# Supplementary material
Source: publisher figshare collection journal article supplement (https://gsapubs.figshare.com/ndownloader/files/22409739)
Supplement: Supplementary file 1 [file 22409739]

## Sheet: SD1
Chapman, A.D., Jacobson, C.E., Ernst, W.G., Grove, M., Dumitru, T., Hourigan, J., and Ducea, M.N., 2016, Assembling the world’s type shallow subduction complex: Detrital zircon geochronologic constraints on the origin of the Nacimiento block, central California Coast Ranges: Geosphere, v. 12, doi:10.1130/GES01257.1.
Table SD1. University of Arizona LA-MC-ICPMS U-Pb detrital zircon data for Nacimiento Franciscan rocks.†
				Isotope ratios								Isotopic ages (Ma)§
Analysis	U	206Pb	U/Th	206Pb*	±	207Pb*	±	206Pb*	±	Error		206Pb*	±	207Pb*	±	206Pb*	±
	(ppm)	204Pb		207Pb*	(%)	235U*	(%)	238U	(%)	correlation		238U	(Ma)	235U*	(Ma)	207Pb*	(Ma)
Sample 11SL1
11SL_1	124.656	4722.53	4.00458	20.3189	23.5073	0.123682	24.1931	0.0182267	5.71956	0.236413		116.439	6.6	118.405	27.0451	158.078	556.786
11SL_2	172.59	10202.7	2.52414	21.188	11.2388	0.114517	11.8711	0.0175978	3.82269	0.322016		112.456	4.26156	110.089	12.3859	59.2111	268.609
11SL_3	433.666	27744.4	2.60238	21.1635	4.18585	0.167234	5.02666	0.0256691	2.78316	0.55368		163.386	4.49014	157.015	7.31279	61.9473	99.7373
11SL_4	197.602	49141.9	3.19964	20.4382	9.02015	0.17049	9.20965	0.0252721	1.85865	0.201816		160.89	2.95337	159.844	13.6217	144.361	211.967
11SL_5	428.685	17432.5	3.18749	21.5763	8.20059	0.089017	8.52953	0.0139299	2.3459	0.275033		89.1785	2.07764	86.5873	7.07947	15.7043	197.341
11SL_6	87.7414	3230.73	1.70191	38.4324	61.0729	0.0581963	61.3469	0.0162215	5.7918	0.0944107		103.732	5.95985	57.436	34.2702	NA	NA
11SL_7	106.86	5048.67	4.18955	20.6339	26.3809	0.163674	26.505	0.024494	2.56238	0.0966753		155.996	3.94922	153.914	37.8711	122.002	631.039
11SL_8	260.632	12178.9	1.99646	21.2237	11.4471	0.117592	11.5501	0.0181007	1.53922	0.133264		115.641	1.7641	112.886	12.3404	55.1484	273.799
11SL_9	92.7773	3365.92	1.99245	27.0342	72.5717	0.0795042	72.9376	0.0155884	7.29603	0.100031		99.7142	7.2192	77.6787	54.5965	-557.227	2252.32
11SL_10	62.9388	3322.1	1.70648	17.4707	336.534	0.109594	336.631	0.0138866	8.10481	0.0240762		88.9031	7.15597	105.594	350.941	500.759	0
11SL_12	455.931	21196.3	2.11371	20.6859	6.84174	0.095486	7.01445	0.0143256	1.54696	0.22054		91.6937	1.40843	92.601	6.20815	116.038	161.519
11SL_13	257.638	9504.1	2.30067	21.2973	8.39535	0.161142	8.63757	0.0248905	2.03119	0.235158		158.49	3.17999	151.703	12.1721	46.9296	200.875
11SL_14	308.765	16249.8	1.94071	21.5532	9.11389	0.144662	9.27558	0.0226133	1.72437	0.185904		144.151	2.45811	137.187	11.9033	18.3126	219.306
11SL_15	151.229	43508.1	1.03874	10.1283	0.992941	3.55972	5.31198	0.261488	5.21835	0.982374		1497.45	69.7327	1540.6	42.1321	1600.32	18.5286
11SL_16	322.751	18633.6	2.89502	19.9728	6.68918	0.207296	6.76313	0.0300282	0.99736	0.14747		190.725	1.87435	191.281	11.7916	198.132	155.542
11SL_17	826.104	50224.2	1.82941	20.7315	3.05196	0.0973884	3.27834	0.0146432	1.1971	0.365154		93.7116	1.11371	94.3627	2.95415	110.836	72.0401
11SL_18	309.197	89691.1	2.898	19.7998	10.8701	0.175399	10.9676	0.0251876	1.45888	0.133018		160.358	2.31058	164.093	16.6196	218.324	252.21
11SL_19	254.821	9936.25	2.68812	20.4267	8.10931	0.122138	8.4715	0.0180946	2.45059	0.289274		115.602	2.80768	117.009	9.36285	145.73	190.472
11SL_20	198.32	14926.2	2.54819	18.9022	10.4051	0.225118	10.5027	0.0308618	1.42849	0.136012		195.94	2.75687	206.16	19.5982	324.653	236.842
11SL_21	555.13	7277.2	1.41458	20.3451	7.17046	0.105811	7.39914	0.0156131	1.82533	0.246694		99.871	1.80892	102.126	7.18899	155.1	168.078
11SL_22	592.37	32539.9	1.21102	20.3595	3.52201	0.171541	4.7088	0.0253299	3.12541	0.663739		161.253	4.97732	160.756	7.00097	153.441	82.5085
11SL_23	649.791	19313.4	2.17281	21.0875	6.43072	0.0937868	6.57311	0.0143438	1.36076	0.207019		91.8093	1.24045	91.0248	5.72288	70.4925	153.084
11SL_25	22.7221	2284.92	8.1213	15.185	38.9598	0.324254	39.3682	0.0357107	5.65572	0.143662		226.191	12.5709	285.17	98.1839	801.735	847.522
11SL_26	154.991	11780.8	2.34101	22.3729	18.869	0.111027	19.0913	0.0180157	2.90484	0.152155		115.103	3.31387	106.905	19.3741	-72.1204	464.597
11SL_27	363.335	24612.3	1.87456	20.3533	2.46761	0.169354	2.92879	0.0249993	1.57756	0.53864		159.175	2.48033	158.858	4.30696	154.12	57.7929
11SL_28	231.749	21487.7	2.85041	21.4132	10.0481	0.103696	10.3382	0.0161042	2.43202	0.235246		102.987	2.48477	100.182	9.86278	33.9068	241.163
11SL_29	306.34	11540.9	1.87438	20.2796	6.66359	0.163375	7.19859	0.0240295	2.72329	0.378309		153.072	4.11949	153.653	10.265	162.605	155.959
11SL_30	468.216	9766.09	1.88105	22.3854	12.1063	0.0897165	12.1752	0.0145658	1.29372	0.106259		93.2202	1.19733	87.2392	10.1784	-73.4845	296.83
11SL_33	148.935	7249.79	2.66541	20.899	11.8955	0.181476	12.3603	0.0275071	3.35755	0.27164		174.927	5.7943	169.33	19.28	91.8312	282.647
11SL_34	285.371	26432.2	5.31262	19.7014	9.4518	0.127527	9.8812	0.0182221	2.88125	0.291589		116.41	3.32396	121.873	11.3483	229.82	218.747
11SL_35	145.438	5237.4	3.78367	22.2782	17.9128	0.141236	18.2076	0.0228205	3.26289	0.179205		145.457	4.69296	134.144	22.8837	-61.7651	439.847
11SL_36	58.5761	2940.97	1.76117	19.6756	53.8141	0.135402	54.5791	0.019322	9.10556	0.166833		123.369	11.1267	128.94	66.1829	232.853	1335.82
11SL_37	260.103	64513.4	1.88446	20.4892	8.84013	0.15609	9.1149	0.0231953	2.22115	0.243683		147.818	3.24591	147.275	12.4965	138.545	207.968
11SL_38	499.978	36566.8	1.5156	20.3355	2.68666	0.183178	3.07965	0.0270164	1.50536	0.48881		171.848	2.55276	170.792	4.84125	156.197	62.8896
11SL_40	347.038	10057	2.84814	24.3732	8.87167	0.0798609	9.00242	0.0141171	1.52874	0.169814		90.3683	1.37186	78.0141	6.76024	-285.796	226.469
11SL_41	119.231	4568.01	2.9216	26.481	30.4695	0.107689	30.6537	0.0206825	3.35505	0.10945		131.968	4.38257	103.849	30.2687	-501.843	827.174
11SL_42	228.625	17365.3	1.93056	20.3285	8.91106	0.203565	9.17233	0.0300128	2.17359	0.236973		190.628	4.08282	188.138	15.7535	156.973	208.909
11SL_43	231.175	15235.4	0.873138	20.4578	4.22019	0.197101	4.9971	0.0292446	2.67601	0.535512		185.819	4.90155	182.67	8.3544	142.131	99.0674
11SL_44	2755.27	69915.9	4.25199	20.675	1.44883	0.0991926	1.5546	0.0148738	0.563632	0.362558		95.1769	0.532506	96.0308	1.42447	117.267	34.1668
11SL_45	337.712	59787.3	6.29882	10.3971	1.34359	1.24294	5.52093	0.0937257	5.35494	0.969935		577.534	29.5819	820.212	31.0749	1551.29	25.2318
11SL_46	908.566	35437.1	3.03229	20.816	3.50932	0.0892642	3.93589	0.0134764	1.7821	0.452784		86.2941	1.5276	86.8177	3.27505	101.242	82.9928
11SL_47	167.675	5772.12	1.97749	22.8359	17.9721	0.0874084	18.2858	0.0144767	3.37225	0.184419		92.6537	3.10217	85.0863	14.9257	-122.422	446.507
11SL_48	169.274	14325.5	2.19571	19.3743	12.1697	0.196987	12.4429	0.0276797	2.59331	0.208416		176.01	4.50273	182.573	20.7951	268.363	280.017
11SL_49	139.603	7162.18	2.41573	20.2601	10.7569	0.16122	11.2828	0.0236896	3.40437	0.301731		150.932	5.0786	151.77	15.9069	164.859	252.02
11SL_50	80.8196	3117.3	5.01479	23.3922	32.8261	0.106117	33.3656	0.0180033	5.97596	0.179105		115.024	6.81286	102.407	32.5132	-182.164	838.858
11SL_51	50.4431	30762.7	2.5325	11.4487	1.86578	2.80462	2.44979	0.232879	1.58756	0.648039		1349.57	19.3312	1356.77	18.3387	1368.12	35.9178
11SL_52	876.688	69213.9	5.05638	20.1324	2.62161	0.198929	2.72764	0.0290463	0.753098	0.276099		184.577	1.37033	184.219	4.5954	179.613	61.1364
11SL_53	265.16	18093.3	3.03318	22.0359	18.5112	0.0882651	18.834	0.0141065	3.47189	0.184342		90.301	3.11329	85.886	15.5117	-35.1653	452.45
11SL_54	171.951	13337.8	1.68455	20.6441	8.22954	0.189989	8.89627	0.0284461	3.3791	0.379834		180.816	6.02505	176.62	14.4229	120.831	194.197
11SL_55	123.786	5914.86	2.03455	23.1237	6.48947	0.165259	7.85294	0.0277155	4.42216	0.563122		176.235	7.68782	155.297	11.309	-153.428	161.246
11SL_56	373.028	83083.9	1.44262	9.46881	0.348792	4.64163	9.84555	0.31876	9.83937	0.999372		1783.67	153.344	1756.79	82.4306	1724.94	6.40571
11SL_57	671.323	40923.3	2.05731	20.4092	7.28241	0.0959385	7.52026	0.014201	1.87638	0.24951		90.9014	1.69369	93.0204	6.68461	147.72	170.94
11SL_58	216.07	17236.3	2.38418	19.3067	17.0801	0.105848	18.3191	0.0148214	6.6225	0.361508		94.8438	6.23505	102.16	17.8059	276.41	393.701
11SL_59	89.4181	5737.89	3.04787	22.4982	23.1247	0.14187	24.4392	0.0231493	7.90701	0.323538		147.529	11.5327	134.708	30.8408	-85.7883	573.091
11SL_60	498.285	27288.6	2.08578	20.9862	4.12754	0.177657	4.26574	0.0270406	1.07704	0.252486		171.999	1.82801	166.042	6.53422	81.9174	97.9791
11SL_61	91.6059	4524.1	2.26752	37.8723	63.0068	0.0800813	63.4849	0.0219964	7.77674	0.122498		140.261	10.7899	78.2214	47.8295	NA	NA
11SL_62	850.715	20496.8	2.69849	21.1424	4.11398	0.0930792	4.21336	0.0142727	0.909701	0.215908		91.3572	0.825216	90.3677	3.64302	64.295	97.9794
11SL_63	228.394	8407.25	1.37131	21.3275	17.0263	0.105351	17.2259	0.0162959	2.61439	0.151771		104.203	2.70239	101.704	16.6721	43.4995	409.544
11SL_65	283.444	25588.8	1.83559	19.7933	6.41724	0.208209	6.51036	0.0298894	1.09715	0.168524		189.856	2.05263	192.049	11.3923	219.107	148.626
11SL_66	239.953	8647.63	2.64627	22.4867	9.63233	0.142299	10.1425	0.0232074	3.17624	0.313162		147.895	4.64403	135.09	12.8298	-84.5384	236.416
11SL_67	289.383	16403.7	2.56082	21.4688	8.84879	0.16468	9.02873	0.0256417	1.79357	0.198651		163.213	2.89059	154.791	12.9632	27.7293	212.527
11SL_68	93.1635	4422.85	1.65558	19.2527	29.5292	0.112121	29.9865	0.0156559	5.2175	0.173995		100.142	5.18456	107.904	30.706	282.822	688.952
11SL_69	57.786	50898	1.69707	7.76645	0.650921	6.81957	1.45665	0.38413	1.30312	0.894603		2095.55	23.3135	2088.27	12.8998	2081.08	11.4553
11SL_70	286.927	9308.55	1.59329	22.9957	11.0331	0.0813216	11.1519	0.0135629	1.62356	0.145586		86.8443	1.40051	79.3867	8.51607	-139.665	273.876
11SL_71	167.966	9228.41	2.81459	20.3629	9.38623	0.200505	9.61293	0.0296117	2.07537	0.215894		188.118	3.84773	185.554	16.3036	153.039	220.252
11SL_72	147.066	7359.73	2.30842	21.5573	10.6541	0.175706	10.868	0.0274713	2.14587	0.197448		174.702	3.69854	164.359	16.4933	17.8159	256.554
11SL_73	133.915	138479	1.95591	9.56407	0.691998	4.32807	1.55036	0.300217	1.38736	0.89486		1692.39	20.6504	1698.72	12.7882	1706.54	12.7367
11SL_74	438.319	21481.1	2.02316	20.3069	5.64039	0.114503	5.90593	0.016864	1.75101	0.296483		107.806	1.87199	110.076	6.16112	159.494	132.05
11SL_75	155.557	6700.85	2.14619	20.2957	16.6289	0.0997151	17.1157	0.0146779	4.05297	0.236798		93.932	3.77943	96.5133	15.7594	160.753	391.279
11SL_76	111.163	4675.87	1.60047	18.5439	29.4862	0.131745	29.7288	0.0177189	3.78983	0.12748		113.223	4.25349	125.665	35.1534	367.94	677.71
11SL_77	203.176	14538.2	2.02334	19.8845	11.834	0.173342	12.3284	0.0249988	3.45604	0.280332		159.171	5.43366	162.316	18.4954	208.457	275.217
11SL_78	322.295	7392.4	2.6399	20.1408	13.3339	0.0983581	13.6153	0.0143676	2.75369	0.20225		91.9606	2.51433	95.2596	12.3807	178.644	312.052
11SL_79	325.784	13213.8	6.47634	20.6082	11.1825	0.102756	11.4381	0.0153584	2.4043	0.210202		98.2543	2.34442	99.3174	10.8225	124.889	263.982
11SL_80	510.612	31673.6	2.55773	22.3274	11.2254	0.0871668	11.4808	0.0141152	2.40825	0.209764		90.3565	2.16083	84.8607	9.34692	-67.1499	274.792
11SL_81	688.501	54676.4	2.78613	20.6922	3.02797	0.164309	3.16765	0.0246586	0.930267	0.293677		157.031	1.44316	154.468	4.53904	115.35	71.4246
11SL_82	370.468	10221.2	2.9983	22.0855	8.8257	0.0929997	9.03056	0.0148966	1.91262	0.211794		95.3215	1.80972	90.2939	7.80216	-40.6183	214.719
11SL_83	119.214	8999.57	1.75694	26.3356	40.8979	0.103533	41.0715	0.0197752	3.77216	0.0918438		126.235	4.71547	100.032	39.1453	-487.201	1125.6
11SL_85	86.0195	3153.39	2.7851	22.2707	35.5294	0.114759	35.9161	0.0185362	5.25615	0.146345		118.398	6.16638	110.31	37.5599	-60.9408	890.931
11SL_86	90.8788	2412.95	1.43596	23.1493	43.8345	0.0833606	44.3186	0.0139958	6.53197	0.147387		89.5973	5.81199	81.2996	34.6395	-156.177	1137.21
11SL_87	304.413	15334.3	2.1716	20.4977	4.63348	0.172775	4.914	0.0256853	1.63656	0.33304		163.487	2.64193	161.824	7.35087	137.581	108.906
11SL_88	165.557	15277	1.75182	19.9426	15.5084	0.17192	15.6327	0.024866	1.96792	0.125885		158.336	3.07797	161.083	23.2899	201.668	361.894
11SL_89	79.0231	3752.57	1.12679	24.2489	25.2293	0.130907	25.6791	0.0230226	4.78511	0.186342		146.731	6.94192	124.913	30.1908	-272.778	649.887
11SL_90	142.058	12043.4	2.22379	20.5452	13.6131	0.212694	13.8415	0.0316931	2.50404	0.180909		201.136	4.95877	195.811	24.6548	132.125	321.358
11SL_91	158.763	8281.76	1.68376	24.7593	24.608	0.0904283	24.8302	0.0162383	3.31401	0.133467		103.838	3.41363	87.9023	20.9112	-326.011	640.229
11SL_92	44.0977	1010.7	1.84886	4.4399	485.297	0.51966	485.363	0.0167336	7.95758	0.0163951		106.979	8.44273	424.924	#NUM!	3018.45	225.955
11SL_93	274.997	7309.9	2.30893	22.2195	11.2927	0.0914302	11.5033	0.014734	2.19083	0.190453		94.2888	2.05067	88.8348	9.78496	-55.3285	275.83
11SL_95	358.82	19204.9	1.92021	20.5378	3.83389	0.21316	4.15175	0.0317511	1.59321	0.383745		201.498	3.16064	196.201	7.40723	132.983	90.1652
11SL_96	271.784	18761.2	3.3462	21.2086	9.76807	0.156987	10.0594	0.0241476	2.40318	0.2389		153.816	3.65272	148.062	13.86	56.8677	233.396
11SL_97	477.622	30421.4	5.84164	20.725	6.72589	0.110369	8.54053	0.0165897	5.26337	0.616281		106.067	5.537	106.302	8.61992	111.57	158.888
11SL_98	213.716	17421.7	3.10946	21.3529	12.457	0.163076	12.832	0.0252549	3.07942	0.239979		160.782	4.88991	153.392	18.2706	40.6976	298.928
11SL_99	96.5945	2205.59	3.42579	19.2323	30.9042	0.123461	31.2098	0.0172211	4.35681	0.139598		110.069	4.75479	118.205	34.8388	285.214	722.163
11SL_100	150.635	6307.92	1.60357	22.4549	17.1115	0.148358	17.5135	0.0241613	3.73113	0.213043		153.902	5.67429	140.461	22.978	-81.0639	421.474
11SL_101	122.613	7011.97	3.06476	26.9127	53.7927	0.0982287	53.9434	0.0191732	4.02924	0.0746938		122.428	4.88638	95.14	49.0288	-545.105	1544.29
11SL_102	145.859	9862.29	2.58698	20.6046	5.43528	0.331824	5.60044	0.0495873	1.35006	0.241063		311.987	4.11171	290.957	14.169	125.299	128.039
11SL_103	121.389	13811.9	1.84295	19.8286	16.5847	0.203595	16.7598	0.029279	2.41601	0.144155		186.034	4.43037	188.163	28.7939	214.97	386.372
11SL_104	144.201	4761.71	2.51713	19.3455	12.653	0.130607	13.1379	0.018325	3.53648	0.269181		117.061	4.10249	124.643	15.4115	271.772	291.037
11SL_105	552.049	26194.5	4.79291	21.0593	5.25676	0.102044	9.55723	0.0155858	7.98167	0.835145		99.6976	7.89633	98.6613	8.9859	73.6719	125.034
Sample 11SL2
	169	816	13			0.15948	2.64	0.01312	0.94	0.357		84	0.8	150.2	4.3	1386	24
	81	1191	81			0.11707	2.22	0.01371	0.77	0.345		87.8	0.7	112.4	2.6	671	22
	95	3049	11			0.06987	8.73	0.01462	0.66	0.076		93.6	0.6	68.6	6.2	-736	122
	103	958	5			0.1426	6.15	0.01475	1.44	0.235		94.4	1.4	135.4	8.9	932	61
	485	9582	456			0.10469	1.47	0.01483	0.92	0.627		94.9	0.9	101.1	1.6	249	13
	169	8192	17			0.09265	5.14	0.01491	1.37	0.267		95.4	1.3	90	4.8	-52	60
	312	10100	50			0.09048	3.37	0.01497	0.56	0.167		95.8	0.5	87.9	3.1	-120	41
	167	3006	57			0.11574	10.55	0.01512	1.06	0.1		96.7	1	111.2	12.3	433	117
	192	10162	239			0.10235	2.46	0.01512	1.08	0.438		96.8	1.1	98.9	2.6	152	26
	165	6601	37			0.08974	5.34	0.01519	0.66	0.124		97.2	0.7	87.3	4.9	-177	66
	245	2127	31			0.0911	4.1	0.01519	1.61	0.393		97.2	1.6	88.5	3.8	-140	47
	101	3591	8			0.0783	8.98	0.01523	0.88	0.098		97.4	0.9	76.5	7.1	-536	120
	356	7328	26			0.10109	2.49	0.01541	0.72	0.288		98.6	0.7	97.8	2.6	78	28
	316	36167	26			0.10423	3.8	0.01543	0.86	0.225		98.7	0.9	100.7	4	148	43
	256	6776	39			0.10134	3.32	0.0155	0.6	0.181		99.1	0.6	98	3.4	71	39
	669	17664	24			0.10134	1.93	0.01554	0.52	0.267		99.4	0.5	98	2	65	22
	161	1726	55			0.13555	6.13	0.01555	1.17	0.192		99.5	1.2	129.1	8.4	716	64
	287	7662	29			0.10453	2.57	0.01569	0.5	0.196		100.3	0.5	100.9	2.7	115	30
	154	27793	56			0.09651	3.75	0.01571	0.7	0.186		100.5	0.7	93.6	3.7	-80	45
	284	9636	48			0.10679	4.37	0.01575	0.94	0.214		100.8	1	103	4.7	156	50
	177	4909	36			0.09605	3.76	0.01583	0.65	0.173		101.3	0.7	93.1	3.7	-111	46
	325	8408	24			0.10105	2.5	0.01586	1.21	0.483		101.5	1.2	97.7	2.6	8	26
	377	9824	29			0.104	2.66	0.01587	0.63	0.236		101.5	0.6	100.5	2.8	75	31
	145	3543	23			0.09957	8.34	0.01588	0.84	0.101		101.6	0.9	96.4	8.4	-30	101
	290	11423	33			0.10048	3.6	0.01589	1.08	0.3		101.6	1.1	97.2	3.7	-9	41
	310	6846	39			0.10005	2.13	0.01596	0.62	0.292		102.1	0.6	96.8	2.2	-31	25
	48	2279	157			0.11219	11.59	0.01607	2.28	0.197		102.8	2.4	108	13.1	224	131
	615	66181	55			0.10299	2.26	0.01609	0.6	0.265		102.9	0.6	99.5	2.4	20	26
	220	4434	34			0.10474	2.85	0.01616	0.59	0.206		103.4	0.6	101.1	3	49	33
	185	3846	40			0.10055	3.91	0.01625	0.64	0.163		103.9	0.7	97.3	4	-62	47
	163	3553	30			0.10836	6.31	0.01629	0.72	0.114		104.2	0.8	104.5	6.9	111	74
	306	7442	24			0.10683	3.66	0.0163	0.58	0.159		104.2	0.6	103.1	4	77	43
	314	12553	28			0.09409	3.78	0.01629	0.96	0.253		104.2	1	91.3	3.6	-233	46
	331	7788	34			0.11392	3.02	0.01632	0.55	0.182		104.3	0.6	109.5	3.5	224	34
	334	12161	35			0.09925	4.24	0.01648	1.15	0.27		105.3	1.2	96.1	4.3	-128	50
	148	3808	36			0.0991	5.38	0.01651	0.86	0.16		105.6	0.9	95.9	5.4	-138	66
	60	291	28			-0.01035	15.93	0.0167	0.85	0.053		106.8	0.9	-10.6	-1.7	NA	NA
	128	3508	17			0.09778	5.44	0.01673	1	0.185		107	1.1	94.7	5.4	-203	67
	75	1781	20			0.07131	11.51	0.01681	0.97	0.084		107.4	1	69.9	8.3	-1081	173
	779	5755	42			0.13216	1.78	0.01692	0.78	0.44		108.2	0.9	126	2.4	477	18
	127	4688	104			0.10365	3.84	0.01695	0.75	0.195		108.3	0.8	100.1	4	-91	46
	69	3388	361			0.09587	4.26	0.01702	1.02	0.24		108.8	1.1	93	4.1	-296	53
	226	5427	45			0.13252	3.66	0.01703	1.9	0.52		108.9	2.1	126.4	4.9	469	35
	221	6623	53			0.105	4.76	0.01706	1.37	0.289		109.1	1.5	101.4	5.1	-75	56
	67	1472	17			0.12264	5.02	0.01716	0.79	0.157		109.7	0.9	117.5	6.2	278	57
	203	5172	27			0.11106	4.98	0.01722	1.11	0.223		110.1	1.2	106.9	5.6	38	58
	98	4266	239			0.10027	3.76	0.01749	1.64	0.437		111.8	1.9	97	3.8	-252	43
	117	5331	260			0.10821	2.26	0.01757	0.55	0.245		112.3	0.6	104.3	2.5	-74	27
	81	5208	234			0.12489	7.58	0.01764	1.32	0.174		112.7	1.5	119.5	9.6	257	86
	115	3613	65			0.10896	4.68	0.01765	1.35	0.289		112.8	1.5	105	5.2	-68	55
	154	1616	31			0.22422	10.4	0.01768	1.01	0.097		113	1.2	205.4	23.4	1467	98
	96	11155	366			0.11181	2.12	0.0177	0.64	0.299		113.1	0.7	107.6	2.4	-13	24
	133	13902	63			0.11496	4.88	0.01781	1.06	0.218		113.8	1.2	110.5	5.7	40	57
	60	939	31			0.08854	9.87	0.01787	3.51	0.355		114.2	4	86.1	8.8	-636	126
	179	3960	30			0.13972	4.7	0.01803	1.41	0.3		115.2	1.6	132.8	6.6	460	50
	57	3076	225			0.10462	3.78	0.01809	0.85	0.224		115.6	1	101	4	-229	46
	114	7629	114			0.12091	3.88	0.01809	1.18	0.304		115.6	1.4	115.9	4.7	122	43
	81	3536	322			0.10815	3.32	0.01815	0.98	0.294		116	1.1	104.3	3.6	-155	39
	92	2630	40			0.07894	9.38	0.01817	1.47	0.157		116	1.7	77.1	7.5	-1010	138
	148	4320	152			0.12812	2.57	0.01825	1.24	0.483		116.6	1.5	122.4	3.3	238	26
	63	1725	33			0.09931	14.35	0.01828	2.6	0.181		116.7	3.1	96.1	14.4	-389	184
	99	6005	270			0.11337	2.17	0.01832	0.72	0.332		117	0.8	109	2.5	-62	25
	129	3788	18			0.13142	8.32	0.01833	1.92	0.231		117.1	2.3	125.4	11	286	93
	152	1381	84			0.33207	6.77	0.01838	0.94	0.138		117.4	1.1	291.1	22.6	2112	59
	52	3437	456			0.11627	8.03	0.01844	1.14	0.142		117.8	1.4	111.7	9.4	-16	96
	72	3223	240			0.11927	2.5	0.01845	0.92	0.369		117.8	1.1	114.4	3	43	28
	140	5485	141			0.12773	2.27	0.01861	1.58	0.694		118.9	1.9	122.1	2.9	184	19
	127	2100	126			0.37701	35.12	0.01879	5.23	0.149		120	6.3	324.8	126.3	2294	299
	110	6068	25			0.08946	8.1	0.01883	2.93	0.362		120.3	3.6	87	7.3	-753	106
	50	2338	21			0.0623	40.38	0.01888	1.71	0.042		120.6	2.1	61.4	25.2	-1916	741
	51	1487	38			0.1078	19.44	0.01919	1.3	0.067		122.5	1.6	104	21.1	-304	248
	52	3007	325			0.14738	5.7	0.01932	1.02	0.179		123.4	1.3	139.6	8.5	425	63
	128	5690	190			0.12697	2.73	0.01954	2.14	0.784		124.7	2.7	121.4	3.5	56	20
	195	395	367			1.66578	66.79	0.01969	19.6	0.293		125.7	24.8	995.6	759.4	4540	463
	62	2342	163			0.12841	5.27	0.01974	1.15	0.218		126	1.5	122.7	6.8	58	61
	138	5915	31			0.13135	6.53	0.02018	0.59	0.091		128.8	0.8	125.3	8.7	60	78
	229	4817	131			0.14693	3.6	0.02038	0.79	0.221		130	1	139.2	5.4	298	40
	85	5160	375			0.13583	6.4	0.0206	5.72	0.894		131.4	7.6	129.3	8.8	91	34
	72	3011	67			0.16301	9.85	0.02104	2.82	0.287		134.2	3.8	153.3	16.2	460	105
	44	2716	162			0.12834	4.49	0.02114	2.9	0.644		134.9	3.9	122.6	5.8	-110	42
	21	962	0			-0.01926	85.67	0.02168	2.35	0.027		138.3	3.3	-19.8	-16.9	NA	NA
	183	6550	140			0.17188	3.81	0.02178	2.46	0.646		138.9	3.5	161	6.6	501	32
	1	138	119			-0.25688	120.34	0.02197	4.7	0.039		140.1	6.7	-301.5	-375.5	NA	NA
	275	2117	1059			0.85111	8.44	0.02252	2.41	0.286		143.6	3.5	625.3	70.5	3330	63
	121	2114	103			0.24539	22.15	0.02333	2.66	0.12		148.7	4	222.8	53.7	1102	220
	98	4040	39			0.19467	6.51	0.02355	2.33	0.357		150.1	3.5	180.6	12.8	602	66
	476	13255	36			0.22527	4.52	0.02373	3.5	0.774		151.2	5.3	206.3	10.3	894	30
	149	4986	15			0.24247	11.9	0.0244	7.92	0.665		155.4	12.4	220.4	28.9	988	90
	57	2783	20			0.11849	8.56	0.02474	0.75	0.088		157.5	1.2	113.7	10.2	-730	119
	33	1395	187			0.13267	15.8	0.02519	2.18	0.138		160.4	3.5	126.5	21.1	-472	207
	35	2252	159			0.18826	6.96	0.02565	4.11	0.59		163.2	6.8	175.1	13.2	339	64
	219	65265	14			0.16829	4.47	0.02713	0.85	0.191		172.5	1.5	157.9	7.6	-56	53
	108	4423	3472			0.24097	38.14	0.02719	36.48	0.957		172.9	63.6	219.2	89.3	751	117
	59	3491	629			0.17981	4.01	0.02946	2.23	0.557		187.2	4.2	167.9	7.3	-96	41
	24	1017	91			0.16715	8.35	0.03167	2.28	0.273		201	4.6	156.9	14.1	-466	106
	104	5440	43			0.33082	9.49	0.03198	8.49	0.895		202.9	17.5	290.2	31.4	1069	43
	101	9041	46			0.28026	6.57	0.03546	5.47	0.832		224.6	12.5	250.9	18.5	504	40
	169	6931	24			0.29835	3.57	0.03877	0.89	0.248		245.2	2.2	265.1	10.8	445	38
	61	37596	177			1.95279	1.06	0.18159	0.75	0.714		1075.7	8.8	1099.4	20.7	1147	7
	46	31779	146			3.12307	0.87	0.25261	0.8	0.914		1451.9	13	1438.4	27.4	1418	3
	270	130127	39			4.75536	1.21	0.31174	0.93	0.768		1749.3	18.6	1777.1	56.6	1810	7
Sample 10NB2
	465	4915	122			0.08007	2.69	0.01255	0.83	0.308		80.4	0.7	78.2	2.2	11	31
	395	77181	70			0.08392	2.66	0.01328	0.55	0.207		85	0.5	81.8	2.3	-11	31
	411	3832	41			0.09666	2.41	0.01396	0.38	0.159		89.4	0.3	93.7	2.4	205	28
	271	29355	90			0.09403	2.98	0.01421	0.48	0.161		90.9	0.4	91.2	2.8	99	35
	630	2397	27			0.09254	3.7	0.01429	0.77	0.21		91.5	0.7	89.9	3.5	48	43
	533	2767	109			0.19497	7.13	0.01488	0.66	0.092		95.2	0.6	180.9	14	1529	67
	334	4526	28			0.08681	3.63	0.0149	1.03	0.285		95.3	1	84.5	3.2	-211	44
	419	5393	25			0.0957	2.79	0.01511	0.48	0.171		96.7	0.5	92.8	2.7	-6	33
	459	5670	35			0.10174	1.8	0.01517	0.37	0.203		97.1	0.4	98.4	1.9	130	21
	106	1575	32			0.12446	16.13	0.01537	1.32	0.082		98.3	1.3	119.1	20.2	557	175
	56	774	59			0.09508	11.77	0.01542	1.39	0.118		98.6	1.4	92.2	11.3	-71	143
	213	3488	33			0.10246	4.13	0.01564	1.31	0.317		100.1	1.3	99	4.3	75	47
	340	3083	33			0.10903	5.14	0.01572	1.46	0.284		100.5	1.5	105.1	5.7	209	57
	387	7438	15			0.09887	2.09	0.01573	0.54	0.259		100.6	0.5	95.7	2.1	-24	24
	290	7063	38			0.10272	4.27	0.01576	1.96	0.46		100.8	2	99.3	4.4	63	45
	305	4711	26			0.1007	3.46	0.01575	0.97	0.282		100.8	1	97.4	3.5	16	40
	56	1056	37			0.06559	18.22	0.0158	0.91	0.05		101	0.9	64.5	12.1	-1147	279
	77	723	57			0.05834	16.68	0.01581	7.39	0.443		101.1	7.5	57.6	9.8	-1525	250
	310	3153	28			0.1014	5.05	0.01587	0.94	0.185		101.5	1	98.1	5.2	15	60
	981	14071	38			0.10281	2.1	0.01587	0.63	0.303		101.5	0.6	99.4	2.2	49	24
	396	2731	29			0.09939	2.11	0.01588	1.04	0.494		101.6	1.1	96.2	2.1	-34	22
	266	5462	24			0.09619	2.27	0.01598	0.53	0.233		102.2	0.5	93.3	2.2	-130	27
	167	2528	30			0.08773	5.54	0.016	1.06	0.19		102.3	1.1	85.4	4.9	-366	70
	248	4513	27			0.09783	3.11	0.01599	0.61	0.197		102.3	0.6	94.8	3.1	-90	37
	215	3526	30			0.09371	3.9	0.01599	0.63	0.162		102.3	0.7	91	3.7	-196	48
	183	2682	36			0.10118	3.3	0.01606	0.92	0.278		102.7	0.9	97.9	3.4	-19	38
	229	4959	49			0.10499	2.51	0.01608	0.93	0.371		102.9	1	101.4	2.7	67	28
	599	10053	26			0.10605	1.94	0.01618	0.91	0.467		103.4	0.9	102.3	2.1	77	20
	166	2920	47			0.0918	7.22	0.01621	1.45	0.201		103.6	1.5	89.2	6.7	-282	90
	357	4462	33			0.1083	2.15	0.01623	0.91	0.424		103.8	1	104.4	2.4	118	23
	412	7420	21			0.10297	2.11	0.01623	0.81	0.385		103.8	0.8	99.5	2.2	-1	23
	404	8227	44			0.10472	5.51	0.01624	1.09	0.198		103.8	1.1	101.1	5.8	38	65
	334	3694	23			0.10679	2.46	0.01624	0.4	0.161		103.8	0.4	103	2.7	84	29
	317	4717	33			0.11781	6.48	0.01631	0.86	0.132		104.3	0.9	113.1	7.7	302	73
	326	4189	21			0.10303	4.18	0.01633	0.6	0.144		104.4	0.6	99.6	4.4	-15	50
	76	1233	33			0.05459	9.59	0.01637	1.09	0.114		104.7	1.2	54	5.3	-1878	173
	203	3538	28			0.09703	4.5	0.01639	0.8	0.178		104.8	0.8	94	4.4	-172	55
	291	4308	27			0.10157	2.55	0.01641	0.8	0.315		104.9	0.8	98.2	2.6	-62	29
	265	2914	-24			0.09312	12.67	0.01642	11.47	0.906		105	12.1	90.4	11.9	-280	68
	178	2773	30			0.10725	4.14	0.01642	0.5	0.121		105	0.5	103.5	4.5	67	49
	254	3979	28			0.10222	5.01	0.01644	0.58	0.116		105.1	0.6	98.8	5.2	-51	61
	300	4046	29			0.10474	2.84	0.01649	0.38	0.133		105.5	0.4	101.1	3	0	34
	38	654	35			-0.00039	137.98	0.01662	1.16	0.008		106.3	1.2	-0.4	-0.6	NA	NA
	286	6403	43			0.10331	2.54	0.01664	0.85	0.336		106.4	0.9	99.8	2.7	-54	29
	120	2563	27			0.10346	7.66	0.01667	2.76	0.361		106.6	3	100	8	-54	87
	932	8154	23			0.11238	3.6	0.01668	2.87	0.797		106.6	3.1	108.1	4.1	142	26
	176	2586	31			0.10705	4.02	0.01667	1.59	0.396		106.6	1.7	103.3	4.4	27	44
	208	3010	22			0.10704	4	0.01682	0.47	0.117		107.5	0.5	103.3	4.3	6	48
	307	4675	31			0.12138	4.06	0.01689	0.68	0.167		108	0.7	116.3	5	291	46
	156	5090	216			0.10809	1.47	0.01691	0.53	0.359		108.1	0.6	104.2	1.6	16	16
	1128	13428	33			0.1153	1.67	0.01692	1.28	0.769		108.2	1.4	110.8	1.9	168	12
	257	4507	29			0.12195	4.11	0.01699	0.79	0.193		108.6	0.9	116.8	5.1	288	46
	108	1780	40			0.0979	7.78	0.01701	0.45	0.058		108.7	0.5	94.8	7.7	-242	98
	419	6508	16			0.10803	1.97	0.01704	1.13	0.573		108.9	1.2	104.2	2.2	-4	19
	37	1562	462			0.09539	6.5	0.01709	0.69	0.106		109.2	0.8	92.5	6.3	-320	83
	460	7841	33			0.10863	1.91	0.01709	0.64	0.332		109.2	0.7	104.7	2.1	3	22
	30	496	20			0.03087	21	0.01723	1.95	0.093		110.1	2.2	30.9	6.6	-5218	881
	173	2756	43			0.10663	4.04	0.01729	0.72	0.177		110.5	0.8	102.9	4.4	-70	49
	114	1924	30			0.10988	5.86	0.01738	0.64	0.109		111.1	0.7	105.9	6.5	-10	70
	263	4741	16			0.1124	2.55	0.01739	0.74	0.29		111.2	0.8	108.2	2.9	43	29
	1215	16106	34			0.11636	1.09	0.01744	0.67	0.614		111.5	0.7	111.8	1.3	118	10
	452	8176	27			0.11433	2.18	0.01769	0.93	0.427		113	1.1	109.9	2.5	43	24
	67	1224	25			0.0888	5.49	0.01769	0.74	0.135		113.1	0.8	86.4	4.9	-601	74
	71	1212	18			0.09956	12.65	0.01779	0.67	0.053		113.7	0.8	96.4	12.7	-313	162
	179	1569	52			0.11668	7.61	0.01783	1.63	0.214		113.9	1.9	112.1	9	72	88
	50	732	62			0.08941	33.02	0.0179	1.44	0.044		114.4	1.7	87	29.5	-615	450
	61	1296	31			0.06479	11.27	0.0181	3.5	0.311		115.6	4.1	63.7	7.4	-1627	183
	376	4129	13			0.15975	3.23	0.01812	0.7	0.216		115.8	0.8	150.5	5.2	740	33
	94	1884	38			0.09066	6.71	0.01813	1.7	0.253		115.8	2	88.1	6.2	-610	88
	77	1199	19			0.06238	9.83	0.01832	0.93	0.094		117	1.1	61.4	6.2	-1803	175
	76	1445	32			0.08355	14.59	0.01871	3.91	0.268		119.5	4.7	81.5	12.3	-930	205
	59	1303	34			0.09604	13.63	0.0189	1.31	0.096		120.7	1.6	93.1	13.2	-568	183
	76	1410	20			0.11226	7.04	0.01966	0.76	0.108		125.5	1	108	8	-262	89
	202	3387	28			0.12359	5.56	0.01983	4.27	0.768		126.6	5.5	118.3	7	-44	43
	422	5646	33			0.13633	2.45	0.01985	0.67	0.274		126.7	0.9	129.8	3.4	186	27
	503	9134	24			0.14609	2.73	0.01996	0.46	0.168		127.4	0.6	138.5	4	332	31
	530	13344	31			0.14003	1.32	0.02042	0.64	0.484		130.3	0.8	133.1	1.9	183	13
	198	5974	163			0.13292	1.77	0.02069	0.5	0.284		132	0.7	126.7	2.4	28	20
	66	3728	524			0.12607	2	0.02076	0.65	0.326		132.4	0.9	120.6	2.6	-108	23
	175	5373	98			0.13443	2.6	0.02074	0.64	0.246		132.4	0.9	128.1	3.5	49	30
	609	9586	21			0.14152	1.2	0.02088	0.49	0.41		133.2	0.7	134.4	1.7	155	13
	37	1387	240			0.1004	14.57	0.0211	2.01	0.138		134.6	2.7	97.1	14.7	-748	202
	108	2489	18			0.12758	6.54	0.02116	0.97	0.148		135	1.3	121.9	8.4	-127	80
	30	1479	601			0.14631	7.49	0.02157	1.07	0.143		137.6	1.5	138.7	11.1	157	87
	41	1938	172			0.16859	9.02	0.0217	7.59	0.842		138.4	10.6	158.2	15.3	466	54
	53	1000	109			0.12179	11.2	0.02206	3.27	0.292		140.7	4.6	116.7	13.8	-349	138
	91	2048	46			0.13616	6.64	0.0224	0.7	0.105		142.8	1	129.6	9.1	-106	81
	126	2807	53			0.12544	7.08	0.02246	1.16	0.164		143.2	1.7	120	9	-319	90
	170	3474	96			0.1662	4.26	0.0225	1.56	0.366		143.4	2.3	156.1	7.2	354	45
	35	972	26			0.07971	17.95	0.02447	0.73	0.04		155.8	1.1	77.9	14.4	-1964	333
	91	1807	68			0.20098	5.07	0.02458	2.41	0.475		156.5	3.8	186	10.3	579	48
	41	1857	340			0.17597	5.77	0.02621	2.72	0.472		166.8	4.6	164.6	10.3	133	60
	94	4328	128			0.15529	3.19	0.0266	1.13	0.355		169.3	1.9	146.6	5	-207	37
	87	1804	9			0.21052	6.21	0.02925	1.61	0.259		185.8	3	194	13.2	294	69
	47	2433	112			0.18735	4.86	0.03053	2.32	0.477		193.8	4.6	174.4	9.2	-82	52
	108	21595	40			2.04944	2.45	0.1882	2.24	0.916		1111.6	27.2	1132.1	49.7	1172	10
	68	14911	44			2.43096	1.88	0.2122	1.72	0.912		1240.5	23.5	1251.8	45.5	1271	8
	44	10903	29			2.63518	1.31	0.22214	0.93	0.71		1293.2	13.3	1310.5	34.6	1339	9
	30	11977	342			2.78038	2.3	0.22487	2.21	0.962		1307.5	32	1350.3	63	1419	6
	138	31734	23			2.77049	1.16	0.23519	0.92	0.792		1361.6	14	1347.6	32.2	1325	7
	27	57903	170			2.86286	5.74	0.35085	0.84	0.146		1938.6	19	1372.2	154.6	574	62
Sample 10NB1
10NB1_1	241.158	15143.4	1.93197	26.924	40.3314	0.0879581	41.3485	0.0171757	9.11467	0.220435		109.781	9.92149	85.5994	33.9559	-546.234	1122.26
10NB1_3	263.203	6316.37	1.78803	23.3946	15.2062	0.10361	15.5404	0.01758	3.20581	0.206288		112.343	3.57031	100.104	14.8153	-182.429	381.508
10NB1_4	70.2341	6096.17	2.34851	24.7855	105.653	0.127765	105.903	0.0229673	7.28068	0.0687483		146.382	10.5375	122.088	122.414	-328.734	1360.5
10NB1_5	526.969	543854	2.34578	8.8155	0.18037	5.28211	0.988899	0.337717	0.972311	0.983225		1875.68	15.8239	1865.98	8.44295	1855.17	3.25797
10NB1_6	232.539	20496.5	3.74311	20.2944	8.36031	0.128491	8.84163	0.0189124	2.87742	0.32544		120.779	3.44296	122.741	10.2224	160.942	195.815
10NB1_7	164.894	19813.7	1.95602	21.6077	29.0909	0.111959	29.2284	0.0175455	2.83133	0.0968691		112.125	3.14717	107.756	29.8902	12.2415	712.607
10NB1_8	476.253	17468.8	3.8485	20.6746	7.68004	0.102436	8.55818	0.0153599	3.77615	0.441233		98.2634	3.68244	99.0224	8.07457	117.311	181.293
10NB1_9	1764.44	66301.5	2.3277	20.5773	1.1961	0.11915	2.80902	0.017782	2.54164	0.904814		113.623	2.86259	114.301	3.03664	128.471	28.1477
10NB1_10	79.4438	4928.3	1.76156	20.7812	40.1791	0.118132	41.0083	0.0178047	8.20492	0.200079		113.767	9.2526	113.377	44.0197	105.169	985.358
10NB1_11	681.236	35095.9	2.03833	21.4475	6.85357	0.102666	7.10411	0.0159699	1.87004	0.263233		102.135	1.89491	99.2343	6.71628	30.0649	164.411
10NB1_12	73.2334	38905	2.75905	12.7234	1.72144	2.22871	2.65365	0.205663	2.01953	0.761039		1205.67	22.2076	1190.11	18.6015	1161.94	34.1084
10NB1_13	210.952	24780.2	4.71676	21.5841	15.1526	0.150818	15.5079	0.0236095	3.30061	0.212834		150.428	4.90755	142.634	20.639	14.86	365.969
10NB1_14	268.784	279874	14.5509	4.67955	0.361742	16.8576	1.0098	0.572137	0.942782	0.933633		2916.59	22.1177	2926.77	9.67946	2933.77	5.84504
10NB1_15	377.097	20117.8	3.46195	20.5061	10.8351	0.124011	13.4178	0.0184433	7.91429	0.589837		117.81	9.23918	118.702	15.0325	136.577	255.187
10NB1_17	377.486	17204.2	2.37014	21.2158	11.4992	0.104375	11.7744	0.0160602	2.53062	0.214926		102.708	2.57857	100.806	11.2997	56.06	275.029
10NB1_18	217.377	9286.69	2.51054	29.1508	34.514	0.07697	34.7419	0.0162731	3.9729	0.114355		104.059	4.10096	75.2922	25.2168	-764.8	995.651
10NB1_19	257.102	12877.4	1.5148	21.6208	14.0927	0.108483	14.7953	0.0170111	4.50525	0.304505		108.738	4.85785	104.577	14.7034	10.745	340.405
10NB1_20	271.825	14477.6	1.53713	21.1458	11.3823	0.107605	11.7872	0.0165027	3.06297	0.259856		105.515	3.20558	103.772	11.628	63.9289	271.793
10NB1_22	1360.54	48779.1	4.08858	20.6709	1.56241	0.104966	1.9684	0.0157365	1.19729	0.608253		100.654	1.19576	101.35	1.89865	117.766	36.862
10NB1_23	184.101	10286	1.77366	22.401	26.1304	0.119949	27.7359	0.0194877	9.29973	0.335296		124.417	11.4595	115.025	30.1715	-75.1856	648.372
10NB1_25	551.512	30294.7	3.01337	21.4023	7.83292	0.11491	8.13418	0.0178367	2.19326	0.269635		113.969	2.47768	110.447	8.51277	35.122	187.775
10NB1_26	135.477	4675.89	1.92398	25.037	32.6869	0.0920997	33.1189	0.016724	5.33173	0.160988		106.918	5.65357	89.4575	28.3671	-354.754	863.98
10NB1_27	120.065	7159.45	2.14479	24.1955	46.0843	0.0856706	46.2603	0.0150337	4.0312	0.0871417		96.192	3.84891	83.4623	37.0822	-267.18	1227.52
10NB1_28	244.391	19608	2.04102	21.3359	10.9278	0.108791	11.695	0.0168345	4.16598	0.35622		107.619	4.44618	104.859	11.6518	42.5562	261.953
10NB1_29	292.411	13069.4	1.78807	18.9496	16.9872	0.113808	17.1442	0.0156413	2.3152	0.135042		100.05	2.29848	109.443	17.7892	318.96	388.549
10NB1_30	873.38	104640	2.03958	20.8854	3.60655	0.111113	3.77115	0.0168309	1.10199	0.292217		107.596	1.17586	106.983	3.82925	93.3366	85.4185
10NB1_31	120.62	6993.11	2.69792	24.2217	60.6594	0.114329	61.1524	0.0200844	7.74955	0.126725		128.19	9.83601	109.918	63.7908	-269.928	1688
10NB1_32	159.826	9434.7	1.30914	19.9269	10.1311	0.196128	10.8923	0.0283451	4.00036	0.367267		180.182	7.10815	181.844	18.1366	203.476	235.617
10NB1_33	313.004	16451.1	1.39872	22.5785	15.2485	0.0855892	15.9478	0.0140156	4.67073	0.292876		89.7233	4.1617	83.3862	12.7675	-94.5262	376.099
10NB1_34	161.52	6665.68	1.83426	21.6366	24.7192	0.105852	25.0733	0.0166106	4.19929	0.167481		106.199	4.42307	102.163	24.3739	9.0324	602.685
10NB1_35	257.683	8121.48	1.37624	23.9998	28.8936	0.0902827	29.393	0.0157149	5.39491	0.183544		100.517	5.38074	87.7667	24.7186	-246.603	743.666
10NB1_36	81.1321	4540.26	2.01203	20.8042	31.9733	0.109332	33.4967	0.0164967	9.98661	0.298138		105.477	10.4479	105.354	33.5333	102.59	773.339
10NB1_37	406.584	16286.4	3.34307	21.7098	13.4416	0.11106	14.0036	0.0174869	3.92721	0.280444		111.754	4.35097	106.935	14.214	0.877675	325.161
10NB1_38	153.684	13114.6	4.27612	22.9042	25.0387	0.147463	25.2608	0.0244961	3.34299	0.132339		156.009	5.15275	139.669	32.9742	-129.799	627.06
10NB1_39	129.894	4812.87	2.24227	25.0932	22.802	0.0915331	24.0998	0.0166584	7.8019	0.323733		106.502	8.24095	88.9305	20.5232	-360.554	596.269
10NB1_40	501.505	24108	2.15656	21.0739	10.2088	0.102504	10.3801	0.0156669	1.87769	0.180894		100.212	1.86713	99.0847	9.79946	72.0395	243.291
10NB1_41	219.106	13276.6	1.8078	23.0734	23.128	0.0937532	23.6103	0.0156891	4.7479	0.201094		100.353	4.72776	90.9936	20.5522	-148.023	580.112
10NB1_42	59.5449	1696.65	1.95903	22.1496	102.991	0.108178	103.307	0.0173781	8.07386	0.078154		111.064	8.89035	104.297	102.746	-47.6625	1097.25
10NB1_43	96.3523	13031.1	1.9872	18.7574	47.5262	0.106233	48.0198	0.014452	6.86733	0.14301		92.4969	6.30671	102.513	46.8565	342.099	1136.99
10NB1_44	330.643	10038.5	2.41947	24.4215	27.5932	0.0859477	27.7463	0.0152232	2.91033	0.104891		97.3956	2.81323	83.7215	22.3013	-290.847	715.28
10NB1_45	244.034	8527.55	2.50033	21.4617	13.6624	0.0993227	14.1841	0.0154601	3.81158	0.268722		98.8996	3.74087	96.151	13.0131	28.4803	328.824
10NB1_46	423.898	30628.1	1.68441	19.9056	7.79787	0.128435	7.92859	0.018542	1.43378	0.180837		118.435	1.68259	122.69	9.16313	206.004	181.124
10NB1_47	467.622	29581.1	2.05541	20.2652	8.56994	0.121454	12.5317	0.017851	9.14334	0.729615		114.06	10.3372	116.39	13.7816	164.265	200.616
10NB1_48	168.995	14718.2	2.83557	19.677	21.8624	0.12033	22.8565	0.0171724	6.66763	0.291717		109.761	7.25648	115.371	24.9319	232.689	510.002
10NB1_49	163.111	6356.69	2.07564	21.9998	35.5661	0.107991	35.7524	0.0172308	3.64587	0.101975		110.131	3.98112	104.126	35.3968	-31.178	886.907
10NB1_50	85.2415	4770.56	2.091	25.4574	42.6596	0.093294	43.1503	0.0172253	6.4889	0.150379		110.096	7.08335	90.5673	37.4047	-397.971	1157.24
10NB1_51	249.084	23830.4	1.91548	21.7233	17.4726	0.145663	17.6129	0.0229496	2.21887	0.12598		146.271	3.20901	138.076	22.7419	-0.605196	423.93
10NB1_53	210.574	15377.2	3.55023	19.2291	24.4721	0.110552	25.4929	0.0154178	7.14198	0.280155		98.6313	6.99061	106.47	25.7733	285.619	567.08
10NB1_54	472.151	20693.9	2.3722	21.3644	13.4906	0.111207	14.4275	0.0172315	5.11425	0.354479		110.135	5.58474	107.069	14.6619	39.4108	323.993
10NB1_55	131.306	8153.21	1.66862	24.4412	38.7743	0.0847847	39.1406	0.0150293	5.34241	0.136493		96.1643	5.09937	82.6334	31.0718	-292.904	1022.5
10NB1_56	589.916	52651.8	1.71968	20.5558	10.8049	0.114465	10.9147	0.0170649	1.54399	0.14146		109.08	1.67001	110.041	11.3832	130.879	254.74
10NB1_57	307.893	34220.7	1.61007	20.217	5.55314	0.165367	10.4036	0.0242474	8.79761	0.84563		154.444	13.4259	155.391	14.9911	169.833	129.742
10NB1_58	622.772	24681	1.83446	20.795	7.37966	0.104298	7.6566	0.0157301	2.0406	0.266516		100.614	2.03719	100.736	7.34282	103.628	174.65
10NB1_60	151.495	4998.55	1.83099	28.9501	33.6171	0.0794868	33.9095	0.0166895	4.4435	0.13104		106.7	4.70217	77.6624	25.3583	-745.389	964.501
10NB1_62	100.075	5853.42	2.16994	17.5374	17.103	0.177869	17.5058	0.0226237	3.73357	0.213276		144.217	5.32465	166.226	26.8483	492.337	379.599
10NB1_63	95.2181	5319.57	1.65812	21.5094	48.2924	0.120543	48.6632	0.0188048	5.99564	0.123207		120.098	7.13396	115.564	53.2036	23.204	1224.6
10NB1_64	215.009	16236.8	1.98458	20.0713	19.0534	0.0988319	19.7218	0.014387	5.0907	0.258126		92.084	4.6544	95.6975	18.013	186.692	447.043
10NB1_66	156.282	6569.91	2.07274	25.8705	31.4125	0.0862701	31.8245	0.0161869	5.10455	0.160397		103.512	5.24162	84.0229	25.6689	-440.117	843.176
10NB1_67	479.483	20989.9	1.70704	22.5098	7.69512	0.100152	8.6645	0.0163504	3.9823	0.459611		104.549	4.12988	96.9165	8.00919	-87.047	188.814
10NB1_69	390.864	19988.2	2.23695	21.3806	9.20884	0.103199	9.47821	0.0160028	2.24359	0.236711		102.344	2.27805	99.7254	9.00308	37.5448	220.772
10NB1_70	73.1045	6602.55	2.24833	16.6773	81.3247	0.158507	81.5433	0.0191723	5.96702	0.0731761		122.423	7.23606	149.395	113.757	602.167	2222.13
10NB1_71	102.474	5021.16	2.89106	20.9466	36.7484	0.115063	37.0066	0.0174802	4.36437	0.117935		111.711	4.83348	110.586	38.7932	86.4539	898.46
10NB1_72	362.788	19216.7	1.77175	21.8372	12.9878	0.0986171	13.2004	0.0156188	2.35914	0.178718		99.9073	2.33878	95.499	12.0321	-13.2293	314.95
10NB1_74	305.853	12919.3	1.52665	22.2013	13.9151	0.103034	14.3459	0.0165905	3.4891	0.243213		106.072	3.67066	99.5733	13.6074	-53.3373	340.205
10NB1_75	396.088	36029.7	2.02678	19.5088	13.6667	0.114856	13.9054	0.0162511	2.56541	0.18449		103.919	2.64458	110.397	14.5471	252.509	315.634
10NB1_76	220.797	10625.5	1.69014	26.1942	14.831	0.0994234	15.378	0.0188883	4.06502	0.26434		120.626	4.85788	96.244	14.1215	-472.929	394.375
10NB1_79	191.946	8241.11	1.57091	20.4944	24.4414	0.10504	24.8066	0.0156131	4.24112	0.170967		99.8706	4.20299	101.418	23.9471	137.943	581.637
10NB1_80	87.2591	2633.75	2.33749	29.8444	69.1294	0.0841501	69.2487	0.0182145	4.06363	0.0586816		116.361	4.68608	82.0393	54.6293	-831.494	2226.19
10NB1_81	99.6662	8214.49	2.82718	19.6679	30.1864	0.155173	31.1891	0.0221346	7.84465	0.251519		141.133	10.9511	146.469	42.5652	233.794	711.116
10NB1_82	93.7074	11325.2	1.25651	28.8891	78.3725	0.116915	78.9924	0.0244964	9.87695	0.125037		156.011	15.2242	112.271	84.1506	-739.486	2613.18
10NB1_84	94.11	9516.01	3.03008	19.1611	24.7824	0.158823	26.1379	0.0220716	8.30798	0.317852		140.735	11.5656	149.673	36.39	293.706	573.629
10NB1_85	141.222	10964.6	2.237	20.1445	20.6361	0.154689	21.2898	0.0226003	5.23532	0.245907		144.069	7.45881	146.043	28.9677	178.213	485.604
10NB1_87	349.09	17145.4	2.09029	24.0917	13.2339	0.0943564	13.5205	0.0164868	2.76912	0.204809		105.414	2.89531	91.5534	11.8373	-256.272	336.485
10NB1_88	491.821	23772.3	1.79695	19.9938	7.67495	0.10947	7.92369	0.0158741	1.9698	0.248596		101.527	1.98422	105.481	7.93865	195.738	178.598
10NB1_90	199.389	14606.1	1.59981	24.8895	27.9499	0.0886216	28.1373	0.0159976	3.24173	0.115211		102.311	3.29047	86.2186	23.2622	-339.51	731.88
10NB1_91	725.112	52053.9	0.970051	21.3116	4.36547	0.101694	4.51523	0.0157185	1.15323	0.255409		100.54	1.15046	98.3389	4.23201	45.3211	104.364
10NB1_92	96.6086	4242.7	1.6091	21.9742	17.8819	0.108835	20.2821	0.0173452	9.57077	0.471883		110.856	10.519	104.899	20.2162	-28.3557	436.287
10NB1_93	372.078	16297	1.82171	19.5615	16.5697	0.11228	17.2116	0.0159296	4.65698	0.270571		101.879	4.7072	108.049	17.6435	246.287	383.846
10NB1_94	117.025	5190.29	1.6258	24.3982	24.5375	0.107929	25.1044	0.0190984	5.30455	0.2113		121.955	6.40838	104.07	24.8367	-288.413	633.563
10NB1_95	1069.92	75118.5	2.16149	20.4674	2.47136	0.160007	3.04048	0.0237519	1.77113	0.582515		151.325	2.64894	150.709	4.25845	141.051	58.0341
10NB1_96	615.817	24813.9	2.83303	22.0196	3.98875	0.11457	5.72688	0.018297	4.10939	0.717561		116.884	4.75993	110.138	5.97748	-33.3598	96.7692
10NB1_97	186.901	9049.62	2.71388	20.2303	10.7839	0.155624	11.8727	0.0228339	4.96666	0.418327		145.541	7.14755	146.866	16.2359	168.29	252.495
10NB1_98	114.401	5588.98	1.7496	21.897	18.771	0.116121	19.4007	0.0184414	4.90255	0.2527		117.798	5.72268	111.549	20.4977	-19.8398	457.562
10NB1_99	134.824	5963.1	1.88002	29.9258	30.8839	0.0759943	31.5497	0.016494	6.44731	0.204354		105.46	6.74399	74.3719	22.6291	-839.279	900.761
10NB1_100	206.066	12311.8	2.98811	22.5049	29.1749	0.0925881	29.4777	0.0151123	4.21453	0.142974		96.6916	4.04469	89.9115	25.3695	-86.5209	728.218
10NB1_101	289.334	15407.5	1.3483	20.102	9.24507	0.124678	9.51261	0.0181772	2.2402	0.235497		116.126	2.57815	119.304	10.708	183.134	215.731
10NB1_102	92.138	6459.09	2.08508	22.6763	21.2018	0.11379	22.1293	0.0187144	6.33955	0.286478		119.526	7.50757	109.426	22.96	-105.144	526.418
10NB1_104	114.255	7288.04	1.8902	31.851	57.1709	0.0757273	57.6893	0.0174934	7.71665	0.133762		111.795	8.55245	74.1199	41.2586	-1021.28	1831.63
10NB1_105	129.699	5473.52	3.7663	22.7911	29.7059	0.0948226	29.8905	0.0156739	3.31684	0.110967		100.257	3.29963	91.9859	26.2922	-117.582	746.43
Sample SLO-387
387-1	119.06	5223.76	2.44113	22.3999	15.8369	0.105063	16.6854	0.0170685	5.2531	0.314832		109.102	5.68303	101.439	16.109	-75.0697	389.305
387-2	451.975	26329.5	2.4467	21.4341	6.14176	0.107189	6.577	0.0166631	2.3528	0.357732		106.532	2.48589	103.391	6.46536	31.6034	147.254
387-3	164.527	10944.1	2.12097	23.3194	16.6852	0.0955224	17.0867	0.0161556	3.68217	0.215499		103.313	3.77384	92.6348	15.1288	-174.393	418.363
387-4	161.184	5729.12	1.81915	21.6312	15.2555	0.107681	15.7537	0.0168934	3.93041	0.249491		107.992	4.20919	103.842	15.5515	9.61091	368.845
387-5	1000.84	89757	2.44464	20.9087	3.65103	0.112941	4.38985	0.0171268	2.43737	0.555228		109.472	2.64571	108.652	4.52337	90.7338	86.5318
387-6	187.981	12541.4	2.3644	20.8342	19.4676	0.103636	19.8025	0.0156599	3.62662	0.183139		100.168	3.60463	100.128	18.8837	99.1619	464.344
387-7	284.171	15795.3	1.43756	22.1193	10.2127	0.0990552	10.4003	0.0158909	1.96626	0.189058		101.634	1.98271	95.9039	9.51801	-44.336	248.786
387-8	304.077	11290.2	1.24807	21.8959	12.2967	0.0987831	12.3495	0.0156871	1.14052	0.0923534		100.341	1.13555	95.6524	11.2738	-19.7116	298.445
387-9	51.0035	9797.5	1.55117	21.5464	32.5769	0.162927	32.9636	0.0254604	5.03412	0.152718		162.074	8.05729	153.262	46.926	19.0699	800.952
387-10	323.937	15032.2	1.39206	21.0615	15.2739	0.102443	15.4512	0.0156484	2.33406	0.151061		100.095	2.31823	99.029	14.5797	73.4191	364.912
387-11	96.1065	2655.8	2.11303	24.1711	51.258	0.096179	51.543	0.0168607	5.41263	0.105012		107.785	5.78549	93.2431	45.951	-264.621	1382.62
387-12	796.818	39917	2.81953	20.712	5.38665	0.109312	5.6223	0.0164206	1.61068	0.28648		104.994	1.67743	105.336	5.62554	113.094	127.17
387-13	171.262	17324.3	2.16069	20.3329	14.8167	0.115333	15.1786	0.0170079	3.29467	0.21706		108.718	3.55187	110.832	15.9385	156.492	348.461
387-14	331.427	32809.3	1.83563	20.8441	7.42613	0.102	7.72244	0.01542	2.11862	0.274346		98.645	2.074	98.621	7.2579	98.0633	175.934
387-15	387.287	2961.49	2.71121	21.479	10.6474	0.107884	11.023	0.0168062	2.85322	0.258842		107.439	3.04008	104.028	10.8996	26.5578	255.953
387-16	78.4935	2787.81	1.48573	18.5234	25.4134	0.130984	25.8426	0.017597	4.69064	0.181508		112.451	5.22893	124.981	30.3989	370.429	580.788
387-17	131.646	7541.99	1.80049	21.5511	15.4656	0.0997518	15.8545	0.0155915	3.48988	0.220119		99.7339	3.4538	96.5472	14.6029	18.5511	373.347
387-18	397.127	15346.3	1.10292	20.5936	12.7058	0.106783	12.8893	0.0159491	2.16744	0.168158		102.003	2.19345	103.019	12.6277	126.6	300.087
387-19	71.2266	5494.36	2.65472	14.6893	399.624	0.187943	399.666	0.0200228	5.74848	0.0143832		127.8	7.27422	174.873	756.714	870.895	0
387-20	136.137	4298.32	2.21425	18.2682	12.5305	0.152326	12.7014	0.0201822	2.07668	0.1635		128.807	2.64837	143.964	17.0498	401.592	281.677
387-21	375.375	77637.2	2.54787	19.9105	2.89033	0.232392	3.35155	0.0335585	1.69674	0.506255		212.781	3.55141	212.172	6.41734	205.397	67.0669
387-22	357.37	7387.01	1.4047	22.5208	8.04548	0.0959793	8.35127	0.0156769	2.23922	0.268129		100.276	2.22802	93.0582	7.42619	-88.2496	197.493
387-23	176.79	5802.25	1.31899	21.3847	17.1013	0.100677	17.6172	0.0156147	4.23217	0.240229		99.8809	4.19455	97.4015	16.3636	37.0928	411.885
387-24	480.696	24903.4	2.37998	21.413	4.46469	0.107895	4.6718	0.0167562	1.37561	0.294449		107.122	1.46141	104.038	4.61975	33.9189	106.967
387-25	163.886	7495.58	1.89942	24.2188	38.0061	0.0894926	38.2199	0.0157195	4.03728	0.105633		100.546	4.02783	87.0306	31.8879	-269.622	996.29
387-26	240.908	22591.9	3.6264	20.1886	5.90941	0.180217	6.28277	0.0263877	2.13358	0.339591		167.9	3.53603	168.247	9.74157	173.109	138.022
387-27	860.631	68157.5	2.91464	20.7421	2.47308	0.108715	3.13977	0.0163546	1.93444	0.616107		104.576	2.00663	104.789	3.12606	109.62	58.3805
387-29	204.725	10316.1	1.16796	22.0275	13.8975	0.0972833	14.1557	0.0155419	2.69152	0.190137		99.4186	2.65534	94.2656	12.7439	-34.236	338.533
387-30	31.8561	2194.03	3.1335	9.80761	174.893	0.362382	175.073	0.0257767	7.93377	0.0453169		164.062	12.8521	313.991	512.3	1660.12	274.937
387-31	218.83	5411.79	2.22249	21.0118	19.1553	0.102173	19.6304	0.0155703	4.29245	0.218664		99.5993	4.2424	98.7801	18.4796	79.0298	458.473
387-32	32.1953	17442.8	2.18982	13.6526	4.4105	1.6279	4.88712	0.161192	2.10508	0.43074		963.397	18.8376	981.049	30.7492	1020.75	89.3174
387-34	193.168	9142.7	1.34555	22.3595	18.285	0.0969112	18.5622	0.0157157	3.19637	0.172197		100.522	3.18815	93.9211	16.6534	-70.6579	449.881
387-35	917.309	35673.4	1.86073	20.5604	2.43518	0.107703	3.44532	0.0160605	2.43724	0.707406		102.71	2.48345	103.862	3.40147	130.365	57.2878
387-36	490.63	23617.1	1.15532	20.7033	5.61153	0.105409	5.98064	0.0158277	2.06853	0.345871		101.233	2.07767	101.757	5.7908	114.05	132.461
387-38	195.367	11473.9	1.84564	21.9797	16.8745	0.0990983	17.0116	0.0157974	2.15547	0.126706		101.041	2.16093	95.9436	15.5754	-28.9688	411.447
387-39	805.132	100648	1.73669	20.7086	3.98701	0.132291	4.3509	0.0198692	1.74186	0.400344		126.829	2.18759	126.154	5.1616	113.445	94.0886
387-40	171.518	25990.4	1.55665	20.7917	24.2899	0.107007	24.8607	0.0161362	5.29642	0.213044		103.19	5.42187	103.224	24.4055	103.996	581.557
387-41	177.091	11311.1	1.90869	22.6274	16.0695	0.0966648	16.4694	0.0158636	3.60718	0.219023		101.461	3.63121	93.693	14.7412	-99.8378	396.95
387-42	149.31	5790.25	2.28121	21.659	19.844	0.100618	20.2059	0.0158057	3.80691	0.188406		101.093	3.81851	97.3471	18.7585	6.50654	481.742
387-43	112.774	90718.7	2.73072	9.51863	0.289192	4.49925	1.41476	0.310608	1.38489	0.978885		1743.7	21.158	1730.83	11.7536	1715.3	5.31759
387-44	105.712	3697.71	1.94072	21.9921	18.5505	0.0974419	19.2505	0.0155421	5.14378	0.267203		99.4205	5.07474	94.4122	17.3571	-30.3324	453.009
387-45	146.462	110369	0.519209	5.82523	0.365419	9.24463	2.51613	0.390572	2.48946	0.989398		2125.48	45.0752	2362.55	23.0585	2573.95	6.10731
387-46	232.964	31952	2.80574	20.7917	11.3341	0.172412	11.4724	0.025999	1.77624	0.154827		165.459	2.90155	161.51	17.1323	103.999	268.621
387-48	329.181	12249.8	1.7005	20.9579	7.10863	0.110605	7.5276	0.0168121	2.47633	0.328967		107.477	2.63942	106.519	7.61223	85.1737	168.779
387-49	76.6846	4221.76	1.52081	28.3981	48.1353	0.0873376	48.2986	0.0179883	3.96736	0.0821424		114.929	4.51925	85.0202	39.4111	-691.726	1403.18
387-50	412.733	3589.73	1.91624	19.7476	9.15127	0.107587	9.20175	0.0154089	0.962501	0.1046		98.5746	0.941564	103.755	9.07596	224.439	211.955
387-51	142.664	9009.28	2.37319	29.7033	15.7276	0.0727922	16.1961	0.0156815	3.86755	0.238795		100.305	3.84933	71.3457	11.1591	-817.973	450.117
387-52	90.5681	5844.33	2.22443	25.2294	65.8372	0.0949967	66.0383	0.0173826	5.14979	0.0779818		111.092	5.67201	92.1474	58.2368	-374.573	1908.37
387-53	587.566	28676.2	1.14451	20.9549	4.97763	0.106992	5.18903	0.0162605	1.46602	0.282523		103.979	1.51212	103.21	5.09243	85.5126	118.127
387-54	467.744	10987.2	1.69807	20.437	3.5005	0.111937	3.96158	0.0165917	1.85491	0.468223		106.079	1.95157	107.736	4.04944	144.492	82.1596
387-56	214.167	4935.2	1.27808	20.5179	10.6003	0.108069	10.9587	0.0160817	2.7799	0.253669		102.844	2.83628	104.197	10.8528	135.233	249.691
387-57	110.109	5645.94	1.74483	23.362	45.9332	0.0906795	46.1125	0.0153645	4.06242	0.0880981		98.2928	3.96278	88.1361	38.9469	-178.949	1202.53
387-58	131.82	6448.16	1.84744	28.0485	32.6092	0.0791426	32.7521	0.0160997	3.05623	0.0933142		102.959	3.12167	77.3386	24.3941	-657.511	917.024
387-59	532.188	80905.1	1.33229	17.4979	0.75401	0.649407	1.88218	0.082414	1.72455	0.916251		510.515	8.46453	508.114	7.5247	497.324	16.6294
387-60	591.355	76450	1.99137	20.9124	4.44406	0.104236	4.64144	0.0158095	1.33915	0.28852		101.117	1.34355	100.679	4.44878	90.3058	105.344
387-61	272.37	9925.88	1.98088	20.0033	4.95186	0.179334	5.30132	0.0260174	1.8929	0.357062		165.574	3.09424	167.488	8.18559	194.636	115.174
387-62	86.8732	3819.16	1.29592	25.5095	30.8097	0.10027	31.1528	0.0185512	4.61071	0.148003		118.493	5.41348	97.0259	28.8348	-403.307	820.167
387-63	338.567	24086.2	2.23208	20.8609	5.18329	0.175229	5.61379	0.0265118	2.15595	0.384046		168.68	3.58949	163.947	8.49925	96.16	122.758
387-64	150.873	5299.49	1.65593	22.2663	14.1608	0.162447	14.5195	0.0262337	3.20741	0.220905		166.933	5.2855	152.843	20.6053	-60.462	346.735
387-65	48.6262	3401.44	2.03716	19.0345	31.0061	0.187173	31.4267	0.0258394	5.12395	0.163045		164.456	8.32005	174.214	50.3515	308.841	721.645
387-67	642.594	13522.1	2.49935	21.2285	5.86953	0.108134	6.05221	0.0166486	1.47576	0.243838		106.44	1.55791	104.257	5.99678	54.6308	140.129
387-68	123.97	1362.76	1.86988	19.0458	18.0037	0.11425	18.3626	0.0157817	3.61248	0.196731		100.941	3.61808	109.846	19.12	307.448	412.974
387-69	552.004	22247.8	2.17507	21.965	5.6832	0.100007	6.02189	0.0159316	1.99107	0.330638		101.892	2.01279	96.7827	5.55906	-27.3407	137.788
387-70	976.876	12079.2	1.97015	20.2423	2.37647	0.10878	3.25245	0.01597	2.22055	0.68273		102.136	2.25011	104.849	3.24	166.913	55.5263
387-71	231.412	718.848	1.50505	38.3272	13.6089	0.0551145	13.929	0.0153205	2.969	0.213153		98.0132	2.888	54.4746	7.38793	-1610.49	465.987
387-72	64.408	3537.23	2.06211	32.9589	43.4136	0.0726791	43.8853	0.0173732	6.41693	0.146221		111.033	7.06393	71.2386	30.2007	-1124.3	1375.59
387-73	72.4296	10595	1.43001	32.0333	46.4667	0.0844028	46.8363	0.0196091	5.87203	0.125374		125.185	7.27999	82.2759	37.0315	NA	NA
387-74	478.496	13094.6	3.07983	21.244	6.94795	0.10519	7.42095	0.0162073	2.60701	0.351304		103.641	2.68034	101.556	7.1719	52.8591	165.978
387-75	170.202	2556.26	1.73869	19.1058	30.4805	0.116174	30.7694	0.0160981	4.20695	0.136725		102.949	4.2966	111.598	32.5294	300.314	709.931
387-76	145.275	6326.77	1.66874	23.0137	13.864	0.095021	14.1673	0.01586	2.9157	0.205806		101.438	2.93448	92.1699	12.4835	-141.597	344.774
387-77	97.132	4116.47	1.90967	32.3469	40.1415	0.0666833	40.4637	0.015644	5.096	0.12594		100.067	5.06004	65.5471	25.6903	-1067.53	1248.31
387-78	349.422	15591.8	1.48198	20.8694	8.24005	0.104793	8.51982	0.0158614	2.16539	0.254159		101.447	2.17952	101.191	8.2058	95.1715	195.374
387-79	28.2393	4768.17	1.25466	23.5397	48.4841	0.155596	49.2404	0.0265642	8.59666	0.174586		169.009	14.3404	146.841	67.4188	-197.884	1281.82
387-80	167.166	5185.55	1.95196	23.3454	30.4492	0.0920979	30.8415	0.0155937	4.90355	0.158992		99.7479	4.85354	89.4558	26.415	-177.17	774.712
387-81	613.6	13156.5	2.97001	20.4151	4.13294	0.104951	4.51441	0.0155395	1.81624	0.402321		99.4035	1.79156	101.336	4.35388	147.057	96.9739
387-82	222.055	4748.85	2.14582	25.191	15.2054	0.0873679	15.3993	0.0159623	2.43591	0.158183		102.087	2.46717	85.0485	12.564	-370.626	396.064
387-83	371.256	32914.2	1.81266	19.8394	3.3166	0.258342	3.79187	0.0371725	1.83804	0.484732		235.283	4.24663	233.33	7.90474	213.723	76.8521
387-84	369.416	15115	1.86052	20.7241	6.63461	0.110643	6.952	0.0166302	2.07661	0.298706		106.324	2.18981	106.553	7.03227	111.686	156.724
387-85	118.449	33298	2.64098	13.5129	1.19323	1.78805	1.34645	0.175237	0.623795	0.463289		1040.9	5.99598	1041.11	8.76818	1041.54	24.0997
387-86	687.039	28433.1	1.04369	20.1593	2.05232	0.106893	2.52665	0.0156288	1.47376	0.583285		99.9705	1.46196	103.12	2.47754	176.496	47.8617
387-87	138.36	3735.8	2.43162	24.3526	20.7765	0.0960926	20.948	0.016972	2.67509	0.127702		108.491	2.87794	93.1631	18.6494	-283.637	534.025
387-88	429.206	28018.3	1.34016	20.6695	5.05781	0.103004	5.68346	0.0154413	2.59234	0.456121		98.7801	2.5412	99.5456	5.3892	117.932	119.299
387-89	819.627	359522	2.83024	9.49282	0.0951103	4.22167	1.1814	0.290656	1.17757	0.996754		1644.8	17.0952	1678.24	9.69876	1720.29	1.74776
387-90	53.7409	4063.95	2.24706	13.5426	82.1159	0.169902	82.4024	0.0166878	6.86514	0.0833124		106.689	7.26404	159.334	122.097	1037.11	2136.35
387-91	468.165	29072.5	1.33653	20.2965	2.78785	0.174764	3.13355	0.025726	1.43074	0.456588		163.743	2.31324	163.545	4.73338	160.662	65.2173
387-92	91.8701	6892.35	1.53276	11.2262	0.817454	2.91103	1.4479	0.237016	1.19507	0.82538		1371.17	14.761	1384.78	10.9431	1405.8	15.6539
387-93	197.476	15694	1.90512	19.982	12.7402	0.115104	13.4002	0.0166812	4.15345	0.309955		106.647	4.39309	110.624	14.0457	197.09	297.047
387-94	395.506	17454.6	2.28852	21.9056	9.66398	0.101848	9.8264	0.016181	1.77925	0.181069		103.475	1.82638	98.4804	9.22286	-20.7922	234.326
387-95	290.795	12057.5	1.61414	19.8593	11.4221	0.109853	11.827	0.0158225	3.06812	0.259416		101.2	3.08069	105.831	11.887	211.379	265.438
387-96	471.052	33464.2	1.39956	20.6628	7.05422	0.10234	7.08436	0.0153367	0.652861	0.0921552		98.1161	0.635712	98.9338	6.6783	118.687	166.451
387-97	654.266	9465.07	2.47541	22.0687	3.8607	0.101906	4.21471	0.0163108	1.69081	0.401167		104.298	1.74928	98.534	3.95781	-38.7721	93.762
387-98	119.511	2253.64	2.55083	25.6855	23.2643	0.0816936	23.4516	0.0152186	2.95798	0.126131		97.3665	2.85844	79.736	17.9859	-421.289	616.17
387-99	51.3957	2501.87	1.6554	25.3361	45.9557	0.110415	46.2717	0.0202892	5.3987	0.116674		129.483	6.92068	106.345	46.7513	-385.537	1252.44
387-100	366.017	90172.8	0.333729	16.5725	1.26237	0.803894	1.40024	0.096624	0.605877	0.432696		594.594	3.44136	599.023	6.33614	615.805	27.2736
387-101	72.4868	2485.05	1.66296	34.4486	61.2276	0.0776643	61.464	0.019404	5.38568	0.0876233		123.888	6.60853	75.9466	45.0063	-1261.17	2095.66
387-102	64.0026	6322.2	2.02582	23.5714	54.3582	0.102917	54.7841	0.0175942	6.81858	0.124463		112.434	7.59991	99.4655	51.9527	-201.253	1461.73
387-103	211.661	6103.08	2.93951	23.4489	17.714	0.0901888	17.8449	0.0153382	2.1576	0.120909		98.1258	2.10113	87.6792	14.9908	-188.22	445.704
387-104	405.953	16807.7	1.54884	21.437	9.93932	0.101746	10.3412	0.015819	2.85487	0.276067		101.178	2.86594	98.3865	9.69725	31.2344	238.662
387-105	173.537	15175.3	2.63103	21.4224	17.5082	0.0997868	18.147	0.0155039	4.77247	0.26299		99.1776	4.697	96.5795	16.72	32.9005	422.146
Sample SLO-401
401-1	109.467	1242.97	1.60662	29.507	21.8756	0.0657824	22.7711	0.0140778	6.32316	0.277683		90.1183	5.65868	64.6892	14.272	-799.128	626.389
401-2	81.3999	1422.54	1.65988	29.114	24.6095	0.0884337	24.8912	0.0186732	3.7344	0.150029		119.265	4.41289	86.0433	20.5377	-761.251	700.749
401-4	46.1131	3035.3	2.80333	22.0909	21.1592	0.265828	21.6221	0.0425904	4.45029	0.205821		268.87	11.7194	239.353	46.1373	-41.2093	518.948
401-5	258.371	3467.68	1.42341	22.7266	9.21837	0.0835564	9.38113	0.0137725	1.73987	0.185465		88.1774	1.52373	81.4831	7.34549	-110.595	227.364
401-6	238.856	3934.04	1.44724	24.0928	10.3446	0.0915506	10.8657	0.0159973	3.32451	0.305963		102.309	3.37442	88.9468	9.25375	-256.387	262.678
401-7	301.922	7186.37	3.07704	20.2649	6.06113	0.172487	6.55577	0.0253512	2.49816	0.381063		161.387	3.98167	161.575	9.79297	164.299	141.789
401-8	279.49	4829.92	2.41433	21.6483	9.28057	0.0849428	9.55659	0.0133367	2.28021	0.238601		85.4059	1.93459	82.7814	7.59732	7.71714	223.77
401-9	189.196	5324.57	1.35887	22.1031	6.41104	0.16344	7.36984	0.0262005	3.63497	0.493222		166.724	5.98268	153.71	10.5128	-42.5522	155.916
401-10	53.1203	3251.9	2.36557	22.7423	32.2562	0.17303	32.6672	0.0285401	5.16555	0.158127		181.405	9.23993	162.045	48.9654	-112.303	812.577
401-11	195.371	12089.6	1.52784	20.8971	9.13611	0.195341	9.25782	0.029606	1.49625	0.16162		188.082	2.77352	181.177	15.3629	92.0207	216.801
401-12	274.443	4900.23	1.36917	21.3069	5.16238	0.101972	5.68486	0.0157581	2.38065	0.41877		100.791	2.38082	98.5955	5.34154	45.8355	123.408
401-13	546.242	6433.92	4.95207	21.6079	3.10466	0.0957082	4.45232	0.0149989	3.19127	0.716765		95.9714	3.04002	92.8069	3.94886	12.198	74.678
401-14	417.096	11339.9	1.46126	20.8448	4.17931	0.11127	4.60942	0.0168218	1.94426	0.4218		107.539	2.07348	107.126	4.68639	97.9961	98.9373
401-15	119.345	3401.61	3.27207	22.6032	24.5208	0.116113	26.4732	0.0190349	9.97787	0.376905		121.554	12.0148	111.542	27.9717	-97.2054	609.908
401-16	83.5714	3342.94	1.96463	20.2085	35.8519	0.120238	36.3325	0.0176228	5.8894	0.162097		112.615	6.57473	115.288	39.6166	170.813	861.855
401-17	427.818	7884.27	1.08654	21.4391	6.73127	0.0898097	6.85432	0.0139646	1.29297	0.188635		89.3986	1.14792	87.326	5.7355	31.0072	161.455
401-18	101.759	4090.55	1.5167	20.8414	27.9009	0.0922739	28.1826	0.0139478	3.97496	0.141043		89.2919	3.52485	89.6194	24.1791	98.3577	671.587
401-19	104.868	40017.6	2.04622	9.49489	0.839343	4.48976	1.844	0.30918	1.64191	0.890403		1736.67	24.9966	1729.08	15.3142	1719.89	15.4249
401-20	188.484	5617.47	2.30179	21.2935	6.6845	0.187408	7.26171	0.0289423	2.83722	0.39071		183.925	5.14463	174.415	11.6379	47.3537	159.84
401-21	308.063	3547.57	1.08659	21.6538	11.7013	0.0882001	12.1318	0.0138517	3.20282	0.264003		88.6808	2.82084	85.8253	9.98454	7.09105	282.464
401-22	285.968	8854.07	1.41348	20.7609	5.26379	0.141118	5.53363	0.0212485	1.70693	0.308465		135.542	2.28945	134.039	6.94862	107.521	124.414
401-23	504.844	9966.86	1.25558	22.21	7.37136	0.0871377	7.49849	0.0140363	1.37494	0.183362		89.8548	1.22688	84.8335	6.10282	-54.29	179.737
401-24	44.2278	2925.65	1.42513	24.6875	48.618	0.100533	49.1757	0.0180005	7.38495	0.150175		115.007	8.41787	97.268	45.6433	-318.563	1316.02
401-25	92.8047	3777.65	1.44346	20.1281	11.6807	0.171206	12.0612	0.0249931	3.00563	0.249199		159.136	4.72448	160.465	17.904	180.107	273.022
401-26	111.389	1243.89	1.58584	18.1032	20.0604	0.150537	21.0515	0.019765	6.38305	0.303212		126.171	7.97524	142.386	27.9747	421.887	451.802
401-27	78.9286	1530.83	2.1946	33.0793	36.1091	0.0812411	36.2853	0.0194909	3.57205	0.0984434		124.437	4.40234	79.3111	27.69	-1135.44	1132.58
401-28	110.449	2412.31	2.12812	20.6204	6.67477	0.205875	7.64557	0.0307891	3.72856	0.487677		195.485	7.17939	190.085	13.2545	123.503	157.351
401-29	284.906	3567.36	1.14101	20.9241	7.57089	0.0881739	7.77066	0.0133809	1.75063	0.225287		85.6867	1.49013	85.8009	6.39345	89.0019	179.654
401-30	259.003	40284.7	2.67567	9.52789	0.351121	4.11001	6.18744	0.284013	6.17747	0.998389		1611.54	88.0896	1656.29	50.5733	1713.51	6.45778
401-31	440.861	6755.85	1.09908	21.8025	6.25572	0.0852358	6.44814	0.013478	1.56347	0.242468		86.3046	1.34035	83.0556	5.1424	-9.38021	151.16
401-33	207.253	4278.92	1.2616	21.8287	8.08272	0.0848236	9.18252	0.013429	4.35756	0.47455		85.9928	3.72231	82.6698	7.29049	-12.2884	195.53
401-34	297.026	8308.28	1.78792	22.8114	10.9099	0.101051	11.0692	0.0167183	1.87149	0.169071		106.882	1.98379	97.7458	10.3156	-119.78	269.747
401-35	447.206	10889	1.30945	21.7954	10.8267	0.0954953	10.9628	0.0150955	1.72203	0.157079		96.5844	1.65082	92.6096	9.70368	-8.60022	262.036
401-36	131.369	3363.89	1.86727	30.4149	28.978	0.0699575	29.2222	0.0154319	3.77022	0.129019		98.7206	3.69363	68.6591	19.4028	-885.906	851.761
401-37	66.9694	7411.24	3.47668	20.1175	24.9974	0.213968	25.4404	0.0312192	4.72665	0.185794		198.174	9.22451	196.877	45.5602	181.333	590.562
401-38	150.742	4633.23	1.22349	23.9652	21.1986	0.0843023	21.5057	0.0146527	3.62123	0.168385		93.7722	3.37113	82.1818	16.979	-242.95	540.701
401-39	81.9269	3805.97	1.18879	27.9147	29.4944	0.114223	29.7675	0.0231251	4.02324	0.135155		147.376	5.86204	109.821	30.9947	-644.371	823.737
401-40	104.738	2486.35	1.23417	23.6403	55.0392	0.0812499	55.3416	0.0139308	5.7775	0.104397		89.1837	5.11711	79.3194	42.2503	-208.581	1485.21
401-42	1501.87	30009.5	0.986177	20.269	1.20958	0.201149	1.98672	0.0295697	1.57606	0.793298		187.855	2.91799	186.098	3.37823	163.832	28.2996
401-43	57.7045	1338.65	1.46848	16.5588	23.2379	0.123178	24.6747	0.0147932	8.29686	0.33625		94.6645	7.7968	117.949	27.4835	617.587	507.943
401-44	56.575	1792.59	2.31861	22.6099	19.5692	0.161789	20.0978	0.0265306	4.57914	0.227843		168.798	7.62916	152.268	28.4258	-97.9362	484.512
401-45	81.9273	1225.41	1.45888	29.337	27.8719	0.0668766	28.5449	0.0142295	6.16196	0.215869		91.0825	5.573	65.7312	18.1704	-782.765	800.125
401-46	104.203	1561.13	1.23595	28.6804	28.8595	0.0739299	29.0242	0.0153781	3.08778	0.106386		98.3794	3.01467	72.4219	20.2905	-719.222	818.235
401-47	119.552	1518.68	1	27.661	28.231	0.0704448	28.7096	0.0141324	5.22046	0.181837		90.4654	4.68973	69.1214	19.1864	-619.385	783.123
401-48	541.561	6108.35	2.99287	21.7698	3.91815	0.108177	4.11375	0.01708	1.25343	0.304693		109.175	1.35692	104.297	4.07753	-5.76171	94.578
401-49	140.824	11199.4	2.49658	19.8346	5.51372	0.343512	7.33195	0.0494155	4.83284	0.659149		310.932	14.6703	299.829	19.0371	214.287	127.784
401-50	271.329	4310.3	2.20119	22.3731	12.097	0.0827137	12.9127	0.0134216	4.51664	0.349782		85.9455	3.85609	80.6931	10.0167	-72.1461	296.548
401-51	287.732	1493.88	2.31095	21.8677	13.4276	0.0881226	13.8855	0.0139762	3.53667	0.254702		89.4725	3.14249	85.753	11.4188	-16.5961	325.923
401-52	273.956	9318.44	6.24608	21.6944	5.00935	0.11141	5.92142	0.0175296	3.15747	0.533228		112.024	3.50657	107.254	6.02714	2.59661	120.728
401-53	258.453	6824.95	1.31519	22.0558	13.2551	0.0841903	14.5948	0.0134674	6.10834	0.418528		86.2368	5.23256	82.0769	11.5081	-37.3466	322.966
401-54	288.523	4822.77	1.84949	21.8235	7.00013	0.0947227	8.79681	0.0149926	5.32748	0.605615		95.9313	5.07288	91.8932	7.72882	-11.7097	169.261
401-55	156.143	82642.2	1.72799	8.86445	0.500249	5.25375	1.69948	0.337769	1.62419	0.955697		1875.93	26.436	1861.38	14.4979	1845.16	9.05014
401-56	159.995	2226.21	1.78908	24.3668	21.4671	0.109529	21.6136	0.0193565	2.51249	0.116246		123.588	3.07555	105.535	21.6678	-285.124	552.257
401-57	310.006	5197.27	1.19004	20.347	11.4624	0.0973146	11.751	0.0143608	2.58825	0.220259		91.9169	2.36216	94.2945	10.582	154.886	269.135
401-58	486.078	15574.9	1.77795	20.7527	3.94703	0.155476	4.15099	0.023401	1.28516	0.309605		149.115	1.89438	146.735	5.67136	108.438	93.2462
401-59	65.7229	1261.06	1.7787	35.6911	49.5874	0.0586953	50.288	0.0151937	8.36492	0.16634		97.208	8.07038	57.9147	28.3165	-1374.06	1685.05
401-60	486.175	13225.6	4.04366	21.528	6.132	0.108658	6.89866	0.0169654	3.16071	0.458163		108.449	3.39908	104.737	6.86541	21.0821	147.311
401-61	94.9543	2179.45	2.22828	23.3954	24.6649	0.104011	24.9272	0.0176486	3.60637	0.144676		112.778	4.03182	100.473	23.8501	-182.505	623.796
401-62	251.68	6577.3	2.18923	22.1663	6.13896	0.140562	6.43018	0.0225975	1.91322	0.297537		144.051	2.72544	133.544	8.04657	-49.4972	149.498
401-63	141.741	5303.64	1.24059	22.6189	13.8401	0.112436	14.3368	0.0184449	3.74102	0.260939		117.82	4.36764	108.191	14.7144	-98.914	341.349
401-64	79.2492	45567.5	2.04647	8.89557	0.703863	5.21106	1.57478	0.336201	1.40872	0.894553		1868.37	22.8492	1854.43	13.4163	1838.81	12.7464
401-65	143.841	1926.1	3.27106	19.6753	8.59637	0.165545	8.95109	0.023623	2.4949	0.278725		150.513	3.71165	155.545	12.9097	232.889	198.731
401-66	71.7593	2419.52	1.92233	18.6417	11.6743	0.366121	14.2588	0.0495004	8.1869	0.574164		311.454	24.8924	316.774	38.8204	356.112	264.397
401-67	302.774	4373.88	1.2487	22.7957	11.111	0.0821455	12.0949	0.0135811	4.77821	0.395061		86.9603	4.12724	80.16	9.32269	-118.078	274.649
401-68	334.331	5179.9	2.42706	22.021	8.38795	0.0977716	8.80093	0.0156152	2.66433	0.302733		99.8843	2.64073	94.7173	7.95917	-33.5162	203.759
401-69	105.976	1145.75	2.2085	28.0297	16.8542	0.11702	18.1936	0.0237891	6.85144	0.376585		151.559	10.2628	112.367	19.3553	-655.668	466.209
401-70	110.834	1408.69	1.83947	30.8779	21.2688	0.0738095	21.6617	0.0165295	4.1068	0.189588		105.685	4.30487	72.3081	15.1196	-929.79	626.277
401-71	174.286	2987.69	2.6534	23.8407	19.9492	0.0824101	20.0977	0.0142495	2.43831	0.121323		91.2097	2.20832	80.4084	15.5381	-229.812	506.943
401-72	841.697	23703.5	1.45467	20.1208	1.81787	0.191626	2.18492	0.027964	1.21212	0.554767		177.793	2.12562	178.016	3.56765	180.95	42.3665
401-73	51.6893	1943.94	1.75174	20.5699	29.9108	0.121741	30.635	0.0181622	6.62174	0.21615		116.031	7.61451	116.649	33.7717	129.316	717.784
401-74	45.1212	1037.71	1.95303	66.8537	55.4743	0.0399744	55.7602	0.0193823	5.63895	0.101129		123.751	6.91171	39.7991	21.7661	NA	NA
401-75	189.991	14440.4	1.55499	19.9202	6.59505	0.194166	6.80306	0.0280522	1.6694	0.24539		178.346	2.9365	180.178	11.2321	204.255	153.165
401-76	118.387	40001.4	0.71313	11.4809	0.987308	2.88373	1.3826	0.240122	0.967891	0.70005		1387.33	12.0813	1377.67	10.4243	1362.71	19.0194
401-77	521.838	156344	0.931136	9.5804	0.135485	4.24654	1.29954	0.295065	1.29246	0.994551		1666.79	18.9829	1683.07	10.6807	1703.4	2.49325
401-78	86.2745	6750.72	2.40458	22.7514	14.2067	0.202421	15.3855	0.0334012	5.90616	0.383879		211.8	12.306	187.172	26.3049	-113.288	351.427
401-79	259.953	4661.93	1.24309	23.2205	12.8121	0.0838403	12.8803	0.0141197	1.32386	0.102782		90.3845	1.18822	81.7491	10.1172	-163.812	319.804
401-80	260.98	10762.6	2.17517	20.5522	8.16293	0.167881	8.84863	0.0250242	3.41539	0.385979		159.331	5.37507	157.579	12.9162	131.296	192.238
401-81	469.565	10804.4	4.18417	20.6626	4.91383	0.113186	5.16182	0.0169619	1.5807	0.30623		108.427	1.69957	108.875	5.32918	118.698	115.896
401-82	226.603	12458.8	1.91451	19.4182	3.50092	0.274364	4.08725	0.0386397	2.1093	0.516068		244.396	5.05854	246.177	8.93523	263.193	80.3945
401-83	933.105	391989	3.60427	9.04433	0.744404	4.70919	2.94258	0.308902	2.84687	0.967472		1735.3	43.3117	1768.87	24.6499	1808.73	13.5283
401-85	292.859	104181	3.92377	11.3603	0.474618	3.01165	3.44862	0.248138	3.4158	0.990484		1428.87	43.7772	1410.57	26.2938	1383.03	9.11689
401-86	416.063	4247.61	1.74588	21.527	9.29174	0.0869634	9.59244	0.0135775	2.38296	0.248421		86.9372	2.05778	84.6707	7.79272	21.231	223.455
401-87	389.997	16859.5	2.83467	21.1162	11.0099	0.094213	11.0829	0.0144286	1.2695	0.114546		92.3482	1.164	91.4204	9.68957	67.2498	262.69
401-88	56.8998	3873.52	2.92016	23.6416	35.9971	0.13715	36.4188	0.0235165	5.52623	0.151741		149.842	8.18511	130.503	44.6287	-208.712	929.258
401-89	79.2329	2319.02	2.82991	22.7331	18.4512	0.125805	20.2928	0.0207423	8.44701	0.416256		132.345	11.0653	120.322	23.0294	-111.303	457.594
401-90	437.689	8506.73	2.96945	22.0023	7.52688	0.0950077	8.53214	0.015161	4.01788	0.470911		97.0003	3.86818	92.1576	7.51688	-31.4632	182.738
401-91	209.816	3867	2.03081	23.1663	11.4314	0.0844622	11.6012	0.0141911	1.97783	0.170484		90.8388	1.78403	82.3315	9.17473	-157.991	284.823
401-93	71.4982	21725.6	2.04561	13.3389	2.77932	1.84002	3.52776	0.178009	2.17267	0.615878		1056.09	21.1645	1059.87	23.2117	1067.68	55.8788
401-94	276.335	10908.6	1.76049	20.9249	8.12101	0.10488	8.42819	0.0159167	2.25467	0.267516		101.798	2.27718	101.271	8.12365	88.9112	192.764
401-95	1059.49	79064.2	22.9538	20.5949	2.10972	0.152293	2.68778	0.0227478	1.66531	0.619583		144.999	2.38771	143.935	3.60698	126.459	49.6659
401-96	72.8697	5748.61	1.89037	21.65	26.4592	0.143464	26.7818	0.0225268	4.14426	0.154742		143.606	5.88559	136.125	34.1314	7.52928	646.594
401-97	368.783	14362.9	1.21025	21.4598	7.36296	0.112078	7.56147	0.0174439	1.72126	0.227635		111.481	1.90238	107.864	7.73801	28.7223	176.71
401-98	187.525	2936.45	1.29067	23.7769	15.9325	0.0861173	16.914	0.0148506	5.67802	0.3357		95.0295	5.35622	83.88	13.6181	-223.064	403.127
401-99	195.499	3796.97	1.03664	22.6144	12.7883	0.0892625	13.2627	0.0146404	3.51556	0.265071		93.694	3.27005	86.8161	11.0361	-98.4317	315.199
401-100	100.26	2518.25	1.64731	22.3796	15.9311	0.156817	17.0256	0.0254532	6.00588	0.352755		162.029	9.60997	147.913	23.4389	-72.8494	391.473
401-102	182.015	5791.82	2.02573	21.18	6.72863	0.193181	7.3946	0.0296749	3.06686	0.414743		188.513	5.69772	179.34	12.1569	60.0694	160.502
401-103	226.249	8675.04	1.60857	21.3693	10.8261	0.168173	11.0353	0.0260642	2.13823	0.193763		165.868	3.5014	157.832	16.1324	38.8119	259.665
401-104	120.191	2674.25	1.89379	22.7956	21.1233	0.120896	21.7965	0.0199877	5.37514	0.246606		127.578	6.79009	115.884	23.875	-118.067	525.74
401-105	113.263	3021.79	2.709	20.8554	11.9864	0.195534	14.0275	0.0295759	7.28664	0.519456		187.894	13.4936	181.34	23.2994	96.7425	284.557
Sample SLO-402
402-1	66.8906	4090.95	2.08337	27.6699	34.9178	0.117121	35.0989	0.0235039	3.56144	0.101469		149.763	5.27223	112.458	37.3812	-620.267	977.62
402-2	111.402	11757.9	1.40151	19.4662	13.6807	0.215772	13.9035	0.0304631	2.47898	0.178299		193.446	4.72425	198.384	25.0602	257.527	315.683
402-3	94.2853	3909.6	2.44972	27.8343	32.5617	0.069795	33.7493	0.0140897	8.87406	0.262941		90.1944	7.94818	68.5049	22.3609	-636.461	911.613
402-4	137.394	4186.85	1.1617	22.8903	9.21494	0.0942093	10.3614	0.0156402	4.73735	0.457213		100.043	4.70281	91.417	9.0584	-128.296	228.046
402-5	40.4253	4090.27	1.38554	23.4138	36.4496	0.201029	37.5347	0.0341374	8.96005	0.238714		216.391	19.067	185.997	63.8765	-184.474	937.251
402-6	141.584	7247.92	1.75981	22.7314	17.6842	0.0923465	18.087	0.0152246	3.79561	0.209853		97.4043	3.66929	89.6869	15.5271	-111.118	438.299
402-7	52.6007	943.476	1.4162	24.4638	28.9388	0.152656	29.4054	0.0270855	5.21766	0.177439		172.282	8.87002	144.255	39.5632	-295.26	752.063
402-8	439.352	17361.1	1.9217	20.8173	3.3949	0.0974287	3.77444	0.0147099	1.64954	0.43703		94.1356	1.54152	94.4	3.40247	101.086	80.2905
402-9	472.106	11602.8	1.55751	21.0127	5.43958	0.0963493	6.0039	0.0146835	2.54122	0.423261		93.9677	2.3706	93.4009	5.35756	78.9232	129.25
402-10	202.197	20798.6	2.13818	19.6687	4.72011	0.219784	4.97613	0.0313524	1.57557	0.316626		199.007	3.0876	201.73	9.10431	233.705	108.973
402-11	128.434	7635.49	1.50713	19.0419	8.73385	0.215094	8.98308	0.0297055	2.10133	0.23392		188.705	3.90782	197.818	16.1477	307.912	199.23
402-12	82.5108	10171	2.76133	21.5583	18.4248	0.189522	18.7501	0.0296328	3.47738	0.18546		188.25	6.45151	176.221	30.3424	17.698	445.838
402-13	135.075	13187	1.8179	21.867	21.6365	0.149666	21.8457	0.0237361	3.01578	0.13805		151.225	4.50755	141.617	28.8844	-16.5182	528.429
402-14	80.9513	15376.3	1.24153	18.3814	11.9982	0.174438	12.9349	0.0232551	4.83262	0.373612		148.195	7.08003	163.263	19.51	387.742	270.249
402-15	111.114	5399.8	1.75997	29.1506	22.6807	0.0830602	22.8917	0.0175606	3.10157	0.135489		112.22	3.45048	81.018	17.8276	-764.787	645.122
402-16	285.239	23431.4	1.26949	20.6286	4.9527	0.196419	5.10772	0.0293867	1.24884	0.2445		186.709	2.29825	182.091	8.51465	122.575	116.74
402-17	83.1203	3454.17	0.866307	23.1871	23.8692	0.0983266	24.0987	0.0165354	3.31803	0.137685		105.723	3.4793	95.2305	21.9094	-160.226	600.556
402-18	431.716	21738.9	1.78189	20.7196	3.46831	0.121149	4.14595	0.0182054	2.2715	0.547886		116.304	2.61816	116.114	4.54898	112.188	81.8918
402-19	287.721	48838.3	1.78609	18.9561	2.40531	0.405853	2.9477	0.0557979	1.70395	0.57806		350.019	5.80512	345.885	8.64078	318.183	54.6851
402-20	65.7962	22434.9	2.46142	22.3392	10.0644	0.148758	10.5411	0.0241017	3.13432	0.297343		153.527	4.75518	140.815	13.861	-68.4419	246.288
402-21	129.464	16844.3	1.91581	21.1731	7.44405	0.261638	7.66819	0.0401776	1.84045	0.240011		253.934	4.58268	235.986	16.1483	60.8521	177.58
402-22	94.4777	7977.29	1.92291	22.5757	13.9697	0.192114	14.3575	0.0314557	3.31449	0.230854		199.652	6.51603	178.431	23.4978	-94.2263	344.249
402-23	86.2163	18625	1.38775	18.1054	8.79435	0.421962	9.07904	0.0554091	2.25574	0.248456		347.645	7.63428	357.453	27.3628	421.606	196.64
402-24	281.026	19772.6	1.69894	20.3332	3.79386	0.178498	4.08262	0.0263232	1.50812	0.369401		167.495	2.4935	166.767	6.27884	156.469	88.817
402-25	447.09	42517.3	12.1286	11.1893	0.833124	0.569433	2.22801	0.0462108	2.06638	0.927456		291.216	5.88373	457.648	8.20836	1412.11	15.9403
402-26	55.7013	3644.85	1.38122	18.8931	23.8602	0.197852	24.4972	0.0271107	5.54985	0.22655		172.44	9.4433	183.307	41.1074	325.768	548.593
402-27	57.8165	2059.03	2.47971	19.0341	14.71	0.235351	15.4681	0.0324898	4.78308	0.309222		206.112	9.70259	214.606	29.9308	308.884	336.533
402-28	177.218	11211.8	1.58168	23.5348	12.7819	0.0963213	12.9695	0.0164411	2.19831	0.169498		105.125	2.29222	93.3749	11.5707	-197.369	321.173
402-29	448.44	32110.8	1.32704	20.4557	4.66491	0.178252	5.83413	0.0264453	3.50366	0.600545		168.262	5.81906	166.556	8.96219	142.392	109.523
402-30	167.265	13274.9	1.28234	20.2351	9.97386	0.20046	10.1555	0.0294193	1.91237	0.188308		186.913	3.52315	185.515	17.2209	167.737	233.466
402-31	81.9236	7108.1	2.53763	20.7057	17.6202	0.20417	17.7917	0.0306606	2.46446	0.138518		194.681	4.72613	188.649	30.6396	113.774	418.51
402-32	140.575	143361	2.25128	6.08767	0.260709	9.9047	2.87818	0.437311	2.86635	0.995889		2338.59	56.2209	2425.95	26.5506	2500.04	4.38902
402-33	123.097	8743.96	1.73495	21.2155	10.2404	0.146364	11.0337	0.0225209	4.10827	0.372337		143.568	5.83298	138.696	14.3051	56.078	244.755
402-34	499.734	22444.2	0.568153	20.4646	2.88364	0.166426	3.12771	0.0247015	1.21129	0.387275		157.301	1.88231	156.312	4.53131	141.349	67.7052
402-35	315.028	19199.3	2.08717	20.0881	5.98232	0.0995663	6.19717	0.0145061	1.61765	0.261031		92.8404	1.49107	96.3759	5.69795	184.746	139.428
402-36	411.738	10789.1	1.62744	20.4021	5.14893	0.0988544	5.45831	0.0146274	1.81153	0.331885		93.6116	1.68355	95.7183	4.98594	148.525	120.776
402-37	148.611	9782.61	1.41255	22.5542	25.796	0.0935252	25.9021	0.0152987	2.34227	0.0904276		97.875	2.27518	90.7819	22.4976	-91.8827	641.891
402-38	158.76	14775.7	1.80295	20.6895	7.21357	0.197024	7.44072	0.0295644	1.82448	0.245202		187.822	3.37733	182.605	12.4361	115.654	170.317
402-39	100.374	9913.02	2.20301	21.2785	6.58853	0.202304	7.11567	0.0312208	2.68775	0.377723		198.184	5.24566	187.074	12.1578	48.9892	157.489
402-40	376.165	70585.3	1.01923	20.1574	5.04682	0.158802	5.15678	0.0232162	1.05926	0.205411		147.95	1.54933	149.654	7.17567	176.714	117.759
402-41	194.6	13889.5	0.987244	20.3083	6.75199	0.168738	6.93043	0.0248535	1.56253	0.225459		158.257	2.4427	158.324	10.1602	159.328	158.126
402-42	59.4755	6538.22	2.43409	20.845	19.2474	0.22917	19.7705	0.0346464	4.51777	0.228511		219.563	9.75234	209.513	37.4447	97.9686	459.106
402-43	232.897	10285.5	1.69574	20.6651	10.4279	0.101026	10.7716	0.0151415	2.69927	0.250592		96.8767	2.59542	97.7228	10.036	118.406	246.376
402-44	528.914	30874.6	1.83425	20.9098	5.27327	0.099932	5.48465	0.0151549	1.508	0.27495		96.9621	1.45125	96.7136	5.05966	90.6028	125.018
402-45	447.254	27744.1	3.3141	20.5443	2.74097	0.170778	3.16861	0.0254462	1.58972	0.501707		161.984	2.54301	160.094	4.6931	132.206	64.4568
402-46	179.636	9321.42	1.21046	21.4158	9.25453	0.160094	9.35502	0.0248662	1.36747	0.146175		158.337	2.13885	150.786	13.1094	33.6412	222.038
402-47	102.812	9033.13	1.76817	24.5109	21.9484	0.145318	22.1871	0.0258332	3.24539	0.146274		164.417	5.2685	137.77	28.5916	-300.173	566.602
402-48	230.109	34053	1.37537	18.9659	2.58301	0.40389	2.99168	0.0555566	1.50938	0.504525		348.546	5.12118	344.466	8.7395	317.012	58.7239
402-49	31.8705	21836.1	1.19331	5.49311	1.28188	12.4223	2.77063	0.494902	2.45625	0.886532		2591.85	52.4212	2636.87	26.0423	2671.59	21.2223
402-50	308.884	13006	1.44041	21.6015	10.3595	0.0958992	11.0308	0.0150244	3.78935	0.343524		96.1331	3.6158	92.9839	9.80158	12.9362	249.64
402-51	401.731	81662.7	1.35912	20.3743	7.99146	0.124446	8.08713	0.0183892	1.24024	0.153359		117.468	1.44368	119.095	9.08823	151.71	187.489
402-52	186.108	6160.21	1.79473	20.54	12.0117	0.10494	12.2431	0.0156329	2.36865	0.193469		99.9966	2.3503	101.326	11.8071	132.693	283.268
402-53	305.789	20580.3	1.40395	20.315	4.78738	0.201201	4.92347	0.0296446	1.14962	0.233497		188.323	2.13368	186.142	8.37386	158.541	112.064
402-54	202.826	11812	1.34801	19.7547	6.82925	0.160211	7.31888	0.0229542	2.63199	0.359616		146.299	3.80722	150.888	10.2623	223.601	158.065
402-55	208.607	26853.8	1.38461	19.9651	6.38446	0.206163	6.47789	0.0298525	1.09624	0.169227		189.625	2.04846	190.327	11.2431	199.044	148.438
402-56	214.042	13160.2	3.43542	24.5464	16.3944	0.0814241	16.6647	0.0144957	2.98914	0.179369		92.7745	2.7533	79.4829	12.7411	-303.875	421.644
402-57	327.657	17563.1	1.63019	20.5037	3.2995	0.204006	3.69434	0.0303371	1.66175	0.449811		192.657	3.15413	188.51	6.35604	136.896	77.542
402-58	113.206	10179.8	1.25913	21.2342	8.72167	0.182024	8.8154	0.0280326	1.28209	0.145437		178.223	2.25368	169.801	13.7848	54.0033	208.408
402-59	327.83	33991	1.52943	20.8708	4.33907	0.196273	5.30149	0.0297096	3.04603	0.574561		188.731	5.66545	181.967	8.83219	95.0144	102.766
402-60	131.301	6200.47	1.10281	22.3177	12.1387	0.134519	12.3351	0.0217737	2.19285	0.177773		138.856	3.01234	128.15	14.8517	-66.0808	297.213
402-61	96.2264	11590.6	1.95911	21.3067	12.4662	0.182728	12.7406	0.0282372	2.62982	0.206413		179.506	4.65557	170.406	19.9892	45.8482	298.864
402-62	132.149	180164	1.35836	8.75987	0.393449	5.36575	1.72815	0.3409	1.68277	0.973738		1891	27.5788	1879.4	14.7919	1866.6	7.1011
402-63	171.125	21403.4	2.20361	19.6123	6.17876	0.217267	7.00279	0.0309044	3.29575	0.470634		196.206	6.36906	199.633	12.6921	240.309	142.54
402-64	563.67	29235.6	2.25614	20.995	7.28509	0.0965191	7.59373	0.014697	2.14296	0.282201		94.0533	2.00089	93.5581	6.78717	80.9289	173.115
402-65	162.23	11276.1	1.21086	21.9335	5.24327	0.167771	5.32323	0.0266886	0.919183	0.172674		169.79	1.54031	157.483	7.76558	-23.8731	127.014
402-66	259.886	23362.6	1.32752	20.3457	5.33989	0.205343	5.43091	0.0303006	0.990138	0.182315		192.429	1.87716	189.637	9.39471	155.03	125.132
402-67	458.393	8900.89	3.03503	19.0887	4.89914	0.2212	7.06871	0.0306239	5.09559	0.720866		194.452	9.76052	202.908	13.0015	302.337	111.722
402-68	320.295	15178.3	2.02103	22.1665	11.231	0.0998308	11.4653	0.0160495	2.30601	0.20113		102.64	2.34814	96.6201	10.5674	-49.5189	273.987
402-69	92.4588	4516.58	1.80829	24.8639	18.2142	0.128654	18.8141	0.0232002	4.71336	0.250522		147.849	6.88937	122.888	21.7793	-336.855	472.173
402-70	173.906	15726.4	1.15771	21.4341	10.9125	0.122485	11.1728	0.0190408	2.39745	0.214579		121.591	2.88776	117.322	12.3798	31.6117	262.124
402-71	81.3038	9046.18	1.99049	20.6508	20.0482	0.203167	20.3921	0.0304291	3.72919	0.182874		193.233	7.0991	187.803	34.9777	120.075	476.579
402-72	122.626	8324.45	1.0904	21.3524	13.5592	0.17148	13.9187	0.0265558	3.14271	0.225791		168.956	5.24082	160.703	20.6903	40.7509	325.571
402-73	155.087	8650.67	1.1612	26.2289	17.3377	0.081978	17.7131	0.0155947	3.62747	0.20479		99.7539	3.59069	80.0029	13.6279	-476.438	462.096
402-75	67.8838	1305.15	1.0373	24.3614	18.7978	0.147739	19.155	0.0261033	3.68225	0.192234		166.114	6.03859	139.913	25.041	-284.562	482.455
402-76	344.641	27432.9	2.27532	19.9852	4.95906	0.101673	5.40993	0.0147371	2.1622	0.399673		94.3085	2.0243	98.3197	5.06966	196.738	115.3
402-77	933.44	53818.5	0.934402	20.7416	2.26515	0.111874	3.83476	0.0168294	3.09427	0.8069		107.587	3.3014	107.678	3.91781	109.708	53.479
402-78	137.981	11934.7	1.76818	20.0657	11.9185	0.176332	12.1666	0.0256617	2.44426	0.200899		163.339	3.94228	164.9	18.5203	187.337	278.269
402-79	82.856	5581.67	1.18166	21.2305	17.4769	0.19774	18.0777	0.0304476	4.62184	0.255665		193.349	8.8036	183.212	30.3133	54.3878	419.674
402-80	222.655	21081	1.58646	22.1317	9.33309	0.0911837	9.65386	0.0146363	2.46789	0.255638		93.6679	2.29491	88.6055	8.19144	-45.7008	227.329
402-81	487.163	18546.4	1.808	20.863	6.33866	0.0971134	6.49424	0.0146945	1.41302	0.21758		94.0378	1.31913	94.1083	5.83702	95.906	150.17
402-82	130.086	4747.89	1.6505	20.8253	14.0653	0.115833	15.0026	0.0174954	5.2198	0.347926		111.807	5.78578	111.287	15.8148	100.177	334.09
402-83	202.148	9957.53	0.998362	20.5717	7.51501	0.146761	7.69633	0.0218967	1.66075	0.215785		139.632	2.294	139.048	10.0015	129.112	177.012
402-84	100.209	5125.71	1.3867	26.5503	22.5328	0.0839321	22.94	0.0161621	4.30318	0.187584		103.354	4.41206	81.835	18.0383	-508.814	607.177
402-85	436.481	30111.3	0.857165	20.8108	6.71234	0.165386	6.89117	0.0249625	1.55972	0.226336		158.943	2.44875	155.407	9.9304	101.843	158.86
402-86	310.376	16587	3.02586	20.0554	8.86093	0.105288	9.1383	0.0153147	2.23438	0.244508		97.9766	2.17262	101.646	8.83912	188.536	206.53
402-87	127.661	10393.4	1.1756	20.4706	11.1087	0.15309	11.6474	0.0227288	3.50133	0.30061		144.879	5.01613	144.637	15.7028	140.638	261.468
402-88	639.649	244618	1.37869	18.3611	0.655591	0.443089	2.16707	0.0590051	2.06553	0.953142		369.572	7.41892	372.428	6.75628	390.215	14.7146
402-89	310.994	16367.2	1.54457	20.7736	7.56482	0.101233	8.15671	0.0152521	3.05049	0.373985		97.5793	2.95423	97.9137	7.61369	106.04	178.958
402-90	181.652	10176.4	1.28568	19.7573	6.97958	0.189457	7.96196	0.027148	3.83122	0.481191		172.674	6.5277	176.166	12.8776	223.296	161.55
402-91	225.612	9827.83	1.95755	23.6684	12.3512	0.091404	12.8153	0.0156904	3.41729	0.266658		100.361	3.40308	88.8104	10.8982	-211.564	311.144
402-92	83.1483	2812.41	1.78234	29.4593	21.6529	0.0734699	22.2105	0.0156975	4.9459	0.222683		100.407	4.92755	71.9869	15.4363	-794.546	619.278
402-93	170.372	11437.8	1.73827	19.9664	6.77839	0.213924	7.09651	0.0309783	2.10091	0.296049		196.669	4.06945	196.84	12.6989	198.896	157.583
402-94	90.4172	2480.56	1.18866	20.8378	19.584	0.190689	20.0599	0.0288189	4.34339	0.216521		183.152	7.84306	177.217	32.6314	98.7522	467.202
402-95	412.056	13097.3	1.18878	20.0814	5.19264	0.10141	5.56307	0.0147698	1.99606	0.358806		94.516	1.87284	98.0775	5.20094	185.525	120.967
402-96	156.918	12504.2	2.13665	20.004	7.54199	0.20813	7.69326	0.0301959	1.5181	0.197328		191.774	2.86845	191.982	13.4582	194.556	175.534
402-97	537.858	42571.1	2.36753	20.1101	3.29786	0.209877	3.63655	0.030611	1.53251	0.421419		194.371	2.93429	193.449	6.40543	182.195	76.8522
402-98	290.688	27410.4	1.74781	20.0719	4.41813	0.212603	4.59995	0.0309498	1.2805	0.278372		196.49	2.4781	195.735	8.18923	186.617	102.871
402-99	296.943	15751.9	2.10631	19.4635	13.4475	0.107802	13.7804	0.0152177	3.01102	0.2185		97.3605	2.90952	103.953	13.6171	257.814	310.239
402-100	411.73	59956.7	1.79669	20.4658	4.3932	0.16572	4.56712	0.0245981	1.24834	0.273331		156.651	1.93196	155.698	6.59263	141.217	103.156
402-101	258.898	36051.5	1.94252	20.0386	6.87045	0.17752	7.05069	0.0257996	1.58402	0.224662		164.206	2.56821	165.924	10.7934	190.533	159.98
402-102	167.62	11782.5	1.61842	21.1688	11.0966	0.0989088	11.8462	0.0151855	4.14712	0.35008		97.1563	3.99898	95.7686	10.8268	61.3347	265.084
402-103	203.028	32031.6	1.9443	18.7578	3.98315	0.417432	4.84331	0.0567893	2.75538	0.568904		356.07	9.54504	354.213	14.4839	342.066	90.1724
402-104	503.764	29723.3	10.7914	18.7776	7.76476	0.198469	11.2475	0.0270291	8.13727	0.723472		171.927	13.8053	183.83	18.9149	339.699	176.071
402-105	60.9275	4747.9	1.94857	20.5023	17.4112	0.179236	17.9682	0.0266519	4.43943	0.247071		169.559	7.42934	167.403	27.7376	137.05	411.723
Sample SLO-382
382-1	237.249	13203.8	1.9917	20.1599	8.38556	0.1736	8.49784	0.0253827	1.37685	0.162023		161.585	2.19713	162.538	12.7641	176.429	195.848
382-2	280.838	16190.5	1.42404	21.1113	4.95097	0.150363	5.11433	0.0230227	1.2823	0.250726		146.731	1.86027	142.232	6.78784	67.8398	117.86
382-3	38.6575	1434.6	2.40147	26.1591	67.9527	0.14044	68.4373	0.0266448	8.12952	0.118788		169.515	13.6011	133.435	85.7772	-469.386	2025.1
382-4	334.62	10086	1.83903	21.199	9.31607	0.08763	10.3638	0.0134731	4.54079	0.43814		86.2733	3.89139	85.2932	8.47872	57.9191	222.509
382-5	95.4191	52249.7	1.21689	9.62801	0.63908	4.42579	1.96168	0.309048	1.85466	0.945445		1736.02	28.2264	1717.18	16.2488	1694.26	11.7807
382-6	303.534	9197.47	1.59388	20.6501	9.30514	0.167449	9.51133	0.0250786	1.9697	0.20709		159.673	3.10645	157.202	13.8529	120.113	219.673
382-7	164.697	5769.7	1.20107	21.0088	17.0395	0.0886117	17.8038	0.0135018	5.16042	0.289849		86.4557	4.4317	86.2092	14.716	79.3661	407.144
382-8	117.597	7672.12	1.59175	20.1235	9.74782	0.170459	10.1987	0.0248783	2.99893	0.29405		158.414	4.69282	159.817	15.0824	180.643	227.613
382-9	77.531	3229.97	1.82206	26.2817	24.2577	0.122288	24.5719	0.0233096	3.91671	0.159398		148.539	5.75133	117.144	27.1926	-481.763	651.117
382-11	352.001	17804.3	1.27614	20.4445	6.63925	0.168644	6.73182	0.0250061	1.11256	0.165268		159.217	1.74969	158.242	9.86429	143.641	155.917
382-12	291.652	8085.14	1.35388	20.2175	3.79841	0.162419	4.02671	0.0238156	1.33657	0.331926		151.726	2.00424	152.818	5.71291	169.771	88.7266
382-13	60.1262	8057.65	1.80788	22.994	13.4482	0.138739	14.2168	0.0231373	4.61119	0.324348		147.453	6.72218	131.921	17.5894	-139.475	334.21
382-14	436.338	29725.2	1.18617	19.9385	3.50658	0.174032	3.80197	0.0251663	1.46931	0.386459		160.225	2.32518	162.912	5.72258	202.165	81.4392
382-15	314.732	4982.17	0.826177	20.7684	5.38072	0.159121	5.65166	0.0239679	1.72889	0.305908		152.684	2.60873	149.934	7.87797	106.678	127.201
382-16	175.369	2871.15	1.33948	19.6116	7.10998	0.187047	7.61239	0.0266051	2.71968	0.35727		169.265	4.54356	174.107	12.1802	240.394	164.083
382-17	83.1561	3125.47	1.20193	18.4295	24.5453	0.154249	25.0282	0.0206174	4.89301	0.1955		131.557	6.37184	145.656	33.9738	381.87	559.267
382-18	185.205	5042.93	1.2002	19.7918	9.75972	0.191848	10.0598	0.0275386	2.4387	0.242421		175.125	4.21329	178.205	16.4435	219.241	226.293
382-19	182.369	36264.3	1.32395	19.9277	6.71037	0.173626	7.20305	0.0250941	2.61818	0.363482		159.77	4.13166	162.561	10.8205	203.412	155.878
382-20	403.756	9794.77	0.941306	19.7349	2.3111	0.188566	2.40744	0.0269896	0.674209	0.280053		171.68	1.1422	175.405	3.87817	225.912	53.4451
382-22	233.871	5611.33	3.07825	21.3673	7.18035	0.15363	7.49962	0.0238081	2.16492	0.288671		151.679	3.24539	145.112	10.1413	39.0778	171.989
382-23	291.853	22613.4	1.30428	19.9574	3.2233	0.18342	3.33346	0.0265491	0.849881	0.254955		168.914	1.41692	170.999	5.24611	199.935	74.8708
382-24	474.164	4586.93	1.9526	20.2618	2.94443	0.162843	4.11548	0.0239302	2.87534	0.698663		152.447	4.33195	153.189	5.852	164.656	68.8559
382-25	241.114	11034.8	2.92477	21.5978	6.50387	0.148018	7.06176	0.0231859	2.75102	0.389566		147.759	4.01866	140.161	9.24531	13.298	156.491
382-26	131.244	2800.15	1.5571	24.6502	16.412	0.0940185	16.7146	0.0168086	3.16612	0.189422		107.455	3.37396	91.2399	14.5863	-314.681	423.01
382-27	494.177	16985.3	5.08218	20.6064	3.7713	0.122531	4.04194	0.0183125	1.45416	0.359768		116.982	1.68576	117.364	4.47992	125.097	88.8262
382-28	179.851	31436.4	1.82117	19.5144	7.90253	0.192265	8.3226	0.0272116	2.61067	0.313684		173.073	4.45825	178.56	13.6283	251.852	182.039
382-29	530.717	10059.7	0.617599	21.5507	7.0997	0.104971	7.21095	0.016407	1.26177	0.174979		104.908	1.31298	101.354	6.95579	18.5925	170.712
382-30	195.397	25337.3	2.09933	20.2449	6.22585	0.180481	7.62363	0.0265	4.39983	0.577131		168.606	7.32219	168.474	11.8354	166.608	145.575
382-31	121.111	22925.8	1.69839	19.1699	6.19491	0.35571	6.36811	0.0494554	1.47511	0.23164		311.177	4.48118	309.007	16.9672	292.648	141.574
382-32	238.202	19064.1	1.59081	20.8905	7.55826	0.178646	8.07406	0.027067	2.83956	0.351689		172.166	4.82404	166.895	12.4266	92.7829	179.225
382-33	220.497	11573.5	1.88366	21.1753	6.47504	0.167033	7.60443	0.0256525	3.98762	0.524382		163.281	6.42927	156.841	11.0518	60.5913	154.414
382-34	293.272	17745.9	1.58146	20.3693	3.52927	0.175914	4.03819	0.0259882	1.96247	0.485976		165.391	3.20446	164.539	6.13406	152.295	82.7003
382-35	376.847	6082.5	0.839241	20.2742	3.01236	0.171586	3.73858	0.0252303	2.21419	0.592254		160.627	3.51265	160.794	5.55964	163.227	70.4638
382-36	33.3357	1196.99	1.91222	21.1049	49.9949	0.125219	50.9436	0.0191669	9.78575	0.19209		122.389	11.8637	119.793	57.6262	68.5452	1263.12
382-37	138.128	4261.45	1.49385	22.0456	10.817	0.167354	10.9262	0.0267582	1.54057	0.140998		170.227	2.58814	157.12	15.9062	-36.2267	263.188
382-38	201.387	12751.9	3.69777	20.6001	4.5344	0.218811	6.26366	0.0326916	4.32119	0.689882		207.372	8.81835	200.919	11.4185	125.815	106.797
382-39	219.886	2101.62	1.23333	19.1644	12.0235	0.158263	13.3116	0.0219975	5.71261	0.429146		140.268	7.92641	149.181	18.4705	293.287	275.387
382-40	86.4335	1143.13	1.35189	18.7305	18.0466	0.17838	18.2159	0.0242323	2.47712	0.135987		154.349	3.778	166.666	28.006	345.369	411.204
382-41	431.963	21018.9	4.67437	20.8704	4.88839	0.121992	5.27391	0.0184654	1.97934	0.375307		117.95	2.3134	116.876	5.82248	95.0522	115.778
382-42	1026.25	8955.45	1.31284	20.4076	1.23446	0.154561	2.70483	0.0228766	2.4067	0.889779		145.81	3.46983	145.931	3.67667	147.892	28.9436
382-43	163.987	25667.6	1.57009	19.9958	5.56697	0.1908	6.00087	0.0276705	2.2404	0.373345		175.952	3.88871	177.311	9.7633	195.498	129.462
382-44	35.1565	1433.19	3.69586	20.0294	26.5939	0.16265	27.9711	0.0236277	8.66868	0.309916		150.542	12.8989	153.021	39.7527	191.601	628.28
382-45	90.3084	4043.49	2.51117	22.3692	14.4594	0.109057	16.1987	0.0176931	7.30219	0.450789		113.06	8.18388	105.103	16.1751	-71.7181	354.9
382-46	523.239	23742.9	0.889807	20.0745	3.32839	0.182188	3.38456	0.0265255	0.614066	0.181432		168.766	1.02288	169.941	5.29625	186.318	77.5044
382-47	188.225	17421.1	1.92908	20.1619	4.11398	0.183901	4.73585	0.0268915	2.34593	0.495356		171.064	3.96026	171.412	7.46971	176.193	95.9894
382-48	88.3573	27280.7	2.23022	13.7843	1.06367	1.73936	2.0664	0.173889	1.77161	0.857344		1033.51	16.9174	1023.23	13.3232	1001.29	21.5972
382-49	92.0744	5485.71	1.72943	22.7787	23.1874	0.155617	23.3403	0.0257089	2.66718	0.114273		163.636	4.30953	146.859	31.9244	-116.239	578.063
382-50	721.91	41332.2	1.26052	20.0707	1.94446	0.195459	2.0453	0.0284522	0.634301	0.310126		180.854	1.13122	181.276	3.39555	186.767	45.2498
382-51	128.212	9005.8	1.60549	22.0189	10.4317	0.170091	10.6187	0.0271628	1.98369	0.186811		172.767	3.38164	159.498	15.6746	-33.2835	253.627
382-52	280.498	23270.2	1.24778	21.3192	5.39654	0.112227	5.92272	0.0173527	2.4405	0.412058		110.903	2.68345	108	6.0682	44.4393	129.047
382-53	442.964	14591.2	1.25862	20.6382	4.82228	0.154074	5.19585	0.0230622	1.93455	0.372326		146.98	2.81123	145.503	7.04351	121.483	113.675
382-54	218.548	5803.08	1.8132	20.5676	9.35169	0.109646	9.47311	0.0163559	1.51185	0.159593		104.584	1.56839	105.641	9.50477	129.556	220.403
382-55	226.365	6111.28	1.87633	20.8476	7.00561	0.11308	7.22244	0.0170979	1.75645	0.243193		109.288	1.90341	108.779	7.45045	97.6728	165.949
382-56	195.593	7223.84	1.57599	20.4079	12.3036	0.145599	12.5103	0.0215505	2.26441	0.181004		137.448	3.07944	138.019	16.1458	147.874	289.387
382-57	85.5305	2426.92	2.13999	22.4909	17.3156	0.14449	17.4919	0.0235691	2.47678	0.141596		150.173	3.67647	137.035	22.4265	-84.9921	426.889
382-58	224.471	9206.23	1.76675	20.8831	8.05422	0.152139	8.74784	0.0230428	3.41382	0.390247		146.858	4.95678	143.799	11.7297	93.6418	190.989
382-59	86.7916	414.183	1.54762	17.4454	21.2715	0.13557	22.1599	0.0171532	6.21163	0.28031		109.639	6.75277	129.09	26.8688	503.905	472.946
382-60	788.165	18634.4	2.07395	20.4672	3.40194	0.108619	3.49584	0.0161236	0.804782	0.230211		103.11	0.823212	104.701	3.47781	141.062	79.8903
382-61	222.554	4787.83	1.73762	24.0875	13.6896	0.0871833	14.2866	0.0152308	4.08697	0.28607		97.4441	3.95257	84.8761	11.6335	-255.836	348.151
382-62	93.7138	3212.29	3.91762	23.1838	28.2383	0.106738	28.5546	0.0179473	4.23798	0.148417		114.67	4.81672	102.977	27.9697	-159.873	713.991
382-63	54.9563	4120.31	5.25953	21.8593	18.1618	0.256759	18.3119	0.0407062	2.34015	0.127794		257.209	5.90058	232.052	38.005	-15.6651	442.145
382-64	130.441	1628.22	2.22606	23.4703	10.9817	0.0978577	12.3792	0.0166576	5.71368	0.461556		106.497	6.03491	94.797	11.2044	-190.492	275.304
382-65	185.835	9467.95	1.54806	21.31	9.80944	0.166604	9.96136	0.0257493	1.73307	0.173979		163.89	2.80452	156.467	14.4457	45.507	234.896
382-66	150.7	8317.68	1.2022	20.3968	8.98622	0.176066	9.27493	0.0260458	2.2961	0.24756		165.753	3.75734	164.67	14.0998	149.119	210.982
382-67	96.2063	7968.88	1.45104	21.6389	26.0882	0.167359	26.1195	0.0262654	1.27889	0.0489631		167.132	2.10997	157.124	38.0401	8.76843	637.086
382-68	183.063	6614.53	1.39342	22.5384	5.80718	0.124487	6.14942	0.0203492	2.02287	0.328954		129.862	2.60067	119.132	6.91258	-90.1682	142.504
382-69	498.809	10657.6	0.970978	20.0076	3.77395	0.174013	4.11089	0.0252508	1.62993	0.396491		160.756	2.58781	162.895	6.18698	194.129	87.7616
382-70	301.019	5983.37	1.23143	20.4542	5.15613	0.166608	5.44857	0.0247159	1.76104	0.323212		157.392	2.73817	156.471	7.90117	142.569	121.064
382-71	51.2424	1521.64	1.38178	18.2135	19.0775	0.160477	20.3059	0.0211985	6.95554	0.342538		135.226	9.30772	151.12	28.5195	408.305	430.331
382-72	49.909	1251.92	2.16517	19.1881	22.0747	0.211045	22.2837	0.0293701	3.04464	0.136631		186.604	5.6	194.429	39.4503	290.471	509.769
382-74	205.415	5558.31	1.66815	22.1245	11.8636	0.103682	12.9335	0.0166371	5.15065	0.398243		106.367	5.43365	100.17	12.3375	-44.9023	289.265
382-75	575.337	29688.5	3.82304	19.9739	2.54346	0.178882	2.86722	0.0259136	1.32354	0.461611		164.922	2.15513	167.098	4.41765	198.048	59.0886
382-76	184.986	6507.17	1.7002	20.1375	7.4909	0.180443	7.75034	0.0263538	1.98853	0.256573		167.687	3.29152	168.441	12.03	179.026	174.837
382-77	208.354	4682.65	1.60305	21.5769	5.0495	0.158058	5.63876	0.0247345	2.5096	0.445062		157.509	3.90493	149.001	7.8146	15.6733	121.4
382-79	128.273	3009.57	1.27566	17.9449	11.5111	0.202046	11.8747	0.0262961	2.91591	0.245557		167.325	4.81628	186.856	20.2694	441.447	256.8
382-80	250.228	18354.6	1.73812	19.9031	5.89436	0.18323	6.25822	0.0264494	2.10281	0.336008		168.288	3.49299	170.836	9.84061	206.259	136.809
382-81	389.504	3571.91	1.38389	20.9404	3.36949	0.180582	5.30299	0.0274257	4.09491	0.772188		174.416	7.04643	168.561	8.2364	87.1499	79.9165
382-82	362.271	15304.5	1.22441	20.1516	3.20319	0.167776	3.88596	0.024521	2.20006	0.566156		156.166	3.39446	157.487	5.66895	177.387	74.7103
382-83	195.355	3822.02	1.00906	19.6835	7.46208	0.176347	7.71066	0.025175	1.9421	0.251872		160.279	3.07441	164.912	11.7374	231.92	172.491
382-84	208.847	7737.6	1.08408	22.3595	5.99275	0.173274	6.19104	0.0280991	1.55435	0.251065		178.64	2.73858	162.256	9.28408	-70.6559	146.503
382-85	181.478	58381.4	1.43877	16.5169	1.99224	0.826635	2.45184	0.099024	1.42916	0.582893		608.686	8.30104	611.743	11.2668	623.058	42.9604
382-86	121.388	1626.65	1.27011	20.2177	7.47311	0.175439	7.72045	0.0257252	1.93852	0.251089		163.738	3.13412	164.129	11.7009	169.745	174.695
382-87	83.198	101408	1.93135	8.29819	0.35451	5.94648	1.50871	0.357884	1.46646	0.972001		1972.13	24.9156	1968.05	13.1146	1963.74	6.32284
382-88	121.376	7628.16	1.96652	23.5588	13.0964	0.139175	13.4605	0.0237801	3.10944	0.231005		151.502	4.65595	132.309	16.6994	-199.921	329.281
382-89	681.579	26860.3	1.74057	20.0185	1.62461	0.19051	1.77721	0.0276598	0.720498	0.405409		175.885	1.25012	177.065	2.88772	192.865	37.7566
382-90	113.336	2335.29	3.03008	21.2594	15.8166	0.117223	16.1799	0.0180743	3.40958	0.210729		115.474	3.90214	112.551	17.2394	51.1584	379.574
382-92	951.18	4236.16	1.11492	19.4686	4.71248	0.172309	4.82935	0.0243299	1.05601	0.218664		154.963	1.61691	161.421	7.20762	257.24	108.356
382-93	227.682	8610.61	1.69504	20.671	8.90722	0.166072	9.13773	0.0248975	2.03952	0.223197		158.534	3.1939	156.004	13.2149	117.761	210.341
382-94	291.46	21577.2	1.3021	20.0004	6.09758	0.165853	6.84801	0.0240581	3.11686	0.455147		153.252	4.72032	155.813	9.89208	194.965	141.858
382-95	185.182	6349.4	1.01994	21.9287	15.2701	0.101902	15.4932	0.0162067	2.61972	0.169089		103.638	2.69331	98.5306	14.5492	-23.3412	371.516
382-96	173.221	12393.4	2.02875	19.5456	8.60214	0.180098	8.98924	0.0255303	2.60952	0.290293		162.513	4.1878	168.145	13.9306	248.156	198.334
382-97	660.628	7648.91	1.69158	20.2936	2.95876	0.13487	3.49298	0.0198506	1.85651	0.531498		126.712	2.32945	128.464	4.215	160.992	69.21
382-98	366.15	19018.8	1.47303	20.6886	4.64533	0.17716	5.1744	0.0265826	2.27932	0.4405		169.124	3.80476	165.614	7.90732	115.756	109.613
382-99	67.6799	2828.46	2.28857	25.9969	28.3247	0.14696	28.6479	0.0277088	4.29077	0.149776		176.193	7.45764	139.224	37.2879	-452.95	759.232
382-100	120.713	5669.98	1.7366	20.8527	18.6598	0.174583	18.776	0.0264035	2.08541	0.111068		168	3.45822	163.388	28.3441	97.0518	444.937
382-101	181.808	9409.61	2.12802	20.5391	5.35132	0.227047	5.67843	0.0338218	1.89945	0.334503		214.423	4.00587	207.758	10.6691	132.79	125.892
382-102	95.5846	5469.45	1.48374	21.6071	12.0317	0.191088	12.4791	0.0299454	3.31145	0.26536		190.207	6.20658	177.557	20.3311	12.2799	290.203
382-104	127.513	9513.88	1.90328	22.9507	18.7706	0.142393	19.1507	0.0237019	3.79643	0.19824		151.01	5.66635	135.173	24.2421	-134.814	467.775
382-105	298.558	7722.82	1.6385	20.6263	3.08779	0.170079	4.37759	0.0254431	3.10304	0.708847		161.965	4.96324	159.487	6.4611	122.822	72.768
Sample 11MB6
11MB6_1	242.568	4511.27	2.05671	17.3598	8.22853	0.26477	9.61662	0.0333358	4.97701	0.517543		211.392	10.3504	238.503	20.4441	514.727	181.018
11MB6_2	541.638	4002.62	0.997097	18.7028	14.5039	0.117111	14.5886	0.0158856	1.57009	0.107624		101.6	1.58271	112.45	15.5303	348.729	329.438
11MB6_3	395.949	16349.5	1.73767	20.2265	8.1758	0.105219	10.1376	0.0154352	5.99386	0.591253		98.7416	5.87334	101.582	9.79991	168.736	191.204
11MB6_4	309.292	35953.3	3.5128	20.9817	10.4269	0.204233	10.7872	0.0310788	2.76499	0.256321		197.296	5.3726	188.701	18.5782	82.4353	248.005
11MB6_5	528.521	16620.7	1.49878	23.4307	12.94	0.0865848	13.4133	0.0147138	3.53172	0.2633		94.1602	3.3013	84.3169	10.8533	-186.271	324.46
11MB6_6	142.42	4951.96	1.76277	8.13101	3.49624	4.92309	9.56414	0.290323	8.9022	0.930789		1643.14	129.139	1806.22	80.8878	1999.98	62.1277
11MB6_7	378.712	953.409	0.86823	18.6204	7.46905	0.126329	8.48916	0.0170604	4.03475	0.475282		109.051	4.36292	120.793	9.66817	358.658	168.779
11MB6_8	526.493	993.208	1.94794	17.9488	13.2994	0.126085	14.2369	0.0164133	5.08092	0.356883		104.948	5.28916	120.574	16.1873	440.971	297.035
11MB6_9	480.73	1171.96	1.28371	17.6325	9.86512	0.130021	10.3684	0.0166275	3.19106	0.307768		106.306	3.36448	124.117	12.1141	480.389	218.449
11MB6_10	214.357	1428.8	1.18878	18.374	16.4193	0.196934	16.8331	0.0262437	3.70916	0.22035		166.996	6.11461	182.529	28.1291	388.64	370.843
11MB6_11	2278.72	10547.3	2.73716	19.6135	5.29229	0.16407	6.38956	0.0233391	3.58025	0.560327		148.725	5.26375	154.26	9.14457	240.165	122.067
11MB6_12	245.048	3245.25	2.18921	19.8934	9.85387	0.277889	10.1969	0.0400939	2.6225	0.257187		253.415	6.51689	248.982	22.5189	207.384	228.979
11MB6_13	231.049	25014.4	1.9345	19.1657	7.64188	0.41731	7.68129	0.0580074	0.777107	0.101169		363.496	2.74659	354.126	22.9685	293.166	174.722
11MB6_14	660.368	11389.5	1.25712	22.642	14.2864	0.0878464	14.5705	0.0144257	2.86329	0.196512		92.3299	2.62483	85.4953	11.9476	-101.424	352.619
11MB6_15	238.528	4991.72	2.23784	19.5603	18.0706	0.207973	19.337	0.0295041	6.88262	0.355931		187.444	12.7153	191.85	33.8165	246.426	419.084
11MB6_16	170.641	3242.63	1.36393	17.8764	12.9594	0.199838	14.0075	0.0259093	5.31641	0.379541		164.895	8.65533	184.989	23.6932	449.958	288.932
11MB6_17	253.377	35664.5	4.27415	9.43551	0.49978	4.53348	1.36735	0.310239	1.27274	0.930807		1741.88	19.4269	1737.13	11.3752	1731.41	9.17123
11MB6_18	633.663	22437	3.57594	19.84	5.95484	0.1672	6.08362	0.024059	1.24516	0.204673		153.258	1.88579	156.986	8.84901	213.65	138.057
11MB6_19	1149.31	57900.7	1.93277	21.4882	7.43157	0.097977	8.98334	0.0152694	5.04699	0.561817		97.6892	4.8932	94.9073	8.13969	25.5533	178.468
11MB6_20	204.473	10372.6	1.91664	20.6058	10.8884	0.197126	11.2508	0.0294599	2.83245	0.251756		187.167	5.2252	182.692	18.8134	125.17	256.99
11MB6_21	192.997	7777.74	2.12322	30.6081	36.5279	0.104428	36.8181	0.0231821	4.6141	0.125321		147.736	6.73915	100.856	35.3628	-904.251	1089.27
11MB6_22	275.283	8176.93	1.57986	20.4794	25.0493	0.0983524	25.225	0.0146084	2.97172	0.117809		93.4904	2.75822	95.2543	22.9392	139.673	596.322
11MB6_23	707.826	6388.02	0.959759	20.4796	9.32072	0.104791	9.40927	0.0155648	1.28786	0.136872		99.5646	1.27241	101.19	9.06239	139.619	219.25
11MB6_24	312.151	10568.1	1.29133	21.3268	12.9775	0.165689	13.4346	0.0256282	3.47438	0.258615		163.128	5.59659	155.671	19.3918	43.609	311.332
11MB6_25	598.099	3005.77	1.23024	18.118	10.5549	0.116299	10.9285	0.0152822	2.83276	0.25921		97.7699	2.74869	111.711	11.5612	420.064	236.246
11MB6_26	221.644	22865.9	3.24088	18.0695	11.3925	0.239611	11.989	0.0314015	3.73466	0.311506		199.314	7.3298	218.102	23.5349	426.044	254.836
11MB6_27	392.631	17877.3	1.61106	19.0472	9.73493	0.252729	10.2171	0.0349129	3.10181	0.303588		221.223	6.74552	228.791	20.9324	307.282	222.189
11MB6_28	786.018	18502.6	1.30199	20.2223	9.14821	0.105019	9.30355	0.0154028	1.69303	0.181977		98.5357	1.65556	101.399	8.9782	169.215	214.007
11MB6_29	507.804	23686.1	1.58207	19.3762	14.5463	0.113742	15.0961	0.0159841	4.03698	0.267418		102.225	4.09426	109.383	15.6555	268.132	335.175
11MB6_30	792.981	13202.2	0.745061	20.0336	9.66885	0.117425	9.75447	0.0170616	1.28954	0.1322		109.058	1.39453	112.735	10.4086	191.116	225.331
11MB6_31	137.308	9854.65	1.84944	23.205	42.637	0.17557	42.772	0.0295481	3.39555	0.0793871		187.72	6.2822	164.241	64.9506	-162.144	1104.56
11MB6_33	295.143	10988.8	1.39622	20.3494	11.8699	0.20086	12.2156	0.0296444	2.88546	0.23621		188.322	5.35536	185.854	20.7495	154.571	278.776
11MB6_34	154.779	12237	1.94381	19.3639	12.7433	0.281286	13.103	0.0395038	3.04895	0.232691		249.757	7.46933	251.677	29.2161	269.592	293.247
11MB6_35	371.797	13258.3	1.79681	18.9729	19.4632	0.106746	20.1875	0.0146887	5.35918	0.26547		94.0008	5.00112	102.984	19.7729	316.172	446.31
11MB6_36	467.502	2121.2	1.10602	17.9918	11.9893	0.124401	12.4005	0.0162329	3.16683	0.25538		103.804	3.26096	119.054	13.9315	435.646	267.841
11MB6_37	684.38	32426.8	1.1135	19.6743	10.6676	0.100717	10.8754	0.0143714	2.11571	0.194541		91.9849	1.93231	97.4379	10.1045	233.047	246.839
11MB6_38	546.094	12331	1.26159	19.1898	12.2638	0.108486	12.7791	0.0150988	3.59226	0.281105		96.6058	3.44446	104.58	12.6998	290.288	281.1
11MB6_39	835.454	23231.4	1.67098	21.8697	7.67232	0.0907613	8.36105	0.014396	3.32305	0.397445		92.141	3.04012	88.2123	7.06429	-16.8205	185.735
11MB6_40	1114.01	31215.7	2.29014	20.4297	6.25909	0.102328	6.4539	0.0151619	1.57373	0.243841		97.0063	1.51518	98.9228	6.08332	145.339	146.932
11MB6_41	201.667	19467.8	1.76714	20.6324	22.4734	0.187464	22.7307	0.0280522	3.41048	0.150038		178.346	5.9991	174.463	36.4525	122.169	535.269
11MB6_43	644.589	15150	1.41722	19.8242	6.31349	0.167505	6.62672	0.0240836	2.01329	0.303813		153.413	3.05217	157.251	9.65406	215.46	146.304
11MB6_44	303.04	942.383	1.05225	17.4904	17.921	0.129575	18.3721	0.0164369	4.04633	0.220243		105.097	4.21811	123.716	21.4022	498.238	397.653
11MB6_45	184.869	6556.62	2.78553	23.885	19.4196	0.166124	21.1017	0.0287777	8.25599	0.391248		182.893	14.8875	156.049	30.5327	-234.486	493.742
11MB6_46	200.223	3857.19	2.13998	17.7786	25.8015	0.103994	26.7799	0.0134093	7.17269	0.267838		85.8675	6.11818	100.457	25.6197	462.121	580.654
11MB6_47	622.535	24055.1	1.61443	19.8182	9.39109	0.100703	9.62383	0.0144745	2.10369	0.218592		92.6398	1.93492	97.4248	8.94046	216.201	217.834
11MB6_48	243.398	4532.2	2.03665	22.2422	21.9391	0.116513	22.1999	0.0187954	3.39256	0.152819		120.038	4.03469	111.906	23.5272	-57.8173	540.178
11MB6_49	826.145	15409.8	1.79009	19.4986	4.94872	0.103688	5.18239	0.0146632	1.53859	0.296889		93.8389	1.43334	100.175	4.94362	253.688	113.846
11MB6_50	142.494	7149.29	3.6565	17.7503	21.0019	0.176932	21.1672	0.0227777	2.63996	0.124719		145.187	3.79004	165.417	32.3217	465.673	469.912
11MB6_51	436.897	30107	2.28098	20.0468	4.82065	0.234106	5.11184	0.0340373	1.70065	0.332689		215.767	3.60871	213.583	9.84647	189.539	112.226
11MB6_52	354.637	1562.7	0.675847	22.1392	18.8883	0.115839	19.0448	0.0186001	2.43713	0.127968		118.802	2.86885	111.292	20.0778	-46.5224	462.807
11MB6_53	474.913	2127.83	1.39877	20.8998	16.3941	0.100085	16.8478	0.0151708	3.88375	0.230519		97.063	3.74144	96.8548	15.565	91.721	390.642
11MB6_54	556.657	1109.69	1.01652	17.7318	13.6164	0.183383	14.1343	0.0235836	3.79083	0.268202		150.265	5.63041	170.967	22.2437	467.988	302.759
11MB6_55	544.997	1022.85	1.33936	16.5497	18.875	0.12446	19.4223	0.0149388	4.5783	0.235723		95.5896	4.34409	119.107	21.8315	618.779	410.724
11MB6_56	208.73	8775.03	1.58201	23.8719	30.5688	0.0780159	31.0625	0.0135073	5.51594	0.177576		86.491	4.73893	76.2778	22.8295	-233.111	786.412
11MB6_57	257.84	22578.6	2.07375	19.124	4.37735	0.390831	4.61869	0.0542085	1.47347	0.319024		340.308	4.88429	334.977	13.1792	298.148	99.9064
11MB6_58	206.829	7470.85	1.51441	20.8759	31.4399	0.0924743	31.9402	0.0140012	5.63081	0.176292		89.6313	5.01204	89.8056	27.4589	94.4289	760.994
11MB6_59	740.929	39422.6	3.05157	20.0514	4.71	0.195376	5.32908	0.0284128	2.49299	0.467808		180.607	4.44001	181.206	8.84422	189.005	109.672
11MB6_60	476.196	13887.2	1.79365	20.1998	9.20188	0.161112	9.40453	0.0236033	1.9418	0.206475		150.389	2.88645	151.676	13.2509	171.82	215.164
11MB6_61	214.329	1484.19	1.5643	16.9801	19.793	0.192197	21.0237	0.0236693	7.08731	0.337111		150.804	10.5639	178.502	34.4273	563.106	435.072
11MB6_62	361.102	16139.6	1.47181	21.4694	6.45896	0.169826	7.20512	0.0264438	3.19306	0.443165		168.253	5.3029	159.268	10.6211	27.6636	154.988
11MB6_63	301.652	5495.94	1.60243	23.2688	40.704	0.0821786	41.1096	0.0138686	5.76028	0.14012		88.7883	5.0794	80.1911	31.7084	-168.98	1051.7
11MB6_64	104.376	71492.3	0.904772	8.17321	1.11063	5.38582	1.79762	0.319259	1.41348	0.786307		1786.11	22.0507	1882.6	15.3955	1990.78	19.7511
11MB6_65	433.319	8411.9	1.26153	24.7507	22.3978	0.0728025	22.6403	0.0130687	3.30513	0.145984		83.7007	2.74854	71.3554	15.6017	-325.124	581.321
11MB62_66	242.02	19665.5	1.85572	20.3687	12.8454	0.190243	13.1017	0.0281042	2.57835	0.196796		178.672	4.54355	176.837	21.2663	152.342	301.973
11MB62_67	140.898	9314.34	2.29991	19.0416	26.1403	0.162638	26.6006	0.0224608	4.92759	0.185243		143.19	6.97802	153.01	37.8008	307.942	604.519
11MB62_68	410.917	1667.45	0.835553	22.1666	12.4354	0.0920848	15.7671	0.0148042	9.6934	0.614786		94.7347	9.11588	89.4436	13.5002	-49.5305	303.577
11MB62_69	60.1749	1690.34	0.904444	34.8558	153.212	0.081495	153.497	0.0206018	9.34792	0.0608999		131.458	12.1642	79.5495	117.973	-1298.28	0
11MB62_70	478.598	190355	2.80119	7.76255	0.228633	6.23189	0.866491	0.350851	0.835784	0.964561		1938.66	13.9935	2008.94	7.58176	2081.97	4.02397
11MB62_71	744.685	23560.4	2.10859	19.927	4.31237	0.178505	4.47917	0.0257984	1.21094	0.27035		164.198	1.96324	166.774	6.88896	203.467	100.133
11MB62_72	124.755	3887.77	1.84551	17.1103	11.7242	0.241748	12.1483	0.0299998	3.18186	0.261919		190.547	5.97421	219.851	24.019	546.442	256.957
11MB62_73	653.232	11491	1.27647	18.8232	6.36731	0.221352	7.68904	0.0302187	4.3103	0.560577		191.917	8.15028	203.035	14.1505	334.159	144.439
11MB62_74	271.401	10449.3	1.72172	19.2821	9.41888	0.198599	10.7356	0.0277735	5.15151	0.479853		176.598	8.97399	183.94	18.0636	279.329	216.04
11MB62_75	247.847	967.654	1.83771	23.8447	24.1886	0.0788932	25.0282	0.0136437	6.42823	0.256839		87.3581	5.5777	77.1039	18.5853	-230.235	617.184
11MB62_76	153.423	4121.8	1.9898	21.4253	23.1996	0.145813	23.3707	0.022658	2.82247	0.12077		144.433	4.03124	138.208	30.2073	32.5598	562.253
11MB62_77	188.385	5932.85	2.17883	23.8975	42.2213	0.0996989	42.3438	0.0172799	3.21782	0.0759927		110.442	3.52356	96.4983	38.9986	-235.814	1108.42
11MB62_78	123.76	3895.56	1.44215	23.1616	29.2378	0.143449	29.7514	0.0240971	5.50429	0.18501		153.498	8.34916	136.111	37.9156	-157.497	739.886
11MB62_79	169.889	3184.4	1.30355	19.9436	16.4809	0.223004	16.697	0.0322564	2.67737	0.160351		204.655	5.3933	204.407	30.9234	201.571	384.863
11MB62_80	114.167	1125.23	1.37142	21.7716	44.2699	0.104892	44.9407	0.0165626	7.73567	0.172131		105.895	8.12478	101.282	43.3465	-5.95748	1117.7
11MB62_81	422.098	2961.78	1.9019	19.524	10.265	0.189181	11.106	0.0267883	4.23949	0.38173		170.416	7.13011	175.93	17.9416	250.67	236.739
11MB62_83	504.459	11194.7	1.25439	22.1744	13.2009	0.0918442	13.7118	0.0147708	3.70805	0.270428		94.522	3.47935	89.2199	11.7121	-50.3883	322.45
11MB62_84	880.375	22460	1.00704	20.5199	2.24042	0.1976	2.34566	0.0294076	0.694731	0.296176		186.84	1.2794	183.093	3.92982	135.014	52.6596
11MB62_85	661.145	35196.1	0.712949	19.5633	6.0851	0.176373	6.3307	0.0250249	1.74623	0.275835		159.336	2.74825	164.935	9.63789	246.089	140.242
11MB62_86	125.85	4554.5	1.5952	5.30958	0.977621	9.29304	4.06269	0.357863	3.94331	0.970616		1972.04	66.997	2367.33	37.2608	2727.7	16.0991
11MB62_87	213.217	10513.6	1.52521	20.6232	16.373	0.174769	17.0281	0.0261407	4.67756	0.274697		166.349	7.68154	163.549	25.7276	123.18	387.865
11MB62_88	259.95	43506	1.74401	17.8385	4.6181	0.443872	5.25234	0.0574267	2.50204	0.476367		359.957	8.75945	372.979	16.3964	454.695	102.534
11MB62_89	371.55	11824.9	1.76142	22.2436	17.7537	0.0893651	18.0801	0.0144169	3.41994	0.189155		92.2736	3.13322	86.9117	15.0611	-57.9729	435.571
11MB62_91	143.414	6409.5	3.43121	24.1028	25.7151	0.186062	25.9239	0.0325255	3.28298	0.126639		206.335	6.66669	173.264	41.3161	-257.446	660.749
11MB62_93	198.639	20903.5	1.97562	17.4763	12.0453	0.240397	12.9028	0.0304703	4.62518	0.358463		193.491	8.81635	218.746	25.3965	500.059	266.103
11MB62_94	173.195	3124.4	3.09153	15.614	33.3731	0.127794	33.8072	0.0144718	5.40061	0.159747		92.6227	4.96643	122.113	38.9164	743.098	724.985
11MB62_95	74.0097	2211.05	1.84216	24.1791	76.4417	0.118485	76.6668	0.0207779	5.87016	0.0765673		132.57	7.70262	113.697	82.6469	-265.461	2302.23
11MB62_96	113.665	1981.03	3.34517	24.8008	38.4796	0.132388	38.8106	0.023813	5.05859	0.13034		151.709	7.58477	126.242	46.1035	-330.321	1021.68
11MB62_97	264.389	969.98	0.517	17.2495	31.6547	0.151244	32.4473	0.0189214	7.12769	0.21967		120.836	8.53259	143.009	43.3093	528.745	710.13
11MB62_98	329.024	1736.15	0.872793	18.1601	8.63491	0.123007	9.69153	0.0162012	4.40045	0.454051		103.603	4.52255	117.795	10.7792	414.87	193.273
11MB62_99	201.173	4565.65	1.70325	19.6186	40.3455	0.120583	40.6502	0.0171575	4.96779	0.122208		109.666	5.4019	115.601	44.444	239.578	966.235
11MB62_100	263.363	15765.4	1.65837	17.9854	16.1199	0.206875	16.4277	0.0269853	3.16501	0.192663		171.653	5.36113	190.927	28.6001	436.429	361.007
11MB62_101	530.802	10280.2	1.64347	20.6009	9.34705	0.1033	10.4616	0.0154343	4.69873	0.44914		98.7358	4.60398	99.8181	9.94603	125.719	220.448
11MB62_102	475.361	9037.19	1.88761	22.001	10.3208	0.0922598	10.4003	0.0147216	1.28383	0.123442		94.2096	1.2007	89.6063	8.92017	-31.3182	250.82
11MB62_103	109.726	95605.6	0.674787	8.58577	1.41521	5.55068	2.0625	0.34564	1.50036	0.727448		1913.75	24.8434	1908.48	17.7471	1902.75	25.4289
11MB62_104	418.792	17448.3	8.9958	18.4823	4.90911	0.282067	5.77998	0.0378101	3.05103	0.527863		239.245	7.16565	252.296	12.9128	375.434	110.539
11MB62_105	377.743	29310.2	4.54734	20.6217	6.53009	0.210499	7.03692	0.0314827	2.62223	0.372638		199.821	5.15939	193.971	12.4256	123.352	153.938
Sample 11MB4A
11MB4_2	815.068	22601.6	2.1815	20.372	5.16811	0.118797	5.31339	0.0175524	1.23401	0.232245		112.169	1.3722	113.981	5.72875	151.974	121.137
11MB4_3	140.339	6684.67	1.361	18.4222	17.8888	0.116139	18.0533	0.0155173	2.4321	0.134718		99.263	2.39569	111.566	19.0765	382.765	404.883
11MB4_4	449.087	15627.4	2.15426	21.7199	5.89642	0.109715	6.13349	0.017283	1.68876	0.275334		110.462	1.84954	105.704	6.15738	-0.222655	142.216
11MB4_5	278.522	9998.18	2.62058	19.5544	15.2682	0.124113	15.3744	0.0176019	1.80331	0.117293		112.482	2.01081	118.794	17.2375	247.098	353.312
11MB4_6	420.33	20013.2	2.05722	20.4015	6.7863	0.115844	6.90252	0.017141	1.26132	0.182733		109.562	1.37025	111.298	7.27639	148.618	159.244
11MB4_7	113.748	2098.79	2.09103	20.5463	29.3287	0.111409	29.988	0.0166018	6.25332	0.208528		106.143	6.58313	107.254	30.532	131.986	702.911
11MB4_8	183.694	17493.9	2.88888	22.4945	20.9307	0.105659	21.1511	0.0172378	3.04536	0.143981		110.175	3.32672	101.987	20.5262	-85.3796	517.588
11MB4_9	492.359	15691.7	2.45221	20.5694	6.62105	0.103876	6.8754	0.0154966	1.85281	0.269483		99.1316	1.82267	100.348	6.56947	129.368	155.902
11MB4_10	298.735	3333.54	1.54983	16.8444	15.6995	0.126889	16.0486	0.0155017	3.32915	0.207442		99.1636	3.27604	121.298	18.3509	580.594	342.95
11MB4_11	77.8739	3899.37	3.01376	23.3447	40.6644	0.101406	41.0645	0.0171692	5.71839	0.139254		109.74	6.22226	98.0729	38.4077	-177.098	1052.25
11MB4_12	151.697	5633.5	1.67302	18.5703	12.1394	0.12147	12.265	0.0163601	1.75099	0.142763		104.611	1.81694	116.404	13.4898	364.736	274.586
11MB4_13	663.744	19723.9	2.10791	19.7233	3.38034	0.243745	3.65699	0.034867	1.39531	0.381546		220.937	3.03053	221.482	7.27722	227.254	78.1182
11MB4_14	138.734	6418.69	1.23517	21.8451	16.8509	0.102766	17.3897	0.0162818	4.29541	0.247008		104.114	4.4362	99.3264	16.4561	-14.0969	409.704
11MB4_15	173.756	13879.6	1.53543	20.9119	17.4515	0.112262	17.5856	0.0170264	2.16723	0.123239		108.835	2.33891	108.032	18.0243	90.3354	416.269
11MB4_16	92.4527	2410.82	2.25576	21.3881	32.1811	0.109123	32.4935	0.0169274	4.49519	0.138341		108.208	4.82354	105.163	32.4723	36.7065	788.142
11MB4_17	290.055	14196.4	1.99324	21.118	9.97099	0.0973514	10.664	0.0149105	3.7815	0.354605		95.4098	3.58136	94.3285	9.60635	67.0471	237.813
11MB4_18	99.3749	3432.04	3.32103	25.9327	41.4733	0.0887595	41.8224	0.016694	5.39217	0.12893		106.728	5.70759	86.3471	34.633	-446.44	1133.33
11MB4_19	288.913	63330.2	1.69109	19.519	6.78508	0.125674	7.2298	0.017791	2.49653	0.345311		113.68	2.81318	120.203	8.19594	251.268	156.239
11MB4_20	114.7	16232.5	3.58767	19.0398	9.20329	0.396593	9.3753	0.0547655	1.78764	0.190676		343.713	5.98343	339.174	27.0391	308.159	209.962
11MB4_21	279.408	7341.22	1.58357	21.4749	12.2125	0.11116	12.3606	0.0173132	1.90752	0.154323		110.653	2.09272	107.026	12.5563	27.0025	293.795
11MB4_22	206.266	9851.53	2.38577	21.0112	12.1711	0.173032	12.2677	0.0263679	1.53629	0.125231		167.776	2.54428	162.047	18.3762	79.0952	289.921
11MB4_23	428.867	16855.6	2.49515	20.6691	5.83144	0.105137	6.14829	0.0157607	1.94828	0.316881		100.807	1.94873	101.507	5.93921	117.964	137.567
11MB4_24	569.69	20983.9	2.3711	19.8714	5.43323	0.106884	5.66454	0.0154042	1.6022	0.282847		98.545	1.56688	103.111	5.55404	209.942	126.002
11MB4_25	533.367	12701.3	1.2562	21.2522	6.37152	0.102279	6.52669	0.0157648	1.41467	0.216751		100.834	1.41536	98.8776	6.14925	51.9857	152.21
11MB4_26	372.693	16957.1	2.26363	20.3724	9.25693	0.10512	9.64796	0.015532	2.71891	0.281812		99.356	2.68069	101.492	9.31867	151.947	217.249
11MB4_27	342.019	15922.5	2.51031	22.3619	8.48734	0.103278	8.58073	0.0167501	1.26253	0.147135		107.084	1.3408	99.7981	8.1562	-70.9235	207.673
11MB4_28	223.103	14572.2	1.72088	20.1921	11.941	0.111737	12.115	0.0163635	2.04597	0.168879		104.632	2.12346	107.553	12.3643	172.701	279.522
11MB4_29	121.252	5751.38	2.23355	26.2428	32.4599	0.0898139	32.9033	0.0170944	5.38337	0.163612		109.266	5.83263	87.33	27.5402	-477.84	879.278
11MB4_30	326.597	8986.46	2.347	20.4955	11.2646	0.121714	11.3447	0.0180924	1.34566	0.118616		115.589	1.54157	116.625	12.4997	137.821	265.296
11MB4_31	1190.76	62680	1.23558	20.4513	2.94473	0.117426	3.04729	0.0174174	0.783932	0.257256		111.313	0.865129	112.736	3.25155	142.869	69.1075
11MB4_33	185.818	5247.77	2.9936	22.9363	20.627	0.107462	21.7204	0.0178763	6.80456	0.31328		114.22	7.70373	103.641	21.4036	-133.263	514.668
11MB4_34	184.568	12482.7	2.44508	26.0281	28.3756	0.0835728	28.9522	0.0157763	5.74977	0.198595		100.907	5.75673	81.4984	22.6773	-456.115	761.142
11MB4_35	96.0795	4354.64	1.83605	17.2623	25.7505	0.12436	26.4995	0.0155696	6.2561	0.236083		99.5945	6.18284	119.017	29.7692	527.13	573.125
11MB4_36	343.425	6305.99	2.05393	20.6157	6.24812	0.116204	6.53334	0.0173747	1.90932	0.292243		111.042	2.102	111.625	6.90635	124.037	147.239
11MB4_37	442.363	21290.9	1.95721	21.0534	10.6559	0.101398	11.0924	0.0154829	3.08127	0.277782		99.0443	3.0285	98.0663	10.3695	74.3437	253.865
11MB4_38	233.224	8879.75	2.7817	22.1753	24.8163	0.0944408	24.9687	0.015189	2.75431	0.110311		97.1783	2.65652	91.6318	21.8807	-50.4893	611.969
11MB4_39	399.965	16382.7	1.73474	21.4395	7.2736	0.113998	7.35645	0.0177261	1.10094	0.149656		113.269	1.23612	109.616	7.644	30.9786	174.472
11MB4_40	991.307	60973.6	2.16279	20.5152	3.01871	0.114437	3.31217	0.0170271	1.36303	0.411523		108.84	1.47107	110.016	3.45346	135.571	70.9387
11MB4_41	367.661	9618.57	1.92015	21.1568	9.35762	0.109911	9.46532	0.016865	1.42381	0.150424		107.812	1.52228	105.884	9.51764	62.7077	223.316
11MB4_42	228.966	6032.94	2.60193	19.2888	13.973	0.126236	14.2514	0.0176599	2.80303	0.196685		112.85	3.13568	120.71	16.221	278.536	321.249
11MB4_43	1175.05	37413.5	1.33288	20.8673	1.33619	0.109806	1.75565	0.0166185	1.13881	0.648658		106.249	1.20007	105.788	1.76379	95.4335	31.6402
11MB4_44	215.753	7500.55	1.2481	23.2825	17.948	0.095218	18.2683	0.0160786	3.40597	0.186441		102.825	3.47439	92.3526	16.1281	-170.445	450.103
11MB4_46	565.489	17639.8	2.3985	21.9658	5.00438	0.0933797	5.46115	0.0148764	2.18642	0.400358		95.1933	2.06603	90.6468	4.73586	-27.4355	121.3
11MB4_47	222.319	8170.73	2.17317	24.3059	12.5312	0.0940619	12.8626	0.0165815	2.9012	0.225553		106.015	3.05055	91.2802	11.2292	-278.753	319.941
11MB4_48	207.686	6370	2.25168	20.7599	14.4743	0.1032	14.6646	0.0155383	2.35467	0.160568		99.3959	2.3225	99.7257	13.93	107.638	343.431
11MB4_49	263.391	9025.2	2.4729	20.9432	19.5737	0.103459	20.0959	0.0157148	4.55159	0.226493		100.516	4.53961	99.9641	19.1338	86.8392	467.988
11MB4_50	363.248	26686.3	4.45823	21.1349	7.53151	0.0999969	7.61334	0.015328	1.11326	0.146225		98.061	1.08341	96.7735	7.0276	65.1817	179.537
11MB4_51	576.431	24846.4	1.30228	19.9851	4.16629	0.11308	4.28809	0.0163905	1.01475	0.236644		104.803	1.05489	108.779	4.42341	196.753	96.8294
11MB4_52	429.072	12948.6	1.53083	21.3119	7.06221	0.100483	7.41552	0.0155315	2.26166	0.30499		99.3531	2.2298	97.2223	6.87524	45.2434	168.934
11MB4_53	297.884	8720.12	2.84464	20.3925	7.62247	0.119486	7.70586	0.017672	1.13061	0.146721		112.926	1.26564	114.606	8.35139	149.651	178.868
11MB4_54	631.412	55025.2	1.81042	20.9782	2.74939	0.111689	3.12491	0.0169933	1.48524	0.475292		108.625	1.59983	107.509	3.18784	82.8283	65.2784
11MB4_55	183.139	6542.57	2.49822	20.9833	11.362	0.0999013	12.0532	0.0152035	4.02299	0.333771		97.2705	3.88381	96.6852	11.1164	82.2486	270.376
11MB4_56	175.842	7462.35	2.65565	23.399	23.9502	0.102365	24.342	0.0173719	4.35018	0.17871		111.025	4.78843	98.9573	22.9556	-182.89	605.314
11MB4_57	827.903	19988.3	2.64949	20.9612	3.92138	0.114332	4.18092	0.0173813	1.45012	0.346843		111.084	1.59706	109.92	4.35569	84.7522	93.0314
11MB4_58	194.189	5810.38	2.22289	22.52	11.4995	0.097267	12.8844	0.0158866	5.81115	0.451022		101.607	5.85824	94.2504	11.5976	-88.1557	282.676
11MB4_59	98.1694	4287.33	1.46822	42.8281	35.6217	0.0552669	35.8104	0.017167	3.67096	0.102511		109.726	3.99392	54.6213	19.0455	NA	NA
11MB4_62	452.571	24178.9	2.36803	20.0647	10.5464	0.103968	11.1023	0.0151297	3.46919	0.312475		96.8019	3.33315	100.432	10.617	187.46	246.04
11MB4_63	225.829	12836.7	1.73635	18.5181	12.5201	0.119441	12.7952	0.0160417	2.63888	0.206241		102.591	2.68583	114.566	13.863	371.074	282.947
11MB4_64	308.305	20034.9	1.95841	20.6496	6.3523	0.116034	6.54531	0.0173778	1.57779	0.241057		111.062	1.73733	111.47	6.90994	120.204	149.806
11MB4_65	288.275	9299.94	1.87878	21.7557	5.85635	0.107794	6.12947	0.0170085	1.80929	0.29518		108.722	1.9506	103.945	6.05608	-4.20108	141.364
11MB4_66	276.628	9523.37	2.40505	23.322	10.5818	0.0896689	10.9133	0.0151672	2.66957	0.244616		97.0401	2.57116	87.1948	9.11898	-174.668	264.404
11MB4_67	289.95	16316.6	2.5825	21.069	8.22136	0.112692	8.44192	0.0172202	1.91709	0.227092		110.063	2.09211	108.425	8.68163	72.5774	195.732
11MB4_68	714.75	335066	4.67022	13.7102	0.228291	1.57739	1.54153	0.156849	1.52453	0.988973		939.242	13.3248	961.34	9.57974	1012.22	4.62788
11MB4_69	724.384	26702.3	1.05533	21.2365	2.49626	0.109731	2.72732	0.016901	1.09863	0.402822		108.04	1.17707	105.72	2.73829	53.7277	59.5689
11MB4_70	108.051	4979.12	2.24542	23.8565	29.8079	0.0884749	30.6367	0.0153082	7.07808	0.231032		97.9355	6.87956	86.0817	25.2909	-231.476	765.83
11MB4_71	959.142	34651.3	2.27795	20.5313	4.09064	0.115192	4.32836	0.0171529	1.41472	0.326848		109.637	1.53794	110.703	4.53971	133.714	96.1954
11MB4_72	100.482	5135.76	2.43962	23.0203	20.0488	0.0907321	21.043	0.0151485	6.39148	0.303735		96.9215	6.14839	88.1851	17.7756	-142.31	500.869
11MB4_73	194.745	10960.6	1.57334	20.3844	17.2932	0.113547	17.3999	0.016787	1.92478	0.11062		107.318	2.04853	109.205	18.0174	150.537	407.879
11MB4_74	108.034	7332.05	2.11627	20.906	26.9296	0.107185	27.5393	0.0162518	5.76316	0.20927		103.924	5.94129	103.387	27.0769	91.0368	648.278
11MB4_75	161.197	6307.22	1.96787	24.7207	36.3055	0.0865749	36.5661	0.0155221	4.35705	0.119156		99.2933	4.29311	84.3077	29.5912	-322.002	958.765
11MB4_76	97.3414	2712.1	2.78232	24.1118	22.6523	0.0905487	23.0192	0.0158347	4.0932	0.177817		101.278	4.1131	88.0144	19.4093	-258.394	580.327
11MB4_77	180.125	10419.1	3.04021	19.2663	21.2087	0.111295	21.9275	0.0155515	5.56829	0.253941		99.4802	5.49682	107.149	22.3016	281.207	490.161
11MB4_78	342.411	7667.25	3.1372	22.3628	12.5647	0.0913638	12.7384	0.0148184	2.09646	0.164578		94.8244	1.9734	88.7731	10.8284	-71.021	308.016
11MB4_79	171.187	4521.38	3.16847	24.6018	17.3948	0.085156	18.0313	0.0151943	4.74879	0.263363		97.2123	4.58178	82.9809	14.3684	-309.649	448.21
11MB4_80	477.817	25394.7	1.87884	20.3889	5.67113	0.116658	5.82165	0.0172508	1.31528	0.225929		110.258	1.43786	112.038	6.17557	150.028	132.992
11MB4_81	227.081	8364.15	2.10346	20.8507	17.5383	0.10415	18.0904	0.0157499	4.43526	0.245171		100.739	4.43331	100.6	17.3281	97.2762	417.807
11MB4_82	196.25	7370.91	2.29032	23.5606	25.3808	0.0913156	25.5997	0.0156038	3.34048	0.130489		99.8117	3.30851	88.7281	21.7533	-200.109	644.615
11MB4_83	108.557	4652.84	1.98936	28.5049	37.1562	0.0842531	37.4277	0.0174182	4.49998	0.120231		111.318	4.9663	82.1357	29.5393	-702.138	1062.08
11MB4_84	204.955	7016.51	2.21231	24.8472	20.8978	0.0888486	21.006	0.0160113	2.12941	0.101371		102.398	2.16324	86.4302	17.406	-335.131	542.759
11MB4_85	521.937	16114	1.94606	21.2083	3.05267	0.112778	3.19047	0.0173472	0.927521	0.290716		110.868	1.01953	108.503	3.28323	56.8794	72.7966
11MB4_86	305.772	76960.3	2.55343	13.7292	0.792504	1.57866	4.27468	0.157192	4.20058	0.982664		941.153	36.7838	961.84	26.5783	1009.42	16.0668
11MB4_87	241.409	15084	3.0792	18.1316	9.54501	0.130928	9.98682	0.0172173	2.93754	0.294142		110.045	3.2052	124.931	11.7401	418.383	213.618
11MB4_88	253.862	8636.45	2.65622	20.5408	9.65812	0.103338	10.1882	0.0153948	3.2436	0.318367		98.4854	3.1702	99.8529	9.68933	132.601	227.513
11MB4_89	235.266	9890.39	2.33372	21.6481	10.8651	0.0961478	11.149	0.0150958	2.50003	0.224237		96.5868	2.3967	93.2142	9.93003	7.72739	262.162
11MB4_90	339.456	10269.3	1.38819	19.4192	7.87631	0.112425	8.06323	0.0158341	1.7261	0.21407		101.273	1.73442	108.181	8.27448	263.076	181.047
11MB4_91	150.979	5989.36	1.83943	21.7639	12.8266	0.102492	13.4611	0.0161779	4.08414	0.303403		103.455	4.19153	99.0737	12.7071	-5.10218	310.529
11MB4_92	566.604	41977.9	2.85952	20.1697	3.76599	0.181542	3.95058	0.0265567	1.19349	0.302104		168.962	1.99034	169.386	6.16344	175.296	87.8782
11MB4_93	248.566	13608.7	6.41567	19.759	7.63344	0.180139	8.12535	0.025815	2.78423	0.342659		164.302	4.51675	168.18	12.5941	223.117	176.746
11MB4_94	970.384	508540	2.4294	9.38771	0.407956	4.36576	2.82258	0.297247	2.79294	0.9895		1677.64	41.2554	1705.88	23.3228	1740.72	7.47571
11MB4_95	179.806	14003.2	2.27574	21.4331	13.5263	0.164965	13.6526	0.0256435	1.85262	0.135697		163.225	2.98597	155.04	19.6327	31.7168	325.328
11MB4_96	449.138	22825.5	4.44911	20.0516	3.79999	0.218909	4.89504	0.0318356	3.08569	0.630371		202.026	6.13724	201.002	8.92669	188.975	88.4733
11MB4_97	162.998	5696.52	2.35276	25.3922	36.3797	0.0838427	36.5686	0.0154406	3.71195	0.101506		98.7759	3.63856	81.7513	28.7312	-391.295	974.212
11MB4_98	164.034	4769.8	2.17345	22.3392	20.9577	0.0969981	21.2707	0.0157155	3.63571	0.170926		100.521	3.62631	94.0016	19.0994	-68.4381	516.588
11MB4_99	125.039	13610.1	1.33494	18.8732	9.69079	0.262497	9.99876	0.035931	2.46249	0.246279		227.562	5.50593	236.678	21.1122	328.147	220.341
11MB4_100	195.162	10050.2	2.13493	22.1626	7.78213	0.101434	8.07707	0.0163043	2.16278	0.267768		104.257	2.23671	98.0993	7.55296	-49.0864	189.566
11MB4_101	234.609	5785.08	3.11681	20.9069	12.7087	0.0979777	12.8591	0.0148565	1.96081	0.152484		95.0666	1.8504	94.9079	11.6518	90.9193	302.15
11MB4_102	206.923	8771.07	1.64177	21.8152	18.3273	0.0959909	18.5389	0.0151876	2.79319	0.150667		97.1693	2.69377	93.0689	16.4883	-10.7891	445.841
11MB4_103	815.989	19751.2	2.40011	21.0391	2.69044	0.110326	2.85208	0.0168346	0.946506	0.331866		107.619	1.01017	106.264	2.87753	75.9482	63.961
11MB4_104	162.267	99137.4	0.784076	11.2138	0.669179	2.99054	3.99357	0.24322	3.9371	0.985861		1403.42	49.6541	1405.22	30.3975	1407.93	12.8107
11MB4_105	651.576	22683.8	1.76461	20.8424	5.25983	0.106655	5.37838	0.0161224	1.12302	0.208802		103.103	1.14865	102.901	5.26326	98.2344	124.514
Sample 11MB3
11MB3_1	181.295	4052.94	2.08533	19.8037	29.2771	0.12368	29.8254	0.0177642	5.69265	0.190866		113.51	6.40519	118.403	33.3449	217.845	690.786
11MB3_3	818.839	49146.7	2.44596	23.2918	10.5505	0.0820229	10.7536	0.013856	2.07976	0.193402		88.7083	1.83228	80.045	8.27733	-171.444	263.465
11MB3_4	201.471	7016.69	1.59345	19.5551	27.5736	0.131388	27.9331	0.0186344	4.46692	0.159915		119.019	5.26772	125.344	32.9492	247.049	645.748
11MB3_6	187.159	9556.05	1.31501	24.0551	32.7736	0.146817	33.017	0.0256143	4.00205	0.121212		163.041	6.44315	139.098	42.9447	-252.421	849.002
11MB3_8	458.144	14803.6	1.48326	19.6565	21.1494	0.0990514	21.796	0.014121	5.26953	0.241766		90.3932	4.73006	95.9003	19.9483	235.133	492.817
11MB3_10	229.928	5847.38	2.0594	22.8497	31.0311	0.0844181	31.4249	0.0139899	4.95962	0.157824		89.5598	4.41111	82.2902	24.8445	-123.919	782.078
11MB3_11	619.173	42876.9	3.753	20.9064	7.40572	0.091662	7.97227	0.0138985	2.95167	0.370242		88.9783	2.6083	89.0504	6.79703	90.9607	175.658
11MB3_13	139.648	4991.27	1.53632	21.1854	41.4772	0.089035	42.2053	0.0136803	7.80592	0.184951		87.591	6.79104	86.604	35.05	59.5022	1028.42
11MB3_14	484.131	18715.4	0.579208	19.7085	9.3296	0.18956	9.65274	0.0270956	2.47666	0.256576		172.345	4.21185	176.254	15.6198	228.996	215.898
11MB3_15	148.065	7286.8	0.865535	25.44	60.828	0.11104	61.0527	0.0204877	5.23344	0.0857201		130.738	6.77316	106.916	62.033	-396.191	1735.04
11MB3_16	143.068	7620.12	1.39643	21.3427	32.5437	0.156749	33.1721	0.0242635	6.42593	0.193715		154.545	9.81288	147.853	45.6731	41.8186	796.696
11MB3_20	120.674	6786.72	1.89015	23.8303	55.5422	0.134043	55.8199	0.0231671	5.56126	0.0996286		147.641	8.1174	127.724	67.0912	-228.705	1506.87
11MB3_21	183.369	6531.66	1.28292	18.0518	66.1385	0.103484	66.5488	0.0135486	7.37844	0.110873		86.7532	6.35816	99.9875	63.4516	428.228	1669.33
11MB3_23	602.179	50079.6	1.97637	13.7301	0.899884	1.70243	9.6817	0.169528	9.63979	0.995671		1009.51	90.0834	1009.44	62.0062	1009.28	18.2305
11MB3_24	230.007	27529.8	1.2526	22.3388	27.6109	0.14574	27.9882	0.0236123	4.58023	0.163649		150.445	6.81095	138.144	36.1644	-68.3949	685.444
11MB3_25	77.0227	148039	0.748899	7.7651	1.21004	6.55634	2.54281	0.369239	2.23644	0.879517		2025.82	38.8785	2053.5	22.406	2081.39	21.2967
11MB3_26	104.16	3659.9	2.47966	37.5625	80.527	0.0826271	80.9037	0.02251	7.79855	0.096393		143.5	11.0673	80.6118	62.7762	NA	NA
11MB3_28	486.916	18096.7	2.00799	22.5494	12.3606	0.141579	12.6291	0.0231544	2.59029	0.205106		147.561	3.77884	134.45	15.9049	-91.3554	304.155
11MB3_29	272.411	227730	1.80546	11.5268	1.3102	2.67372	2.29989	0.223523	1.89021	0.821867		1300.46	22.2607	1321.22	16.9976	1355.03	25.2673
11MB3_30	193.419	6378.5	2.24544	21.1085	22.308	0.177012	22.5657	0.0270994	3.40062	0.150699		172.369	5.78393	165.486	34.4721	68.1202	536.582
11MB3_34	100.404	35815.1	1.29942	12.499	2.80771	2.23062	3.42365	0.202209	1.95911	0.572229		1187.18	21.2422	1190.71	24.0071	1197.16	55.3771
11MB3_35	39.5153	12764.3	1.40428	13.1126	7.629	1.9981	8.61124	0.190022	3.99397	0.463809		1121.49	41.1128	1114.87	58.337	1102	152.795
11MB3_36	217.639	157682	1.42035	6.31846	3.23338	9.45994	7.63782	0.433509	6.91965	0.905972		2321.52	134.916	2383.67	70.2507	2437.21	54.7869
11MB3_37	69.9023	40105.6	8.89829	13.4156	6.76308	1.66464	6.93467	0.161967	1.53308	0.221075		967.701	13.7759	995.144	44.0158	1056.15	136.315
11MB3_38	86.0583	41039.3	2.18566	10.83	3.81038	3.44076	4.26592	0.270259	1.91809	0.449631		1542.12	26.3074	1513.76	33.5736	1474.29	72.3181
11MB3_39	182.021	8590.03	1.51888	18.7164	19.6324	0.163894	20.5098	0.0222476	5.93462	0.289355		141.845	8.32604	154.106	29.3334	347.089	447.828
11MB3_40	203.921	598.375	1.38157	21.5401	21.5346	0.158725	21.9624	0.0247966	4.31371	0.196413		157.9	6.7286	149.587	30.5567	19.7682	522.301
11MB3_41	173.82	21303.3	0.522041	8.84402	1.25099	4.62651	4.86674	0.296758	4.70321	0.966398		1675.21	69.3861	1754.06	40.655	1849.33	22.6243
11MB3_42	1019.47	23122.1	2.80576	20.1788	4.78818	0.102839	9.02511	0.0150505	7.65022	0.84766		96.2989	7.31233	99.3935	8.54551	174.245	111.789
11MB3_44	52.4767	14164.6	3.10878	9.88594	3.10859	3.63936	4.73348	0.260941	3.56967	0.754131		1494.65	47.6213	1558.18	37.7205	1645.38	57.6785
11MB3_46	291.599	3364.15	1.24271	20.9058	24.6464	0.107312	25.4523	0.0162709	6.35434	0.249657		104.045	6.55831	103.503	25.0509	91.0499	591.737
11MB3_48	385.025	3064.44	0.963544	18.683	16.4924	0.125789	17.3191	0.0170447	5.28686	0.305262		108.951	5.71171	120.307	19.6515	351.072	374.956
11MB3_49	396.227	9326.22	1.57148	20.8713	13.9056	0.101065	15.5359	0.0152986	6.92802	0.445937		97.8741	6.72952	97.7594	14.4805	94.9809	330.586
11MB3_51	116.856	3314.98	2.53048	24.6999	45.1703	0.0950923	45.4795	0.0170349	5.29459	0.116417		108.889	5.71683	92.236	40.1205	-319.851	1213.06
11MB3_52	372.387	12966.5	1.5513	22.8287	10.6159	0.0851631	11.7996	0.0141004	5.15098	0.436538		90.2622	4.61699	82.9875	9.40299	-121.649	262.542
11MB3_53	141.575	3968.97	1.5475	18.2627	87.3242	0.113318	87.7077	0.0150094	8.19336	0.0934167		96.0378	7.81041	108.996	90.8878	402.268	2631.86
11MB3_54	743.819	27746.3	2.78755	22.5179	7.5873	0.0962614	7.93931	0.015721	2.33785	0.294465		100.556	2.3326	93.3194	7.07877	-87.9369	186.207
11MB3_55	114.018	12299	3.22673	19.4591	32.6553	0.164835	33.4212	0.0232633	7.11397	0.212858		148.247	10.4259	154.927	48.0575	258.343	768.752
11MB3_56	161.03	8894.28	1.57762	24.9152	23.2878	0.147135	23.4814	0.0265876	3.00959	0.128169		169.156	5.02468	139.379	30.5906	-342.167	607.01
11MB3_57	121.094	6116.95	6.07128	35.1352	44.2555	0.0961917	44.512	0.024512	4.77203	0.107208		156.109	7.3601	93.2549	39.6807	NA	NA
11MB3_58	150.502	4557.18	3.71016	34.6333	55.8861	0.0864206	56.149	0.0217075	5.42807	0.0966725		138.439	7.43443	84.1635	45.3817	NA	NA
11MB3_60	126.045	3747.94	3.41248	23.4865	41.7123	0.114916	41.8451	0.0195748	3.33119	0.0796077		124.968	4.12284	110.452	43.821	-192.223	1084.75
11MB3_62	123.6	5792.94	1.44316	16.6116	32.9147	0.109266	33.8231	0.0131642	7.78613	0.230201		84.3079	6.52159	105.294	33.8418	610.717	729.903
11MB3_63	102.464	5831.93	2.32471	20.5779	53.1207	0.177353	53.601	0.0264691	7.1594	0.133568		168.412	11.9012	165.781	82.164	128.398	1339.96
11MB3_64	297.851	7054.14	1.32343	21.5044	14.6956	0.0973523	15.4586	0.0151836	4.79662	0.310289		97.1438	4.62468	94.3294	13.926	23.7248	354.232
11MB3_65	157.697	3571.45	2.29873	17.931	27.9698	0.137961	29.0085	0.0179415	7.693	0.265198		114.633	8.74079	131.226	35.7243	443.181	633.255
11MB3_66	531.555	18817.9	1.94781	22.2864	14.07	0.0899526	14.148	0.0145396	1.48394	0.104887		93.0535	1.37094	87.4592	11.8563	-62.6653	344.638
11MB3_67	213.96	5866.79	1.28462	18.8046	39.5764	0.0992892	40.2777	0.0135414	7.48329	0.185793		86.7079	6.44517	96.12	36.9552	336.424	930.458
11MB3_68	782.124	15821.4	2.52319	20.3407	10.1812	0.0980611	10.3258	0.0144665	1.72227	0.166793		92.5887	1.58323	94.985	9.36346	155.588	238.875
11MB3_69	334.729	13475.7	3.56216	19.8516	19.6945	0.101579	20.065	0.014625	3.8379	0.191274		93.5963	3.56618	98.2328	18.7891	212.26	460.218
11MB3_71	1434.68	260818	41.0397	9.17889	0.26517	4.19453	1.20034	0.279237	1.17069	0.975294		1587.52	16.4733	1672.95	9.84204	1781.84	4.83378
11MB3_74	164.884	8307.06	1.47633	21.7834	27.7952	0.182573	27.9447	0.0288444	2.88643	0.103291		183.312	5.21664	170.272	43.8336	-7.27156	682.226
11MB3_76	65.8768	5498.86	2.76577	12.1342	25.2452	0.394417	26.4037	0.0347109	7.73554	0.292972		219.965	16.7285	337.591	75.9744	1255.3	501.693
Sample SLO-107
107-1	194.566	5770.7	1.21279	21.3385	13.4287	0.0908658	13.6851	0.0140625	2.63677	0.192674		90.0212	2.35716	88.3096	11.5752	42.2662	322.317
107-2	239.283	14894.3	1.94399	22.1814	19.5277	0.0885596	19.6549	0.014247	2.23278	0.113599		91.1939	2.02182	86.1606	16.2376	-51.1529	479.152
107-3	186.624	7873.55	1.22358	22.2401	10.9747	0.0939944	11.1571	0.0151613	2.0094	0.180101		97.0025	1.93458	91.2175	9.73379	-57.5849	268.12
107-4	118.448	8441.69	1.06598	21.4359	10.9692	0.167309	11.0846	0.0260112	1.59504	0.143897		165.535	2.60674	157.081	16.1332	31.3627	263.486
107-5	59.8039	2581.54	2.11833	20.5762	29.1516	0.126558	29.4789	0.0188866	4.38077	0.148607		120.616	5.23476	121	33.6385	128.593	698.947
107-6	319.554	8179.77	1.13524	19.8471	6.24523	0.0938584	7.68968	0.0135104	4.48644	0.583437		86.5106	3.85532	91.0913	6.69971	212.781	144.802
107-7	343.197	57407.5	1.75799	16.0107	0.657239	0.839577	4.70888	0.0974922	4.66279	0.990212		599.695	26.7014	618.912	21.8251	689.814	14.0088
107-8	198.682	16577.7	1.58418	20.2419	5.99353	0.20344	7.78408	0.0298667	4.96684	0.638077		189.714	9.2855	188.033	13.3621	166.95	140.138
107-9	122.821	10912.3	1.43979	24.963	17.2696	0.0755424	17.9644	0.0136769	4.94794	0.27543		87.5693	4.30358	73.9454	12.8124	-347.114	448.311
107-10	217.577	8667.3	1.21268	19.6896	9.7507	0.11529	10.3912	0.0164637	3.59167	0.345646		105.267	3.75016	110.793	10.9072	231.208	225.615
107-11	140.908	14410	0.918328	20.4626	6.87957	0.168424	7.10002	0.0249956	1.75551	0.247254		159.151	2.7597	158.05	10.3922	141.572	161.648
107-12	59.5408	11906.9	1.91774	17.7531	15.0741	0.379969	15.2264	0.0489239	2.14789	0.141064		307.911	6.45814	327.015	42.5952	465.349	335.661
107-13	554.606	29762.6	1.46568	20.9333	4.91647	0.0909709	5.29561	0.0138114	1.96769	0.37157		88.425	1.72805	88.4074	4.48371	87.956	116.598
107-14	113.625	8744.54	2.00177	19.2275	13.3971	0.194816	13.8101	0.0271672	3.35203	0.242723		172.795	5.71519	180.73	22.8677	285.789	307.501
107-15	129.195	13441.4	1.24916	20.9277	12.0305	0.147965	12.8946	0.0224585	4.64095	0.359914		143.175	6.57143	140.114	16.8775	88.5908	286.046
107-16	333.986	5041.81	1.44515	22.0974	10.2819	0.0897254	10.5288	0.0143799	2.2668	0.215295		92.0384	2.0715	87.2475	8.80277	-41.925	250.362
107-17	442.741	33652.7	1.70453	20.8859	7.7156	0.0940301	12.0831	0.0142436	9.29897	0.769585		91.1721	8.41841	91.2507	10.5454	93.2825	182.97
107-19	60.2179	5645.99	1.87599	23.8777	47.398	0.144078	47.7594	0.0249511	5.86369	0.122776		158.871	9.20189	136.67	61.1443	-233.723	1258.33
107-20	517.14	26463.2	6.88373	20.6621	3.68079	0.115231	3.9146	0.0172681	1.33262	0.340424		110.367	1.45826	110.74	4.10701	118.742	86.7824
107-21	245.634	13498	2.2554	20.6577	4.60587	0.140506	6.24374	0.021051	4.21547	0.675153		134.295	5.60262	133.494	7.8105	119.287	108.597
107-22	111.872	6191.88	1.57669	20.9115	8.33857	0.153853	9.29747	0.023334	4.11231	0.442304		148.692	6.04471	145.308	12.5884	90.4201	197.888
107-23	410.636	6668.85	1.35674	20.7526	5.27366	0.0940763	5.71331	0.0141596	2.19782	0.384684		90.6384	1.97813	91.2935	4.98832	108.447	124.626
107-24	95.4511	8526.48	1.60347	21.7424	9.38898	0.167671	9.63256	0.0264402	2.15251	0.223462		168.23	3.57433	157.396	14.0455	-2.7269	226.83
107-25	67.9218	3598.31	2.52162	19.1792	26.4137	0.132053	26.9382	0.0183687	5.29009	0.196379		117.338	6.15112	125.941	31.9171	291.568	612.822
107-26	270	16075.8	1.72671	21.2949	7.71202	0.159054	7.90868	0.0245651	1.75271	0.221618		156.443	2.70899	149.875	11.0203	47.1983	184.473
107-27	151.316	5352.61	1.88624	28.2355	31.3147	0.0660958	31.8694	0.0135353	5.91976	0.185751		86.6689	5.09625	64.9878	20.0649	-675.83	882.475
107-28	516.373	16610.9	1.51602	20.3895	5.7905	0.0957634	5.96275	0.0141613	1.42286	0.238624		90.6495	1.28079	92.8581	5.29131	149.969	135.807
107-29	293.2	15370.4	1.92505	20.8684	9.32645	0.0933591	9.51209	0.0141301	1.87006	0.196599		90.4508	1.67968	90.6277	8.24725	95.2679	221.219
107-30	370.126	25497.8	0.912111	20.8086	6.49154	0.0939791	7.60691	0.0141832	3.96546	0.521297		90.7882	3.57494	91.2033	6.63539	102.053	153.622
107-31	263.692	5730.89	1.78491	20.6381	9.62867	0.0927822	9.9196	0.0138878	2.38479	0.240412		88.9105	2.10577	90.0918	8.55196	121.492	227.294
107-32	136.304	5680.08	1.9548	21.4324	22.1855	0.105435	22.4216	0.0163891	3.24541	0.144745		104.795	3.37353	101.781	21.7178	31.7578	537.188
107-33	55.9983	2976.06	2.09829	24.3143	20.5699	0.166196	20.746	0.0293076	2.69716	0.130009		186.213	4.95063	156.112	30.0288	-279.633	528.178
107-34	291.005	17663.7	3.2019	21.4904	10.7471	0.104475	11.2465	0.0162839	3.31393	0.294664		104.127	3.42298	100.899	10.8024	25.2738	258.442
107-35	346.947	14899.1	0.968173	20.2116	4.57276	0.174429	5.45816	0.0255692	2.98017	0.546002		162.758	4.78973	163.255	8.23147	170.455	106.834
107-36	67.4118	1791.69	2.26653	16.3057	15.7223	0.411445	16.3438	0.0486576	4.46429	0.273149		306.275	13.3533	349.915	48.4127	650.762	339.433
107-37	351.79	34608.3	1.43261	20.845	4.72353	0.0963588	5.28978	0.0145677	2.38117	0.450145		93.2322	2.20404	93.4097	4.72073	97.9685	111.812
107-38	424.634	31554.2	1.33799	19.8132	5.17825	0.102254	5.69851	0.0146938	2.37882	0.417445		94.0331	2.22064	98.855	5.36778	216.762	119.948
107-39	48.9229	32663.5	1.18462	13.225	2.37279	1.8975	4.48504	0.182002	3.80597	0.848593		1077.9	37.7786	1080.21	29.8318	1084.9	47.5972
107-40	114.671	9731.75	1.54113	22.8813	22.9881	0.0819169	23.3288	0.0135942	3.9723	0.170275		87.0435	3.43439	79.9456	17.9369	-127.33	574.22
107-42	199.974	35799.4	1.68329	20.3923	6.68799	0.200893	6.93501	0.029712	1.83444	0.264519		188.745	3.41223	185.882	11.7803	149.663	156.886
107-43	133.175	8197.26	1.84938	20.4301	18.7518	0.171536	18.9249	0.025417	2.55377	0.134943		161.801	4.0806	160.751	28.1432	145.286	443.199
107-44	148.635	3352.68	1.42515	22.8011	19.8128	0.0826284	20.0363	0.0136642	2.98402	0.148931		87.4885	2.59304	80.613	15.5285	-118.66	492.612
107-45	162.29	9742.32	1.78853	20.5879	3.82093	0.198079	4.36818	0.0295767	2.11695	0.484629		187.899	3.92031	183.5	7.33317	127.257	89.9784
107-46	721.385	16439	1.28467	20.8282	3.67816	0.102002	4.31108	0.0154085	2.24869	0.521606		98.5721	2.19972	98.6229	4.05178	99.8695	87.024
107-47	103.309	6234.72	1.77264	28.823	25.0816	0.0778656	25.7352	0.0162773	5.76304	0.223936		104.086	5.95033	76.1362	18.8794	-733.069	710.226
107-48	92.6006	12268.3	2.40288	19.6927	11.7365	0.176265	12.3916	0.0251751	3.97574	0.320842		160.28	6.29374	164.841	18.8568	230.84	271.817
107-49	453.79	23164.3	1.39388	20.7408	6.63138	0.0937369	6.75757	0.0141005	1.29982	0.19235		90.2629	1.16508	90.9785	5.88061	109.774	156.704
107-50	30.9338	1838.57	2.40447	19.4539	86.0642	0.122254	86.3956	0.0172491	7.5605	0.0875103		110.247	8.26436	117.113	95.8473	258.988	2603.22
107-52	179.708	8199.31	1.76717	21.0036	13.0976	0.119982	13.414	0.0182772	2.89644	0.215926		116.759	3.35141	115.056	14.5924	79.9505	312.1
107-53	293.528	10924.8	2.17733	22.011	15.7333	0.091863	16.1032	0.0146649	3.43154	0.213097		93.8497	3.19716	89.2373	13.7576	-32.4204	383.567
107-54	258.641	12852.7	2.78609	20.9565	11.703	0.0923849	12.0123	0.0140417	2.70825	0.225456		89.8888	2.41752	89.7226	10.3156	85.3272	278.383
107-55	261.857	18057	1.72524	19.3832	7.10796	0.178991	7.54575	0.0251625	2.53281	0.335661		160.201	4.00758	167.192	11.6324	267.339	163.217
107-56	65.8106	8546.4	1.55517	25.6783	18.2291	0.135335	18.3877	0.0252044	2.40963	0.131046		160.464	3.81887	128.881	22.2594	-420.55	480.635
107-57	456.964	13868.5	1.40569	20.063	5.28828	0.0911189	5.98746	0.0132588	2.8078	0.468948		84.91	2.36847	88.5451	5.07706	187.651	123.171
107-58	39.1812	3216.19	1.05639	8.82696	155.515	0.211461	155.819	0.0135375	9.72386	0.0624048		86.6832	8.37254	194.778	283.296	1852.82	45.9436
107-60	842.719	35213.4	0.848002	21.0537	2.70088	0.0999619	3.11852	0.0152638	1.55898	0.49991		97.6533	1.51092	96.7411	2.87764	74.3248	64.2176
107-61	195.632	1308.19	4.026	15.9448	33.7323	0.124996	34.8908	0.0144549	8.91647	0.255553		92.5155	8.19021	119.592	39.3827	698.614	738.469
107-62	68.38	7769.27	1.66684	25.4354	26.403	0.15766	26.946	0.0290843	5.38252	0.199752		184.815	9.80644	148.653	37.2786	-395.722	697.981
107-63	87.5095	5244.97	1.68504	22.3741	15.9386	0.171639	16.0784	0.0278523	2.11562	0.131582		177.092	3.69561	160.84	23.9208	-72.2517	391.6
107-64	57.229	3013.54	1.58361	9.95818	251.507	0.191098	251.609	0.0138017	7.14832	0.0284105		88.3634	6.27341	177.565	434.618	1631.86	655.868
107-65	74.8466	3602.09	3.71728	22.8722	42.4179	0.145962	42.5479	0.0242128	3.32243	0.078087		154.226	5.06325	138.34	55.0811	-126.341	1090.91
107-67	87.1515	9551.96	1.75582	19.2082	22.4065	0.129156	22.8037	0.0179928	4.23787	0.185841		114.958	4.82858	123.339	26.4907	288.083	517.82
107-68	114.258	9014.77	1.24799	24.0631	20.7986	0.145958	20.9314	0.025473	2.35356	0.112442		162.153	3.76876	138.337	27.0764	-253.272	531.374
107-69	63.4099	6637.29	2.18661	26.0762	31.3988	0.0969486	31.6303	0.0183351	3.81969	0.12076		117.125	4.43343	93.9558	28.3924	-460.989	846.363
107-70	228.019	13408.7	4.93622	21.2152	10.5545	0.0978618	10.7319	0.0150577	1.94355	0.181099		96.3445	1.85858	94.8007	9.71375	56.1513	252.296
107-71	113.521	6948.01	1.93499	22.7866	14.2143	0.158145	14.4565	0.0261357	2.63529	0.182291		166.317	4.32688	149.078	20.0466	-117.093	351.882
107-72	129.795	8460.06	2.57976	22.1277	16.1396	0.13606	16.3911	0.0218357	2.8607	0.174528		139.247	3.94073	129.529	19.9353	-45.2611	394.545
107-73	226.307	382855	1.76225	8.94801	0.240173	5.02266	1.33116	0.325956	1.30932	0.983589		1818.75	20.7489	1823.15	11.2726	1828.16	4.35496
107-74	96.9586	6731.47	1.65352	19.7531	29.4925	0.100209	29.7223	0.0143563	3.68902	0.124116		91.8886	3.36574	96.9696	27.4949	223.766	695.337
107-75	126.78	8327.16	1.43531	19.8365	10.2724	0.176395	10.6755	0.0253776	2.90599	0.272211		161.553	4.63639	164.954	16.2551	214.063	238.477
107-76	74.0021	2468.32	2.11247	17.8945	36.553	0.112273	37.6901	0.0145711	9.18837	0.243787		93.2536	8.50682	108.042	38.6482	447.702	838.239
107-77	389.691	15497.2	1.71378	20.7702	5.44755	0.0913646	6.32646	0.0137631	3.21687	0.508479		88.1178	2.81535	88.7738	5.37778	106.423	128.767
107-78	202.856	57125.4	1.52674	21.882	5.29886	0.16589	5.57595	0.0263273	1.73589	0.311317		167.521	2.87052	155.846	8.05603	-18.1749	128.233
107-79	253.403	12575.7	1.59812	20.3258	7.5035	0.0926738	8.09934	0.0136616	3.04907	0.376459		87.4724	2.64908	89.9911	6.97514	157.302	175.811
107-80	49.3453	20461.8	1.76728	11.4546	1.77693	2.81488	2.317	0.23385	1.48695	0.641758		1354.65	18.1674	1359.51	17.3611	1367.14	34.2118
107-81	137.421	9245.29	1.37893	25.3464	23.5669	0.0933592	23.9149	0.0171622	4.06503	0.169979		109.696	4.42144	90.6278	20.7373	-386.594	619.981
107-82	92.1704	92549.4	1.98263	9.4475	0.742636	4.30772	2.12272	0.295164	1.98858	0.936805		1667.28	29.2147	1694.84	17.4946	1729.08	13.6301
107-83	76.6443	3428.86	1.09261	24.0929	18.0213	0.0891891	18.6957	0.0155847	4.9761	0.266163		99.6908	4.92255	86.7477	15.5458	-256.399	459.657
107-84	483.085	22725.8	1.29497	20.7861	6.48412	0.093377	7.02254	0.0140771	2.6967	0.384006		90.1138	2.41319	90.6443	6.08974	104.618	153.375
107-85	234.471	24156.3	1.30205	19.9978	6.94159	0.183133	6.98838	0.0265611	0.807333	0.115525		168.99	1.34658	170.753	10.9839	195.274	161.509
107-86	380.054	103252	2.15517	20.3902	3.6246	0.187465	3.91858	0.0277229	1.48914	0.380019		176.281	2.5895	174.464	6.28149	149.921	84.9835
107-87	85.9541	3787.68	1.28368	21.0963	17.5393	0.13033	17.7596	0.0199411	2.78875	0.157028		127.284	3.51482	124.394	20.7953	69.5332	420.01
107-88	422.047	17517.3	1.01503	21.6279	5.32987	0.0874733	5.50008	0.0137211	1.35769	0.246849		87.8505	1.18465	85.147	4.4922	9.98033	128.298
107-89	36.0949	5843.2	1.94515	22.9064	47.7409	0.134957	47.9193	0.0224209	4.13184	0.086225		142.938	5.84097	128.543	57.92	-130.035	1243.72
107-90	83.4853	3514.7	2.05602	17.4731	7.46157	0.380749	7.60166	0.0482512	1.45269	0.191102		303.776	4.31058	327.589	21.2876	500.455	164.491
107-91	384.491	17464.6	2.65424	20.992	4.2517	0.091225	4.39633	0.0138889	1.11838	0.25439		88.9172	0.987606	88.6439	3.73183	81.2669	100.941
107-92	91.2339	4973.54	2.36826	21.8184	14.0021	0.146226	14.662	0.0231392	4.34892	0.296613		147.465	6.34034	138.575	18.9945	-11.1455	339.608
107-93	267.99	20855.4	1.39428	21.8274	5.43846	0.155582	5.69554	0.0246296	1.69186	0.29705		156.849	2.62165	146.828	7.7863	-12.1365	131.468
107-94	36.7964	4666.24	2.09564	23.4895	27.7646	0.251416	27.9803	0.0428317	3.46797	0.123943		270.361	9.18215	227.726	57.1388	-192.541	706.068
107-95	434.913	287482	3.00569	9.14516	0.203753	4.59365	3.71005	0.304683	3.70445	0.998491		1714.49	55.7694	1748.12	30.9461	1788.55	3.71255
107-96	59.0792	10073.1	1.92172	20.9945	26.5424	0.137078	27.0379	0.0208723	5.15255	0.190567		133.167	6.7911	130.438	33.1081	80.9867	639.842
107-97	569.626	90883.6	1.93363	20.8609	4.06523	0.0936958	4.68562	0.0141759	2.33001	0.497269		90.7422	2.09949	90.9403	4.07589	96.1649	96.2654
107-98	291.069	12334.2	1.12558	20.6605	3.12494	0.171136	4.05738	0.0256438	2.58787	0.637818		163.226	4.17105	160.405	6.02026	118.915	73.6871
107-99	266.652	18911.4	1.59573	20.0962	4.56175	0.206073	5.02468	0.0300355	2.10662	0.419254		190.77	3.95992	190.252	8.71761	183.804	106.319
107-101	127.695	9192.91	1.66222	22.301	18.9471	0.118532	19.2044	0.0191716	3.13366	0.163174		122.418	3.79998	113.74	20.667	-64.2635	465.847
107-102	172.432	17251.5	1.34722	24.3233	6.75939	0.102826	7.02726	0.0181395	1.92174	0.273469		115.887	2.20714	99.3819	6.65303	-280.571	172.251
107-103	73.475	2042.68	1.13198	23.3104	31.8027	0.103662	32.2196	0.0175255	5.16615	0.160342		111.998	5.73602	100.151	30.7374	-173.433	810.101
107-104	276.27	21449.2	1.39547	20.3996	3.71089	0.204579	4.20445	0.0302678	1.97653	0.470104		192.224	3.74328	188.993	7.25057	148.838	87.0039
107-105	392.974	21818.7	2.00459	21.5715	8.74836	0.0927043	9.37002	0.0145037	3.35611	0.358175		92.8255	3.093	90.0194	8.07192	16.2517	210.54
Sample 10NB6
10NB6-1	746.314	7189	2.46501	20.7831	9.81082	0.0996317	10.9918	0.0150178	4.95649	0.450927		96.0914	4.72744	96.4363	10.1126	104.953	232.316
10NB6-2	384.676	4325.01	1.65161	19.3394	29.5184	0.0936793	30.8855	0.0131397	9.08743	0.294229		84.1522	7.59758	90.9251	26.8683	272.497	689.947
10NB6-3	23.3566	17203	1.74263	5.34025	5.74874	12.5826	6.29177	0.487338	2.55704	0.40641		2559.15	54.0116	2648.92	59.2493	2718.21	94.8434
10NB6-5	478.038	5773.98	1.4669	19.9265	21.6625	0.13365	22.1469	0.0193152	4.60665	0.208004		123.326	5.62722	127.372	26.5174	203.562	507.912
10NB6-6	626.04	10929.6	1.39188	19.1072	11.0641	0.154829	11.5104	0.0214559	3.17415	0.275763		136.851	4.29807	146.166	15.6708	300.152	253.021
10NB6-7	414.356	7593.75	2.2734	24.7429	24.4781	0.0872112	25.8462	0.0156503	8.29758	0.321037		100.107	8.24228	84.9021	21.0546	-324.314	636.541
10NB6-8	358.63	4065.3	2.11839	27.4818	31.0484	0.0750891	31.9561	0.0149665	7.56205	0.236639		95.7656	7.18832	73.5174	22.6667	-601.681	861.146
10NB6-9	227.711	59103.6	3.21599	9.55811	2.07176	3.88113	3.64542	0.269048	2.99948	0.822808		1535.97	40.9941	1609.76	29.4399	1707.68	38.132
10NB6-10	529.984	4768.03	2.53824	23.9646	22.7882	0.0876154	23.4116	0.0152283	5.36654	0.229226		97.4277	5.18918	85.2796	19.1521	-242.895	582.082
10NB6-11	1130.8	9259.99	2.40721	23.2051	18.4396	0.0901694	18.7583	0.0151754	3.44348	0.183571		97.0922	3.3183	87.6611	15.7552	-162.155	461.858
10NB6-12	438.846	3915.85	1.68588	24.2409	21.5554	0.0845555	22.4365	0.0148659	6.22574	0.277483		95.1261	5.87882	82.4188	17.7631	-271.946	553.127
10NB6-13	606.4	3866.07	2.01917	23.0897	20.5686	0.0855355	22.5932	0.014324	9.34791	0.413749		91.6831	8.50981	83.3359	18.0782	-149.772	514.832
10NB6-14	752.939	4329.32	1.95917	23.8626	24.2382	0.0819329	25.1434	0.01418	6.68574	0.265905		90.768	6.02598	79.9606	19.3359	-232.128	618.712
10NB6-15	526.147	4802.95	2.87364	21.3076	13.0141	0.0998635	14.5692	0.0154326	6.54935	0.449535		98.7253	6.41661	96.6503	13.4325	45.735	312.09
10NB6-16	607.912	8548.62	1.73434	21.0622	19.9745	0.0878709	22.1498	0.013423	9.5725	0.432171		85.9544	8.17338	85.5181	18.1683	73.3571	478.934
10NB6-18	268.592	4595.82	1.45246	26.6199	58.3716	0.0717736	59.8677	0.013857	13.3003	0.222162		88.715	11.7186	70.3811	40.7303	-515.802	1689.78
10NB6-19	150.895	1901.11	2.56996	3.33181	1067.27	0.734362	1067.4	0.0177456	16.0527	0.0150391		113.392	18.0433	559.11	#NUM!	3470.92	830.325
10NB6-20	186.73	1589.52	1.31047	18.2387	39.0109	0.14425	42.1324	0.0190813	15.9149	0.377737		121.847	19.2098	136.822	53.982	405.213	905.359
10NB6-22	931.317	10612.8	1.73829	22.9914	17.9389	0.0859602	18.382	0.0143338	4.01182	0.218247		91.7458	3.65461	83.7331	14.7754	-139.203	447.127
10NB6-23	1329.73	18523.5	2.06174	20.316	9.97847	0.0990608	10.9766	0.0145962	4.57329	0.416642		93.413	4.24125	95.909	10.0459	158.416	233.975
10NB6-24	781.683	7215.76	2.29547	27.0353	28.1583	0.0754193	28.6712	0.0147881	5.39865	0.188295		94.6322	5.07155	73.8291	20.4192	-557.337	771.007
10NB6-25	876.316	13813.1	2.36489	22.134	11.1594	0.0928106	11.6102	0.0148989	3.2038	0.275948		95.3363	3.03191	90.1182	10.0123	-45.9465	272.066
10NB6-26	272.388	8260.3	2.27985	18.5934	37.1962	0.117299	38.4014	0.0158181	9.54501	0.248559		101.172	9.58149	112.621	40.958	361.928	866.631
10NB6-27	644.615	7342.42	2.07134	22.7017	28.6876	0.0863378	29.1421	0.0142154	5.12675	0.175922		90.9929	4.63221	84.0862	23.5215	-107.897	718.539
10NB6-28	191.607	4785.09	1.40884	31.938	41.6956	0.184289	41.8623	0.0426879	3.73244	0.0891598		269.472	9.85057	171.744	66.2384	-1029.41	1289.34
10NB6-29	430.387	8404.43	1.86814	28.4157	65.7879	0.072384	66.6995	0.0149176	10.9895	0.164761		95.4549	10.4127	70.9593	45.7445	-693.439	2029.37
10NB6-30	1528.14	27109.4	1.71963	21.9265	9.00835	0.104784	9.33457	0.0166634	2.44619	0.262058		106.534	2.58461	101.183	8.98987	-23.0905	218.468
10NB6-31	221.638	1783.38	2.44875	43.6197	91.375	0.0440738	92.1387	0.0139432	11.8381	0.128481		89.2627	10.4942	43.7937	39.5131	-2077.07	1640.71
10NB6-32	178.639	1858.64	1.29331	23.8778	61.031	0.0957812	63.3021	0.0165872	16.8041	0.265459		106.051	17.6752	92.8746	56.2404	-233.733	1689.21
10NB6-33	359.411	3689.14	1.48779	33.071	65.1083	0.055657	65.4864	0.0133495	7.02671	0.1073		85.4872	5.96728	54.9966	35.0712	-1134.67	2197.74
10NB6-34	1015.68	18496.8	4.51579	25.7379	20.8567	0.0711971	21.3512	0.0132903	4.56865	0.213976		85.1105	3.86285	69.8348	14.4104	-426.631	551.793
10NB6-36	981.332	16487	3.69502	20.5791	23.7702	0.101844	23.9963	0.0152005	3.2863	0.13695		97.2517	3.17199	98.4768	22.5247	128.262	566.28
10NB6-37	484.502	4398.33	3.0036	23.5651	25.7138	0.0904231	26.6003	0.0154542	6.81013	0.256016		98.8623	6.68129	87.8974	22.4012	-200.586	653.383
10NB6-38	710.522	4519.94	1.67009	19.3979	21.4431	0.0982996	22.8827	0.0138295	7.98813	0.349091		88.5396	7.02431	95.2055	20.7983	265.609	497.073
10NB6-39	1262.63	19754.6	3.53913	20.8814	14.457	0.103656	14.71	0.0156982	2.71661	0.184678		100.411	2.70664	100.145	14.0291	93.7955	343.884
10NB6-42	238.125	3069.42	1.35081	15.54	37.2239	0.180493	39.9341	0.0203428	14.4609	0.36212		129.822	18.5857	168.484	62.0742	753.134	813.074
10NB6-43	1428.52	29338.4	2.41621	23.371	16.089	0.0916556	16.3056	0.0155359	2.64852	0.16243		99.3807	2.61193	89.0445	13.9017	-179.908	403.681
10NB6-44	245.579	2448.12	3.15111	20.7394	37.5868	0.131828	39.762	0.019829	12.9711	0.326218		126.575	16.2581	125.739	47.0583	109.946	916.402
10NB6-45	1117.91	19869.1	2.53043	21.8773	7.96472	0.102728	10.435	0.0162998	6.74185	0.64608		104.228	6.9704	99.2914	9.8709	-17.6643	192.864
10NB6-46	1266.42	19763.8	1.47535	22.4337	11.2155	0.102858	11.4686	0.0167355	2.39649	0.20896		106.991	2.54288	99.4112	10.8612	-78.7614	275.169
10NB6-47	519.408	4313.21	2.27864	21.9081	35.4214	0.102194	39.0407	0.0162378	16.4165	0.420497		103.835	16.9096	98.7993	36.7709	-21.0651	881.428
10NB6-48	1391.86	13633.1	2.60667	21.4502	8.00755	0.0965173	8.8914	0.0150153	3.86474	0.43466		96.0755	3.68553	93.5564	7.94691	29.7965	192.172
10NB6-49	647.417	7109.15	1.12741	22.0689	22.9854	0.0908289	23.6577	0.0145379	5.60015	0.236715		93.0429	5.17312	88.2752	20.0044	-38.7915	564.47
10NB6-51	96.7198	18564.7	1.56829	11.4364	5.06668	2.92127	11.5707	0.242303	10.4024	0.899029		1398.66	130.81	1387.44	87.743	1370.2	97.5463
10NB6-52	316.33	2525.48	2.46649	73.5087	86.4477	0.0324632	87.1019	0.0173073	10.655	0.122328		110.615	11.6855	32.4388	27.8152	0	815.563
10NB6-53	1217.16	7385.93	1.18877	21.7589	17.34	0.0888751	17.6077	0.0140254	3.05847	0.173701		89.7853	2.72702	86.4549	14.5937	-4.54801	420.986
10NB6-55	1136.15	21074.4	1.98937	20.2354	8.6923	0.106822	9.91913	0.0156772	4.77841	0.481736		100.278	4.75462	103.054	9.72073	167.706	203.361
10NB6-57	705.162	17843.8	5.97117	19.7588	9.87896	0.279905	12.2383	0.0401117	7.22376	0.590257		253.525	17.9586	250.582	27.1825	223.133	228.94
10NB6-58	1526.37	11701	1.35326	21.4789	14.3174	0.0746353	14.5263	0.0116267	2.45442	0.168964		74.5179	1.81845	73.0887	10.2443	26.5602	344.85
10NB6-59	1000.04	8125.58	1.82089	21.0408	10.6408	0.0927283	12.1136	0.0141505	5.78906	0.477898		90.5807	5.2071	90.0417	10.438	75.7566	253.444
10NB6-60	1569.53	12419.9	2.94839	20.6166	4.62633	0.0954236	7.6939	0.0142683	6.14761	0.799024		91.3293	5.57499	92.5432	6.80544	123.928	108.999
10NB6-61	831.964	11172.1	1.52944	26.688	31.2707	0.067717	31.929	0.0131073	6.45016	0.202016		83.9458	5.37954	66.5306	20.5644	-522.625	853.47
10NB6-62	248.022	1065.25	2.523	13.7758	31.8673	0.341092	33.8302	0.034079	11.3558	0.335672		216.027	24.1253	297.999	87.5834	1002.54	663.459
10NB6-63	803.261	7943.71	2.56948	22.0144	9.5424	0.0846429	9.83583	0.0135144	2.38459	0.242439		86.536	2.04974	82.5007	7.79387	-32.7947	231.886
10NB6-64	1052.51	26344.5	1.2774	18.9006	4.62005	0.289199	5.35603	0.0396434	2.70965	0.505906		250.622	6.66066	257.929	12.2003	324.895	104.948
10NB6-65	99.6436	2484.72	2.16216	20.2322	38.558	0.250071	41.0742	0.0366948	14.1553	0.344629		232.313	32.2995	226.634	83.6196	168.078	931.963
10NB6-66	752.351	13054.4	1.96269	22.3104	22.5266	0.0903618	22.7687	0.0146215	3.31155	0.145443		93.5737	3.07636	87.8404	19.1617	-65.2897	555.751
10NB6-67	578.497	4715.54	2.49103	21.8626	15.9735	0.126404	17.2794	0.020043	6.58977	0.381367		127.927	8.34704	120.861	19.6915	-16.0389	388.273
10NB6-68	446.454	3933.57	2.95401	18.3018	34.2444	0.108555	34.7487	0.0144092	5.89804	0.169734		92.2249	5.40074	104.642	34.5642	397.478	788.854
10NB6-69	839.895	7115.64	3.21144	21.5567	17.2884	0.0936371	20.6913	0.0146396	11.3683	0.549426		93.6885	10.5738	90.8858	17.9902	17.8816	417.959
10NB6-70	536.201	4018.46	2.63134	40.7339	62.6099	0.0441843	62.8888	0.0130534	5.91642	0.0940774		83.603	4.91436	43.9011	27.0269	-1823.63	397.734
10NB6-71	988.366	9178.63	1.60679	20.8751	16.8471	0.0951493	17.476	0.0144057	4.64604	0.265852		92.2024	4.25327	92.2889	15.4184	94.534	401.34
10NB6-72	224.201	1595.01	1.96737	18.6749	42.5853	0.100931	46.5616	0.0136704	18.8277	0.40436		87.5281	16.3682	97.6352	43.3697	352.085	1004.92
10NB6-73	161.322	4843.98	1.79285	35.4631	57.5868	0.147364	58.8163	0.0379025	11.9633	0.203401		239.819	28.1632	139.582	76.8506	-1353.42	1989.43
10NB6-75	1591.61	8834.43	2.10146	19.6464	3.88339	0.111245	7.33341	0.0158512	6.22078	0.84828		101.382	6.25741	107.104	7.45442	236.292	89.5991
10NB6-76	1038.24	9410.6	2.19612	20.3436	17.3527	0.0929369	17.8778	0.0137124	4.30103	0.24058		87.7955	3.75051	90.2355	15.4372	155.276	408.927
10NB6-77	1077.49	6193.13	2.33791	24.3618	11.2697	0.0864532	11.7023	0.0152753	3.15247	0.269388		97.7263	3.05756	84.194	9.4555	-284.602	287.888
10NB6-78	3080.02	50719.3	2.37332	20.8599	3.76853	0.122642	7.8845	0.0185545	6.92557	0.878378		118.514	8.13277	117.464	8.74605	96.2337	89.2343
10NB6-79	628.253	4764.2	1.55613	21.1018	17.6356	0.0873956	18.205	0.0133754	4.51755	0.248149		85.6521	3.84378	85.0744	14.8578	68.8973	422.402
10NB6-80	900.175	9548.23	2.63901	24.0239	20.3334	0.0924252	20.9826	0.016104	5.17917	0.246831		102.986	5.29143	89.76	18.0274	-249.141	518.863
10NB6-81	465.571	5454.89	1.76396	23.7646	21.9603	0.0752659	22.4612	0.0129726	4.71737	0.210023		83.0892	3.89447	73.6843	15.9655	-221.761	558.162
10NB6-82	2688.98	22367.9	0.588898	20.5026	7.2858	0.0956014	9.00061	0.0142158	5.2847	0.587149		90.9956	4.77507	92.708	7.97485	137.022	171.359
10NB6-83	352.31	3392.81	2.98166	20.838	29.4268	0.0921007	32.124	0.0139193	12.8849	0.401098		89.1109	11.4029	89.4584	27.5148	98.739	709.667
10NB6-84	581.223	6010.86	2.60791	24.3712	21.7551	0.0844319	23.0626	0.0149239	7.65492	0.331919		95.4948	7.25617	82.3032	18.2343	-285.585	559.888
10NB6-85	364.295	120889	1.80838	13.1306	1.97002	1.84376	2.21557	0.175584	1.01378	0.457573		1042.81	9.76102	1061.2	14.5867	1099.22	39.418
10NB6-86	195.678	30990	1.53481	13.3055	5.5852	1.75581	5.88852	0.169436	1.86551	0.316805		1009	17.424	1029.3	38.1125	1072.73	112.27
10NB6-87	727.731	8287.08	2.00126	21.6937	20.1587	0.0891617	20.4819	0.0140284	3.62432	0.176952		89.8047	3.23224	86.7221	17.0266	2.65905	489.872
10NB6-88	475.118	4942.38	2.82219	26.387	14.191	0.0736023	15.4964	0.0140858	6.22536	0.401728		90.1691	5.57428	72.1122	10.7876	-492.385	378.732
10NB6-89	1505.97	29713	2.61968	20.7351	4.53592	0.0983853	4.93704	0.0147957	1.94928	0.394829		94.6802	1.8321	95.2847	4.49029	110.446	107.13
10NB6-90	1325.06	17907.9	1.35085	23.5823	14.8058	0.0826157	15.097	0.0141302	2.95067	0.195448		90.4515	2.65029	80.6011	11.6984	-202.421	372.809
10NB6-91	185.68	2059.38	1.70544	25.7097	200.062	0.0720396	200.607	0.0134328	14.7691	0.0736221		86.0169	12.6196	70.6331	137.717	-423.748	0
10NB6-92	127.194	18726.7	2.3822	11.9206	6.0551	1.93284	7.28096	0.167106	4.04329	0.555323		996.148	37.3199	1092.52	48.7596	1289.95	117.927
10NB6-93	122.792	1584.87	1.58908	-1.50605	1443.8	-1.67176	1443.89	0.0182605	16.5231	0.0114434		116.653	19.1013	#NUM!	#NUM!	0	83.6852
10NB6-94	284.538	3345.06	1.17347	16.8364	13.6178	0.341706	16.8653	0.0417254	9.94967	0.589947		263.519	25.6907	298.464	43.6403	581.631	296.995
10NB6-95	179.452	1161.34	2.02914	20.9214	116.464	0.0947032	117.59	0.0143699	16.2354	0.138068		91.9749	14.8265	91.8751	103.651	89.3076	1111.49
10NB6-96	664.704	7847.05	1.30162	21.8013	17.2133	0.0930857	18.0805	0.0147186	5.53226	0.305979		94.1904	5.17297	90.3738	15.6352	-9.25507	418.243
10NB6-97	620.565	3469.12	2.14933	22.6835	17.1284	0.083341	17.6274	0.0137109	4.16478	0.236267		87.7858	3.6313	81.2812	13.7702	-105.921	423.942
10NB6-98	1314.89	18679	2.63295	20.9651	9.81412	0.0999548	10.1508	0.0151984	2.59259	0.255408		97.2383	2.50207	96.7346	9.36636	84.3122	233.295
10NB6-100	1105.89	12284.4	1.16805	20.5951	18.5033	0.120061	18.772	0.0179334	3.16494	0.168599		114.582	3.5944	115.127	20.4342	126.437	438.769
10NB6-101	322.963	3323.96	0.902725	17.8653	46.803	0.0997181	47.5382	0.0129206	8.32851	0.175196		82.7582	6.84847	96.5161	43.796	451.331	1097.19
10NB6-102	291.391	2034.21	1.48131	24.5	36.2054	0.0910321	36.6966	0.0161756	5.98461	0.163083		103.44	6.14108	88.4644	31.0992	-299.041	951.63
10NB6-103	1147.83	11486.7	2.70651	21.4781	16.7746	0.0815068	18.6674	0.0126966	8.19045	0.438757		81.3323	6.61964	79.5606	14.2859	26.6508	404.695
10NB6-104	458.44	7676.04	1.09774	21.9993	15.5876	0.142202	16.8878	0.0226889	6.49818	0.384785		144.628	9.29353	135.003	21.3516	-31.1304	379.882
10NB6-105	474.798	10965.7	2.40795	21.2546	21.7548	0.101294	22.4422	0.0156147	5.51187	0.245603		99.8811	5.46289	97.9697	20.9621	51.7093	524.58
Sample 12SL1
12SL_1	549.299	44941.4	1.51811	21.0887	5.45814	0.0919974	7.20964	0.0140709	4.71037	0.653343		90.0749	4.21335	89.3623	6.1674	70.3614	129.894
12SL_2	106	5292.6	2.75691	20.3863	24.151	0.110587	24.6723	0.0163509	5.04479	0.204472		104.552	5.23189	106.502	24.9504	150.319	573.241
12SL_3	121.893	7975.22	2.08398	22.4678	41.7488	0.250316	42.3955	0.0407894	7.37687	0.174001		257.724	18.637	226.832	86.3902	-82.4766	1063.36
12SL_4	331.543	14068	2.13239	21.1376	13.7009	0.165974	13.8314	0.0254446	1.89519	0.137021		161.974	3.03147	155.919	19.9941	64.8579	327.515
12SL_5	194.216	14991.3	3.16461	21.3657	21.0007	0.202809	21.1124	0.0314271	2.16839	0.102707		199.474	4.25912	187.5	36.1611	39.2576	507.22
12SL_8	413.723	28643.3	1.78848	19.7451	7.59093	0.184157	7.93802	0.0263722	2.32162	0.292469		167.803	3.84548	171.632	12.5356	224.712	175.685
12SL_10	319.371	16503.2	1.77497	20.0433	11.8984	0.201374	12.1581	0.0292734	2.49975	0.205603		185.999	4.58308	186.288	20.6958	189.983	277.642
12SL_11	681.595	87729.7	9.06137	19.3672	2.96154	0.308687	4.02031	0.0433595	2.71886	0.67628		273.623	7.28374	273.163	9.62908	269.199	67.9065
12SL_12	78.4543	3954.04	2.33515	26.7674	35.1356	0.113475	35.4312	0.0220294	4.56717	0.128903		140.469	6.34608	109.139	36.6794	-530.583	965.941
12SL_13	426.704	43959	2.77897	20.5558	9.68992	0.125597	9.97743	0.0187246	2.3779	0.238328		119.59	2.81752	120.133	11.3048	130.876	228.338
12SL_14	235.984	37459.4	4.01811	20.9674	10.2143	0.188848	10.3709	0.0287182	1.79527	0.173106		182.521	3.23079	175.646	16.7291	84.0429	242.869
12SL_15	458.678	19825.6	1.86914	23.3885	8.90169	0.0871736	9.09374	0.0147872	1.85904	0.204431		94.6264	1.7463	84.8671	7.404	-181.77	222.587
12SL_16	60.9918	5491.32	1.90532	20.307	20.699	0.202161	21.1541	0.0297743	4.36424	0.206307		189.135	8.13441	186.953	36.1362	159.488	488.787
12SL_17	175.376	12745.4	1.93607	25.9052	21.0766	0.081295	21.6747	0.0152739	5.05683	0.233305		97.7174	4.90414	79.3617	16.5478	-443.648	559.648
12SL_18	276.422	31520.6	2.34275	21.2682	11.5628	0.144243	11.6915	0.0222497	1.72994	0.147966		141.859	2.42726	136.816	14.9661	50.1707	276.848
12SL_19	441.677	41995.9	1.37111	19.1886	11.4862	0.106507	11.7243	0.0148224	2.35051	0.200483		94.8502	2.21314	102.765	11.4593	290.432	263.166
12SL_20	824.119	45794.2	1.65928	21.2925	3.77668	0.0941872	4.01519	0.0145452	1.36325	0.339524		93.0887	1.25992	91.3965	3.50944	47.4251	90.2475
12SL_21	231.578	45310.5	1.86361	20.6267	12.1351	0.158615	12.2598	0.0237285	1.74427	0.142276		151.177	2.60626	149.49	17.0434	122.781	286.719
12SL_22	875.242	476921	9.19739	11.3669	0.154294	2.79578	0.734083	0.230486	0.717685	0.977661		1337.04	8.66602	1354.41	5.49012	1381.92	2.96425
12SL_23	241.464	6027.87	2.45582	18.9579	8.45631	0.126326	9.37307	0.0173693	4.04295	0.431336		111.008	4.44959	120.791	10.6747	317.964	192.525
12SL_24	291.947	13381.3	1.77457	19.7749	8.53129	0.127129	9.22538	0.018233	3.51066	0.380544		116.479	4.05245	121.514	10.5658	221.214	197.655
12SL_25	113.937	10529	2.35054	20.4542	27.4537	0.0965294	28.2453	0.0143199	6.64017	0.23509		91.6576	6.04316	93.5676	25.2525	142.566	655.114
12SL_26	407.262	4461.6	1.70642	21.0356	11.9185	0.101469	12.1813	0.0154806	2.51653	0.20659		99.03	2.47308	98.1316	11.3947	76.3336	284.014
12SL_27	567.806	24742.1	2.09665	19.5618	5.32893	0.120788	6.84067	0.0171368	4.28921	0.627016		109.535	4.65851	115.786	7.48577	246.224	122.79
12SL_28	685.669	75063.4	4.912	10.929	5.16672	0.388851	8.55815	0.0308221	6.82253	0.797197		195.692	13.1505	333.53	24.3344	1457.01	98.3196
12SL_29	1528.03	132000	1.44209	19.9175	2.18406	0.170397	4.19814	0.0246147	3.58529	0.854018		156.755	5.55235	159.763	6.20613	204.618	50.6932
12SL_30	137.798	11766	1.80618	19.332	12.776	0.168438	13.0023	0.0236165	2.41493	0.185731		150.472	3.5917	158.062	19.0341	273.369	293.797
12SL_31	196.255	11627	2.28587	19.2134	19.3071	0.1116	19.846	0.0155513	4.59367	0.231465		99.4784	4.53463	107.428	20.2337	287.499	444.936
12SL_32	738.345	34279.7	1.68455	20.8018	4.59189	0.0939865	5.20336	0.0141796	2.44734	0.470338		90.7658	2.20578	91.2102	4.5391	102.863	108.589
12SL_33	354.842	33835.3	4.4218	20.6794	6.08153	0.173334	6.25093	0.0259968	1.44542	0.231232		165.445	2.36094	162.308	9.37668	116.782	143.5
12SL_35	91.2323	5254.43	2.75135	19.5793	34.4547	0.128596	35.3952	0.0182609	8.10532	0.228995		116.655	9.37026	122.835	40.9731	244.214	815.518
12SL_36	686.466	40599.7	3.23638	21.0521	4.45013	0.15637	4.68076	0.0238752	1.45114	0.310023		152.101	2.18137	147.521	6.42701	74.4868	105.792
12SL_37	100.517	5309.25	1.46517	18.6584	38.4082	0.121436	38.7542	0.0164332	5.16661	0.133317		105.074	5.38476	116.373	42.636	354.062	898.16
12SL_38	775.734	27609.9	1.97837	21.5492	4.17036	0.097876	4.90152	0.015297	2.57546	0.52544		97.864	2.50141	94.8139	4.43697	18.7655	100.196
12SL_39	86.8263	3638.04	1.03439	20.1812	204.299	0.0950157	204.434	0.0139073	7.44015	0.0363938		89.0344	6.57876	92.165	182.044	173.96	0
12SL_41	74.6357	4004.47	1.69214	19.7461	32.4685	0.168261	32.8358	0.0240971	4.89774	0.149159		153.498	7.42912	157.909	48.0557	224.587	768.75
12SL_42	684.314	21882.4	2.62124	20.9816	4.65777	0.0953645	4.86002	0.0145119	1.38741	0.285475		92.8773	1.27935	92.4884	4.29634	82.4439	110.591
12SL_43	137.657	14712.3	2.83443	23.2214	18.3714	0.181236	18.4631	0.0305233	1.83741	0.0995183		193.822	3.50831	169.123	28.7711	-163.906	460.262
12SL_44	260.017	14473.4	2.03805	20.5914	13.6175	0.0958299	14.3203	0.0143115	4.43115	0.309431		91.6039	4.0304	92.9197	12.7164	126.859	321.773
12SL_45	102.463	6734.13	2.53978	27.7492	34.2527	0.118721	34.366	0.0238933	2.78757	0.0811143		152.215	4.1934	113.912	37.0473	-628.085	959.603
12SL_46	88.0859	17546.7	1.42396	18.9319	19.9869	0.208167	20.4206	0.0285829	4.18626	0.205002		181.673	7.49915	192.014	35.7407	321.128	458.134
12SL_47	202.442	12567.1	2.60271	21.7045	11.7115	0.146856	11.9189	0.0231175	2.21343	0.185708		147.328	3.22402	139.132	15.4982	1.44482	283.014
12SL_48	115.029	6065.42	3.06896	18.5628	19.5039	0.136941	21.3003	0.0184364	8.56171	0.401952		117.767	9.9913	130.316	26.056	365.643	443.393
12SL_49	450.492	43760.3	3.19867	20.1002	4.15005	0.1267	4.43759	0.0184703	1.57139	0.354109		117.981	1.83708	121.128	5.06696	183.339	96.7038
12SL_50	617.642	23370.6	1.60572	20.801	6.59431	0.0957936	6.87385	0.0144517	1.94035	0.28228		92.4949	1.78191	92.8861	6.10159	102.941	156.028
12SL_51	529.124	24909.3	1.79802	21.3141	7.671	0.100136	7.74008	0.0154795	1.03177	0.133302		99.0231	1.01388	96.9023	7.15365	44.9957	183.541
12SL_52	147.201	11993.7	1.89383	29.9228	74.9883	0.0726518	75.2756	0.0157669	6.57069	0.0872885		100.847	6.5748	71.2128	51.8142	-838.993	2494.77
12SL_53	128.35	8061.48	2.82342	32.756	42.9986	0.0775344	43.213	0.0184198	4.29947	0.0994948		117.661	5.01292	75.8242	31.5826	NA	NA
12SL_55	597.572	35396	1.64474	20.7581	8.53654	0.0962098	8.95906	0.0144846	2.71886	0.303476		92.7038	2.50245	93.2717	7.98412	107.844	201.942
12SL_56	631.87	44839.2	1.3437	21.2503	6.37304	0.0994537	6.47933	0.015328	1.16876	0.180382		98.061	1.13742	96.272	5.95126	52.1836	152.231
12SL_57	224.951	21717	1.47633	20.8664	5.65439	0.220147	5.91643	0.0333165	1.74126	0.294309		211.272	3.61915	202.032	10.8394	95.4894	133.934
12SL_59	1364.5	95840.4	6.0193	21.1128	1.8732	0.124159	2.10961	0.0190119	0.970343	0.459964		121.408	1.16705	118.836	2.36583	67.6691	44.5655
12SL_60	328.251	36542.7	3.49115	22.3324	10.1226	0.114358	10.4251	0.0185225	2.49326	0.23916		118.311	2.92291	109.944	10.8634	-67.6933	247.683
12SL_61	751.043	44370.4	3.07187	21.0101	4.28081	0.110771	4.39529	0.0168793	0.99663	0.22675		107.903	1.06644	106.67	4.45063	79.2139	101.672
12SL_62	103.257	5766.35	3.01868	20.7065	17.814	0.193843	17.9671	0.0291109	2.34072	0.130278		184.981	4.26836	179.903	29.6301	113.716	423.177
12SL_63	1035.71	106114	1.52531	20.2117	3.76553	0.16394	3.89244	0.0240319	0.985824	0.253266		153.088	1.4914	154.147	5.56688	170.436	87.9571
12SL_64	441.134	25339	2.27043	21.607	6.48594	0.0958458	6.63423	0.0150199	1.39489	0.210256		96.1045	1.3306	92.9344	5.89182	12.2997	156.09
12SL_65	291.85	35305.5	1.52028	20.5127	4.2326	0.204522	4.45439	0.0304272	1.38803	0.31161		193.222	2.64218	188.945	7.67983	135.819	99.5134
12SL_66	553.396	32098.3	2.28461	20.3066	4.92863	0.126646	5.25849	0.0186521	1.83312	0.348602		119.132	2.16377	121.08	6.00207	159.514	115.39
12SL_68	1010.12	23779.2	2.52637	21.0525	3.63876	0.0918866	3.79207	0.0140299	1.06735	0.281468		89.8141	0.95198	89.2593	3.24028	74.463	86.499
12SL_69	474.586	25543	1.45539	21.7035	7.21638	0.0910159	7.35815	0.0143267	1.43747	0.195357		91.7005	1.30883	88.4493	6.2329	1.57543	174.061
12SL_70	150.122	10879.3	2.79089	20.5816	19.1137	0.136857	19.4531	0.0204288	3.61801	0.185987		130.365	4.66926	130.24	23.7825	127.981	453.335
12SL_71	309.535	10097.1	1.63194	21.3151	13.2076	0.0932758	13.3616	0.0144197	2.0228	0.151388		92.2914	1.85357	90.5504	11.5757	44.9176	316.815
12SL_72	96.0305	3458.01	1.75302	24.2529	32.8263	0.0971909	33.2774	0.0170957	5.46054	0.164091		109.275	5.9167	94.18	29.9398	-273.2	853.907
12SL_73	272.316	25262.2	3.43778	19.1238	7.06696	0.186664	7.21581	0.02589	1.45805	0.202063		164.774	2.37204	173.779	11.5257	298.164	161.405
12SL_74	167.637	16226.4	1.44431	19.3641	22.6892	0.106399	23.4099	0.0149429	5.76401	0.246221		95.6155	5.47062	102.666	22.8628	269.568	526.24
12SL_75	54.6724	5250.23	3.24388	20.2377	26.5933	0.306283	27.1772	0.0449556	5.60355	0.206185		283.477	15.5406	271.296	64.7903	167.434	631.033
12SL_76	901.238	53378.2	8.71421	20.568	3.97448	0.117073	4.07722	0.0174641	0.909521	0.223074		111.609	1.00637	112.415	4.33881	129.519	93.5494
12SL_77	264.623	12211.3	1.21118	21.5001	8.97049	0.101263	9.17371	0.0157903	1.92022	0.209318		100.996	1.92423	97.9419	8.56538	24.2189	215.602
12SL_78	44.5321	3223.55	1.833	17.7979	40.4601	0.184619	40.9889	0.023831	6.56262	0.160107		151.823	9.84715	172.027	64.9509	459.763	933.146
12SL_79	749.379	61210.8	1.4104	20.3573	5.62756	0.116122	5.82249	0.0171448	1.49399	0.256589		109.586	1.62336	111.55	6.15101	153.677	131.902
12SL_80	379.732	14581.2	2.28459	21.8171	16.8714	0.0971553	16.907	0.0153731	1.09694	0.0648808		98.3476	1.07063	94.1471	15.203	-11.0011	409.969
12SL_81	775.393	43943.2	3.61652	20.1174	1.90808	0.127574	2.25278	0.0186137	1.19759	0.531608		118.888	1.41075	121.915	2.58801	181.349	44.4488
12SL_82	234.272	14116.8	1.82061	20.6914	7.1867	0.161597	7.43511	0.0242505	1.90585	0.256331		154.464	2.90886	152.1	10.5029	115.441	169.69
12SL_83	371.102	11679	1.92567	21.1444	7.42238	0.0934539	7.87072	0.0143315	2.61852	0.332691		91.7309	2.38498	90.7158	6.83043	64.1015	176.95
12SL_84	378.28	60042.1	2.30279	21.1191	7.32928	0.150478	7.5268	0.0230488	1.713	0.227587		146.896	2.48787	142.334	9.99656	66.9148	174.647
12SL_85	531.426	61025.9	3.01952	21.0196	6.1942	0.0921577	6.52894	0.0140493	2.0637	0.316086		89.9373	1.84315	89.5114	5.59401	78.149	147.232
12SL_87	159.71	12215.8	1.27668	21.4957	16.4618	0.149937	16.8252	0.0233755	3.47825	0.206728		148.954	5.12159	141.857	22.2791	24.6869	397.205
12SL_88	181.184	6370.6	1.87161	26.6304	29.5183	0.0749168	29.6225	0.0144696	2.48187	0.0837833		92.6085	2.28199	73.3546	20.9661	-516.854	802.865
12SL_89	597.266	29085.2	1.77916	21.1551	8.1881	0.0926784	8.6689	0.0142198	2.8469	0.328404		91.0209	2.57306	89.9954	7.466	62.8803	195.307
12SL_90	187.463	16037.9	2.74059	19.9329	15.6194	0.126354	16.2727	0.0182667	4.56448	0.2805		116.692	5.27847	120.817	18.5376	202.811	364.438
12SL_91	320.108	15993.1	1.9833	21.3545	16.256	0.0995623	16.4194	0.01542	2.31053	0.14072		98.6448	2.26187	96.3722	15.0971	40.5135	391.019
12SL_92	134.517	7212.72	2.27163	22.5316	20.1456	0.120598	20.7364	0.0197075	4.91469	0.237008		125.807	6.12308	115.614	22.6634	-89.4285	498.213
12SL_93	92.7312	8666.5	2.62125	19.6631	18.7516	0.208357	19.1115	0.0297138	3.69153	0.193157		188.757	6.86699	192.173	33.4731	234.364	436.073
12SL_94	737.186	49272.1	2.81447	21.2599	7.64031	0.0910843	7.89639	0.0140444	1.99467	0.252605		89.906	1.78088	88.5129	6.69345	51.1043	182.604
12SL_95	108.42	9513.92	2.05589	20.2427	19.3941	0.179164	19.5252	0.0263037	2.25879	0.115686		167.373	3.73194	167.341	30.132	166.862	456.817
12SL_96	444.532	22526.9	1.36552	21.7125	10.8541	0.098296	10.9872	0.0154791	1.70532	0.155209		99.0202	1.6757	95.2022	9.98501	0.550724	262.228
12SL_97	142.253	12319.3	2.92556	21.534	20.8291	0.121934	21.2339	0.0190436	4.12655	0.194337		121.609	4.97121	116.824	23.4367	20.4373	504.78
12SL_98	332.685	20646.5	2.26995	20.4151	6.57506	0.129824	6.83349	0.0192223	1.86153	0.272412		122.739	2.26321	123.939	7.97306	147.05	154.323
12SL_99	41.5475	4647.88	2.85133	39.5	76.975	0.111955	77.4029	0.0320731	8.12749	0.105002		203.51	16.2819	107.752	79.2914	NA	NA
12SL_100	385.332	26752.5	2.18773	22.3711	16.1176	0.0892364	16.353	0.0144786	2.76477	0.169068		92.666	2.54367	86.7918	13.6042	-71.9203	396.038
12SL_102	237.729	13923.7	1.18479	21.4137	13.3961	0.098818	13.8005	0.0153471	3.31629	0.240302		98.1825	3.23135	95.6847	12.6025	33.8718	322.04
12SL_103	220.845	19421.3	1.6687	20.6408	24.5393	0.094499	24.8338	0.0141466	3.81293	0.153538		90.5559	3.42869	91.6858	21.7747	121.169	585.83
12SL_104	139.439	8899.57	1.76301	27.152	21.2662	0.122235	21.4548	0.0240712	2.83796	0.132276		153.335	4.30023	117.096	23.7326	-568.959	579.572
12SL_105	172.341	17210.7	3.16925	19.5776	11.9919	0.221854	12.1325	0.0315011	1.84192	0.151816		199.936	3.62614	203.452	22.3718	244.386	277.106
Sample 15NB1
15NB1-40	287.585	8107.75	1.34019	21.6484	9.65744	0.0852679	10.1662	0.0133878	3.17577	0.312385		85.7308	2.70459	83.0856	8.11047	7.71509	232.902
15NB1-17	153.175	9586.44	1.60786	21.6719	16.3609	0.0871455	16.5848	0.0136975	2.71606	0.163768		87.7003	2.36586	84.8408	13.4997	5.06261	396.207
15NB1-13	349.092	25022.3	1.74754	20.6972	5.96506	0.0917565	6.60265	0.0137736	2.83073	0.428726		88.1845	2.47927	89.1383	5.6346	114.73	140.822
15NB1-85	441.174	17908	1.1728	20.9931	8.56484	0.0917243	8.68943	0.0139656	1.46622	0.168736		89.4053	1.30183	89.1083	7.41311	81.1381	203.611
15NB1-93	582.988	48690.4	1.6931	20.7064	4.24053	0.0941057	4.46947	0.0141325	1.41213	0.315951		90.4665	1.26859	91.3208	3.90342	113.725	100.078
15NB1-106	603.427	20192.3	1.4346	21.3861	7.01822	0.0916793	7.15673	0.0142201	1.40119	0.195787		91.0229	1.26645	89.0665	6.10275	36.9284	168.164
15NB1-41	173.606	700.934	2.77239	17.4463	16.0052	0.113416	16.4147	0.0143509	3.64368	0.221976		91.8541	3.32314	109.086	16.9794	503.822	354.27
15NB1-18	313.397	15123.6	1.54772	20.0576	8.87975	0.0986888	9.00115	0.0143564	1.47335	0.163685		91.8895	1.34425	95.5653	8.20976	188.278	206.98
15NB1-80	155.651	6430.59	2.05253	21.9915	16.4352	0.0903724	16.5386	0.0144142	1.84581	0.111607		92.2563	1.69075	87.8503	13.9193	-30.2651	400.708
15NB1-1	228.859	9711.57	1.72199	20.2674	9.35287	0.101671	9.45839	0.0149449	1.40885	0.148952		95.6281	1.33731	98.3175	8.86344	164.013	219.022
15NB1-90	925.753	2641.1	1.26299	20.2024	5.10569	0.102165	10.1838	0.0149693	8.81145	0.865242		95.7832	8.3775	98.7725	9.58532	171.519	119.247
15NB1-29	825.997	6005.48	1.9187	20.6928	7.03515	0.0998695	11.5174	0.0149882	9.11904	0.791763		95.9033	8.68074	96.6559	10.6192	115.286	166.118
15NB1-50	197.732	8907.85	1.58441	22.4238	8.88797	0.0922349	9.40384	0.0150004	3.07184	0.326658		95.981	2.92654	89.5832	8.0635	-77.6815	217.783
15NB1-43	999.045	41292.8	1.88798	20.3682	3.91993	0.101653	4.80426	0.0150166	2.77759	0.578153		96.0833	2.64901	98.3008	4.50125	152.449	91.8564
15NB1-69	608.985	54825.8	1.72616	20.8567	2.03807	0.0993625	2.88461	0.0150303	2.04138	0.70768		96.1705	1.94863	96.1877	2.64727	96.5907	48.2237
15NB1-68	342.582	14546.6	1.93976	21.1199	4.52188	0.0981643	4.55988	0.0150364	0.587432	0.128826		96.2095	0.560969	95.0804	4.13877	66.8242	107.654
15NB1-65	140.412	9113.53	1.23395	20.6429	13.4817	0.100591	14.3413	0.0150601	4.89074	0.341024		96.3597	4.67766	97.3216	13.31	120.931	318.885
15NB1-79	353.351	31900.4	2.14134	21.1358	5.27148	0.0988146	5.57487	0.0151474	1.81402	0.325392		96.9145	1.7449	95.6815	5.09055	65.0404	125.588
15NB1-58	395.215	16046.6	2.07894	21.4909	6.73984	0.0972296	7.00822	0.0151549	1.92085	0.274085		96.9617	1.84855	94.2159	6.30586	25.2404	161.838
15NB1-86	258.253	13723.8	1.92281	23.196	14.1214	0.0901223	14.2466	0.0151616	1.88463	0.132286		97.0043	1.81449	87.6173	11.9597	-161.182	352.567
15NB1-95	683.374	54138	1.53846	21.3066	4.45064	0.0981199	4.55868	0.0151625	0.986596	0.216422		97.0101	0.949933	95.0394	4.13598	45.8543	106.397
15NB1-36	371.957	52561.3	2.48076	21.4877	6.01961	0.097386	6.38095	0.0151769	2.11677	0.331733		97.1019	2.04002	94.3606	5.74985	25.6008	144.483
15NB1-76	413.991	20616.2	1.81916	21.4534	6.53306	0.0976262	6.81021	0.0151901	1.92306	0.282379		97.1854	1.85491	94.5828	6.15046	29.4089	156.717
15NB1-55	476.824	23849.5	1.93134	20.7263	4.84374	0.101319	5.01023	0.0152303	1.28088	0.255652		97.4409	1.23871	97.9928	4.68023	111.464	114.391
15NB1-103	694.581	66347.8	2.47773	21.2989	4.22991	0.0988863	5.04404	0.0152753	2.74777	0.544756		97.7267	2.66505	95.7478	4.60887	46.7066	101.1
15NB1-11	432.464	29199.9	2.18367	21.1286	5.94615	0.0997843	6.18843	0.0152908	1.71463	0.277071		97.825	1.66468	96.5772	5.70125	65.8491	141.652
15NB1-38	224.59	10979.8	3.34582	21.4206	15.298	0.0987489	15.5188	0.0153413	2.60857	0.168092		98.1455	2.54081	95.6208	14.1628	33.0873	368.246
15NB1-99	312.313	29893.2	2.20579	21.6681	9.32963	0.0976763	9.59259	0.01535	2.23064	0.232538		98.2005	2.1739	94.6291	8.66744	5.5024	225.047
15NB1-52	125.918	6044.66	1.55493	22.8073	24.9683	0.0929143	25.3402	0.0153694	4.32591	0.170713		98.3236	4.22112	90.2146	21.8778	-119.335	623.988
15NB1-56	364.697	8387.16	2.17708	21.6439	7.91754	0.09799	8.43837	0.0153821	2.91868	0.345881		98.4047	2.8503	94.9193	7.64681	8.16778	190.79
15NB1-102	251.18	48439.3	2.48161	20.693	7.08282	0.102803	7.44434	0.0154286	2.29168	0.307841		98.6998	2.24465	99.3603	7.04645	115.262	167.228
15NB1-91	475.116	23735.6	2.01224	21.139	4.92757	0.100715	5.09027	0.0154411	1.27665	0.250802		98.7793	1.25145	97.4365	4.72927	64.6908	117.371
15NB1-64	210.112	12803.3	2.17657	19.3495	8.03919	0.110048	10.4398	0.0154437	6.66038	0.63798		98.7953	6.52998	106.009	10.5094	271.301	184.553
15NB1-47	486.464	15024.1	1.65372	21.1685	2.68605	0.100626	4.20574	0.0154489	3.23626	0.769486		98.8288	3.17396	97.3539	3.90431	61.352	63.986
15NB1-10	705.11	39326.5	1.77185	21.0399	3.40149	0.101345	4.08435	0.0154648	2.26092	0.553558		98.9294	2.21964	98.0169	3.81621	75.8519	80.8321
15NB1-54	399.465	30036.8	1.95075	19.7728	3.94428	0.107897	4.13413	0.015473	1.23841	0.299557		98.9817	1.21643	104.039	4.08813	221.461	91.2633
15NB1-19	400.852	34453.3	1.96149	21.5648	5.21138	0.0993164	5.55337	0.0155333	1.91869	0.3455		99.3645	1.89188	96.1451	5.09434	16.9791	125.281
15NB1-66	237.619	15272.8	1.67896	21.975	11.3684	0.0975757	11.5325	0.0155514	1.93819	0.168064		99.4793	1.9133	94.5361	10.4106	-28.452	276.243
15NB1-12	274.569	12802.1	1.99604	20.4582	6.041	0.104838	6.2955	0.0155555	1.7719	0.281455		99.5055	1.7496	101.232	6.06576	142.082	141.905
15NB1-32	426.837	28181.4	1.57141	20.7077	5.35096	0.103595	5.57972	0.0155586	1.58132	0.283405		99.5251	1.56173	100.09	5.31834	113.572	126.325
15NB1-61	678.343	69848	1.7767	21.3124	5.20958	0.100796	5.5431	0.0155803	1.89374	0.34164		99.6629	1.87284	97.5113	5.15376	45.1828	124.552
15NB1-2	426.328	21917.6	1.97372	21.0384	4.42226	0.102132	4.59562	0.0155838	1.25034	0.272072		99.685	1.23681	98.7426	4.3242	76.0236	105.098
15NB1-101	505.37	21953.7	2.09257	21.6591	4.00379	0.0993363	4.3786	0.0156044	1.77251	0.404813		99.8157	1.75562	96.1635	4.0174	6.49797	96.4086
15NB1-49	1034.5	48572.1	4.05227	20.7433	2.58889	0.104032	2.99823	0.0156511	1.5123	0.504397		100.112	1.5023	100.492	2.86869	109.532	61.1408
15NB1-81	357.804	24079.1	1.72821	22.2036	4.75918	0.0972168	6.31808	0.0156554	4.15552	0.657719		100.139	4.12915	94.204	5.68419	-53.5888	115.937
15NB1-75	338.006	25579.9	2.81079	21.0343	7.42519	0.10265	8.28248	0.0156598	3.6696	0.443056		100.167	3.64732	99.2192	7.82922	76.4811	176.616
15NB1-3	168.58	6685.02	1.83708	21.7344	11.3881	0.0994324	12.5074	0.0156738	5.17167	0.41349		100.256	5.14481	96.2523	11.4861	-1.83226	275.348
15NB1-27	171.922	14689.2	2.41946	20.2548	11.2689	0.10672	11.8178	0.0156773	3.55985	0.301227		100.278	3.54213	102.96	11.5716	165.471	264.05
15NB1-53	738.882	46580.1	2.16128	20.4982	5.12454	0.106264	5.16908	0.015798	0.677171	0.131004		101.044	0.678909	102.542	5.04168	137.487	120.424
15NB1-33	471.817	15279.9	1.44913	20.2473	6.99897	0.107827	7.52017	0.0158341	2.75087	0.3658		101.273	2.76413	103.976	7.43227	166.337	163.723
15NB1-5	1103.17	11172.8	2.11854	20.5439	3.7546	0.106726	4.97225	0.015902	3.25979	0.655597		101.704	3.28932	102.966	4.86872	132.289	88.2908
15NB1-46	131.901	2092.17	2.8091	26.5727	23.6176	0.0830433	23.7414	0.0160044	2.42048	0.101952		102.354	2.4579	81.0022	18.486	-511.065	637.37
15NB1-92	185.537	9610.5	3.37715	20.0382	9.73484	0.110328	10.1585	0.0160341	2.90312	0.285782		102.542	2.95338	106.266	10.2497	190.579	226.899
15NB1-57	453.776	14694.3	2.46677	20.7402	4.31102	0.107394	4.47271	0.0161545	1.19177	0.266454		103.306	1.22136	103.579	4.40436	109.863	101.81
15NB1-89	78.9111	6909.56	3.22425	20.4626	28.3082	0.108973	28.6468	0.0161725	4.39124	0.153289		103.42	4.5052	105.025	28.5902	141.572	676.344
15NB1-34	888.931	5101.22	2.93731	19.6067	6.17426	0.113798	6.77985	0.0161822	2.80089	0.413119		103.482	2.87527	109.433	7.0337	240.981	142.426
15NB1-59	343.88	14465	2.90984	20.9165	5.16652	0.107052	5.5869	0.0162399	2.12615	0.380559		103.848	2.19027	103.265	5.48571	89.8583	122.515
15NB1-108	538.906	35438.3	2.19708	20.9311	3.8055	0.107086	5.6707	0.0162563	4.20417	0.741384		103.952	4.33528	103.296	5.56956	88.2089	90.2224
15NB1-100	490.151	20170.2	2.24108	19.2943	10.6771	0.116248	10.7811	0.0162672	1.49437	0.13861		104.022	1.54199	111.665	11.4008	277.882	245.08
15NB1-88	490.179	35645.7	2.17183	21.0462	3.59766	0.106589	5.8252	0.0162698	4.58146	0.78649		104.038	4.7282	102.84	5.69731	75.1828	85.4991
15NB1-30	541.083	29786.8	2.62474	20.7415	3.96698	0.108438	4.27081	0.0163125	1.58205	0.370434		104.309	1.63694	104.536	4.24242	109.717	93.7231
15NB1-105	351.547	33458.7	5.60701	20.7128	6.83225	0.108625	6.9779	0.016318	1.41824	0.203248		104.343	1.46793	104.707	6.94234	112.959	161.387
15NB1-23	224.614	11260.9	3.05851	24.1388	11.2922	0.0935532	11.3907	0.0163785	1.49426	0.131183		104.727	1.55225	90.808	9.89491	-261.226	287.112
15NB1-77	395.136	52175.2	2.08275	20.4736	3.69489	0.110867	3.81037	0.0164624	0.93097	0.244325		105.26	0.971979	106.758	3.86134	140.314	86.7575
15NB1-14	378.294	28243.5	2.03978	20.2707	7.63102	0.112008	7.88128	0.0164671	1.97031	0.249999		105.289	2.05768	107.801	8.06078	163.632	178.596
15NB1-74	188.616	10326.6	2.10158	21.0387	9.18268	0.108448	10.2826	0.0165478	4.62712	0.449995		105.801	4.85558	104.545	10.2154	75.9909	218.581
15NB1-25	1485.71	97312.6	1.41944	20.7669	1.8337	0.110108	1.9262	0.016584	0.589732	0.306164		106.031	0.620181	106.064	1.93993	106.846	43.3025
15NB1-60	183.127	11219.2	2.12529	20.5763	10.6252	0.111376	10.7079	0.0166211	1.3276	0.123983		106.266	1.39922	107.224	10.8964	128.577	250.591
15NB1-71	410.094	32300.7	1.88088	20.9774	5.40135	0.10926	5.55916	0.0166231	1.31517	0.236576		106.279	1.38628	105.288	5.55996	82.9147	128.233
15NB1-107	435.991	26449.9	2.05785	21.0707	5.88474	0.109032	6.09328	0.0166622	1.58045	0.259376		106.526	1.66976	105.08	6.08269	72.3986	140.009
15NB1-6	401.913	27338.1	3.13802	21.2063	4.35325	0.108821	4.81629	0.016737	2.06055	0.42783		107.001	2.18661	104.886	4.79951	57.0955	103.835
15NB1-67	240.932	11412.2	1.96863	21.1654	10.4525	0.109124	10.6666	0.0167512	2.12627	0.19934		107.091	2.25823	105.164	10.6564	61.7346	249.585
15NB1-7	753.799	44523.3	3.03186	20.5195	2.36618	0.11356	2.63659	0.0169002	1.16312	0.441143		108.036	1.24611	109.217	2.73016	135.059	55.6386
15NB1-94	263.242	30650.9	1.40575	20.4521	4.28273	0.114347	4.69255	0.0169614	1.91789	0.408709		108.423	2.06205	109.934	4.8893	142.802	100.535
15NB1-82	480.863	14753.1	2.32764	19.588	11.0831	0.123236	12.9411	0.0175076	6.68123	0.516279		111.884	7.41077	118.001	14.4178	243.185	256.023
15NB1-63	860.987	67900.1	2.27994	20.6474	3.13443	0.119369	3.22832	0.0178754	0.77292	0.239418		114.215	0.875013	114.5	3.49565	120.416	73.8807
15NB1-37	585.02	42998.5	1.57907	20.5344	6.06606	0.120235	6.28475	0.0179065	1.64346	0.261499		114.412	1.86372	115.285	6.84931	133.373	142.718
15NB1-35	931.935	63788	3.12866	20.5213	2.04819	0.12307	2.64061	0.018317	1.66666	0.631165		117.011	1.93258	117.851	2.93819	134.854	48.1186
15NB1-21	252.526	15299.4	1.70456	19.9822	7.48013	0.127521	8.20072	0.0184809	3.36146	0.409898		118.048	3.93202	121.867	9.41782	197.077	174.011
15NB1-110	118.076	7593.18	2.70035	24.5068	22.8548	0.104114	23.177	0.0185052	3.85137	0.166172		118.202	4.51091	100.567	22.1948	-299.746	590.46
15NB1-48	265.028	15315.1	1.25381	20.2889	7.76152	0.127263	7.83913	0.0187266	1.10034	0.140366		119.603	1.30391	121.635	8.98638	161.552	181.75
15NB1-78	1119.87	41847.7	2.12915	20.1941	1.96457	0.128217	3.79212	0.0187789	3.24356	0.85534		119.934	3.85416	122.494	4.37591	172.472	45.8503
15NB1-87	2167.67	161115	1.95494	20.5761	0.52478	0.126721	0.787274	0.0189108	0.586862	0.745435		120.768	0.702146	121.147	0.899058	128.606	12.3669
15NB1-22	117.918	14875.9	2.02905	21.3221	12.083	0.127109	12.4567	0.0196566	3.02799	0.243082		125.485	3.76293	121.497	14.265	44.1263	289.719
15NB1-39	151.266	11461.8	2.18381	21.4809	15.9511	0.132888	16.118	0.0207032	2.31361	0.143542		132.099	3.02515	126.69	19.1996	26.364	384.625
15NB1-4	402.012	20984.5	1.30571	19.7469	8.92065	0.145028	10.813	0.0207706	6.11084	0.56514		132.524	8.01569	137.512	13.9071	224.53	206.569
15NB1-72	108.467	16156.9	3.22376	24.1018	26.9403	0.134566	27.0638	0.0235225	2.58234	0.0954168		149.88	3.82575	128.192	32.604	-257.341	693.204
15NB1-15	84.5052	8662.82	2.52921	23.3367	25.7703	0.152724	26.0282	0.0258491	3.65531	0.140436		164.517	5.93752	144.314	35.0291	-176.238	651.747
15NB1-83	555.088	79922.5	0.881169	20.14	3.69713	0.18503	3.75447	0.0270272	0.653645	0.174098		171.915	1.10887	172.38	5.95246	178.731	86.2393
15NB1-70	68.7564	7341.53	3.34415	18.916	21.8076	0.202631	21.913	0.0277993	2.14659	0.0979596		176.76	3.74276	187.35	37.5062	323.047	500.564
15NB1-62	82.4146	18557.9	1.79273	18.9738	8.18007	0.253012	8.73546	0.0348173	3.06508	0.350878		220.628	6.64801	229.02	17.9121	316.061	186.297
15NB1-96	248.64	156558	2.04765	13.5098	0.485214	1.76011	0.920402	0.17246	0.782117	0.849756		1025.65	7.41617	1030.89	5.95972	1042	9.81043
15NB1-28	440.423	181638	3.07612	13.4973	0.461852	1.80597	0.863792	0.176789	0.729952	0.845055		1049.41	7.06919	1047.62	5.6451	1043.88	9.33622
15NB1-97	363.158	46766.7	1.48439	13.3289	0.658329	1.8733	4.01169	0.181092	3.95731	0.986443		1072.94	39.1147	1071.7	26.5633	1069.18	13.2247
15NB1-8	53.3952	30380.3	2.49903	13.0249	3.28373	2.06616	3.38731	0.195181	0.831248	0.245401		1149.38	8.7509	1137.66	23.1808	1115.36	65.5576
15NB1-84	54.7332	52269.8	2.06126	12.7794	3.26953	2.22735	3.85708	0.206442	2.04627	0.530523		1209.83	22.5722	1189.69	27.0354	1153.24	64.9299
15NB1-98	71.5021	35716.7	1.48085	12.3014	1.33483	1.93096	3.52335	0.172277	3.26071	0.925457		1024.64	30.8909	1091.87	23.5737	1228.49	26.1892
15NB1-104	116.144	97144	1.97971	12.1707	1.16681	2.42667	1.66396	0.214203	1.18631	0.71294		1251.17	13.4912	1250.53	11.9655	1249.45	22.8398
15NB1-73	114.789	139119	1.02871	11.4033	0.79217	2.87937	5.52177	0.238136	5.46465	0.989656		1377	67.7569	1376.53	41.6378	1375.78	15.2333
15NB1-26	175.168	33794.3	1.39329	11.0347	0.544678	2.98049	2.52218	0.238531	2.46266	0.976403		1379.06	30.5749	1402.65	19.1782	1438.68	10.3839
15NB1-109	108.603	132592	1.83529	10.8826	0.903966	3.21168	1.07952	0.253492	0.590099	0.546629		1456.46	7.69284	1459.98	8.35889	1465.09	17.1724
15NB1-20	79.0881	90943.8	0.977039	9.68554	1.04745	3.32015	3.52831	0.233227	3.36925	0.954918		1351.39	41.0765	1485.8	27.5399	1683.27	19.3386
15NB1-16	49.4026	128673	0.60297	5.4262	0.29653	13.033	1.14614	0.512908	1.10712	0.965952		2669.03	24.1958	2682.05	10.8088	2691.85	4.89723
Sample LP19
LP19-94	252.905	8561.11	1.62094	22.8552	17.8528	0.0845685	18.6745	0.0140182	5.47862	0.293374		89.7396	4.88243	82.431	14.7864	-124.511	443.703
LP19-100	490.759	15611.2	1.9404	21.0954	7.06689	0.0928341	7.96999	0.0142034	3.6851	0.462371		90.9171	3.32687	90.14	6.87461	69.5911	168.294
LP19-41	384.983	19185.9	3.33841	21.1631	8.90097	0.0930234	9.12591	0.0142781	2.01372	0.220659		91.3918	1.82739	90.3159	7.88638	61.9707	212.409
LP19-64	444.487	12238.2	1.7614	19.8702	6.43093	0.100798	10.2802	0.0145261	8.02039	0.780175		92.9679	7.40288	97.5124	9.55849	210.135	149.2
LP19-96	360.257	8692.2	2.77011	19.9459	7.24723	0.100751	7.40244	0.0145749	1.50792	0.203705		93.2774	1.39642	97.4698	6.87977	201.305	168.45
LP19-98	2482.01	23236.8	3.38449	20.2653	3.12215	0.0999225	3.47712	0.0146864	1.53053	0.440172		93.9863	1.42805	96.7048	3.20739	164.25	72.9987
LP19-97	312.227	8166.71	2.52708	24.1895	14.6412	0.0837576	14.8522	0.0146943	2.49508	0.167993		94.0364	2.32925	81.6716	11.6556	-266.546	373.341
LP19-84	89.7488	6814.18	3.43435	20.9002	40.4568	0.0971674	44.1602	0.0147289	17.7023	0.400866		94.2558	16.5641	94.1582	39.731	91.6994	995.143
LP19-33	300.713	9287.79	1.85597	20.7001	10.6054	0.0989389	11.5515	0.0148538	4.57853	0.396357		95.0496	4.31995	95.7964	10.5604	114.405	250.777
LP19-82	302.126	11531.6	2.25319	21.3823	9.49044	0.0960254	9.79402	0.0148915	2.41959	0.247048		95.2891	2.28865	93.1008	8.71299	37.359	227.557
LP19-37	368.039	10612.6	1.64767	22.5726	14.2477	0.091206	14.8807	0.0149315	4.29395	0.288559		95.5433	4.07233	88.6262	12.6296	-93.8859	351.131
LP19-85	180.459	6682.76	1.88064	19.3386	14.0212	0.106685	14.361	0.0149632	3.1054	0.216239		95.7445	2.95128	102.928	14.0579	272.593	322.708
LP19-68	156.605	9476.46	3.35919	20.4572	17.6264	0.101588	18.9837	0.0150727	7.04936	0.371336		96.4397	6.74778	98.2416	17.7779	142.173	416.484
LP19-78	169.703	6917.37	1.66504	20.489	22.598	0.103006	22.8186	0.0153068	3.16517	0.13871		97.9261	3.07611	99.5476	21.6406	138.557	536.682
LP19-77	322.851	15391.1	2.66513	19.7866	12.2814	0.107739	12.7701	0.0154611	3.49901	0.273999		98.906	3.43431	103.895	12.6119	219.877	285.081
LP19-65	479.39	9249.04	2.06607	20.2383	6.85561	0.105444	7.24188	0.0154773	2.33354	0.322228		99.0089	2.29276	101.789	7.01413	167.367	160.342
LP19-62	288.487	5498.27	1.78806	24.2906	15.5508	0.0882705	15.863	0.0155508	3.13174	0.197424		99.4755	3.0914	85.891	13.0653	-277.153	397.607
LP19-54	232.286	9785.57	2.9975	21.7981	13.3077	0.0995587	13.7534	0.0157397	3.47312	0.252528		100.674	3.46938	96.3689	12.6451	-8.89656	322.5
LP19-21	146.631	6727.75	2.63103	22.0199	26.067	0.100117	26.4414	0.015989	4.43365	0.167678		102.256	4.49792	96.8844	24.4381	-33.3934	641.641
LP19-86	3327.86	50840.9	3.04099	20.5689	1.23682	0.10767	7.56527	0.0160622	7.46348	0.986545		102.721	7.60581	103.832	7.46703	129.393	29.0934
LP19-51	69.6963	5267.3	2.25184	23.7152	44.2028	0.0945171	45.386	0.0162568	10.2958	0.226851		103.956	10.6173	91.7026	39.8164	-216.522	1161
LP19-43	261.943	13730	2.30205	19.8688	14.1348	0.115829	14.753	0.0166913	4.22617	0.286461		106.711	4.47265	111.284	15.5513	210.277	329.049
LP19-29	1111.94	77982.3	3.77949	20.7248	3.32717	0.112362	3.49409	0.0168892	1.06704	0.305384		107.966	1.14244	108.124	3.58376	111.584	78.555
LP19-7	108.109	13940.4	3.92442	27.0517	71.5013	0.0861643	71.5656	0.0169052	3.03333	0.0423854		108.067	3.25072	83.924	57.7077	-558.975	2206.9
LP19-76	704.26	64864.8	2.78722	19.9058	9.99415	0.118155	10.1028	0.0170581	1.47741	0.146238		109.036	1.59737	113.398	10.8402	205.944	232.315
LP19-34	110.958	8630.9	2.81889	23.2982	35.933	0.101331	36.127	0.0171224	3.7389	0.103493		109.444	4.05745	98.0043	33.7634	-172.129	920.976
LP19-58	219.387	11744.8	1.81169	18.5775	11.8037	0.13065	12.0356	0.0176034	2.35135	0.195365		112.492	2.62212	124.682	14.1224	363.859	267.001
LP19-28	59.0312	4139.36	1.98456	14.8935	100.256	0.16328	100.715	0.0176371	9.60736	0.0953914		112.705	10.7339	153.57	144.508	842.25	414.819
LP19-44	266.137	8910.3	1.80733	20.0549	9.97398	0.121282	10.3173	0.0176407	2.63933	0.255816		112.728	2.9494	116.234	11.3317	188.589	232.579
LP19-13	98.8949	4782.88	4.32373	22.3716	18.0635	0.111187	18.5944	0.0180405	4.41127	0.237237		115.26	5.03925	107.05	18.8942	-71.9762	444.468
LP19-18	261.083	12120.7	5.93429	19.5635	6.41969	0.130151	6.94972	0.0184669	2.66198	0.383034		117.959	3.1115	124.234	8.12677	246.033	147.949
LP19-74	149.347	19273.6	2.87852	20.906	24.4559	0.124693	25.9646	0.0189065	8.72174	0.335909		120.741	10.4327	119.318	29.2374	91.0396	587.042
LP19-45	233.373	30479	2.42299	20.5289	22.8766	0.130842	23.0887	0.0194811	3.12221	0.135227		124.376	3.84605	124.854	27.1318	133.977	543.898
LP19-25	86.0886	6275.7	1.94001	22.1916	26.6553	0.122889	27.2172	0.0197788	5.50188	0.202147		126.258	6.87895	117.687	30.2536	-52.272	658.923
LP19-75	262.11	17306.2	1.72554	20.8791	9.45277	0.131914	10.2177	0.0199757	3.87901	0.379636		127.502	4.89724	125.816	12.0915	94.0715	224.266
LP19-56	67.7947	4561.69	3.70252	11.3046	181.128	0.252087	181.371	0.0206684	9.40008	0.0518278		131.879	12.2708	228.27	388.718	1392.46	507.338
LP19-47	250.895	5888.38	3.06121	21.7293	12.4189	0.134371	12.802	0.0211764	3.10858	0.24282		135.087	4.15559	128.018	15.399	-1.27252	300.391
LP19-20	133.64	7817.31	3.5925	20.7384	24.3245	0.142466	24.6332	0.0214282	3.88796	0.157834		136.676	5.25797	135.238	31.2001	110.059	581.774
LP19-60	416.239	50644	5.1313	20.745	5.15054	0.145887	5.53451	0.0219497	2.02552	0.36598		139.966	2.80449	138.274	7.15471	109.317	121.671
LP19-88	135.119	8036.5	2.81828	21.3084	17.9176	0.142448	18.8874	0.0220145	5.97438	0.316315		140.375	8.29588	135.222	23.9169	45.6694	431.102
LP19-38	109.272	6783.45	2.85295	20.8507	33.1465	0.146523	33.4363	0.0221578	4.39236	0.131365		141.279	6.13797	138.837	43.4145	97.2696	803.951
LP19-8	155.691	9710.79	3.25607	23.4902	13.8385	0.133596	14.1139	0.0227604	2.77446	0.196576		145.078	3.98018	127.324	16.8909	-192.618	347.58
LP19-16	204.954	16008.1	2.15718	20.9015	9.74954	0.15108	10.0437	0.0229025	2.41281	0.240232		145.974	3.48249	142.865	13.3859	91.5117	231.437
LP19-19	48.3083	1717.17	3.58184	19.3592	24.0604	0.165149	25.4699	0.0231879	8.35516	0.328041		147.772	12.2062	155.2	36.6724	270.152	558.82
LP19-99	435.617	38239.6	2.65542	21.0406	5.24746	0.153272	5.47342	0.0233893	1.55646	0.284366		149.041	2.29315	144.797	7.3863	75.7795	124.751
LP19-35	218.08	14554.2	3.48847	20.3947	9.46798	0.158172	9.81299	0.0233963	2.57917	0.262832		149.085	3.80103	149.102	13.6086	149.383	222.328
LP19-87	58.5168	5040.58	4.18625	23.4436	40.0251	0.138177	40.8432	0.0234942	8.13355	0.199141		149.701	12.0358	131.419	50.3886	-187.656	1036.52
LP19-79	154.681	9134.04	2.64483	19.1971	12.1627	0.169457	12.6112	0.0235935	3.33344	0.264324		150.327	4.95309	158.948	18.5571	289.417	278.805
LP19-11	84.5963	5728.3	4.75562	20.1445	16.1595	0.161699	17.0713	0.0236246	5.50434	0.322433		150.523	8.1893	152.189	24.1319	178.207	378.884
LP19-70	117.777	16008.3	1.93251	19.0439	16.3696	0.171167	19.6412	0.0236415	10.8541	0.552622		150.629	16.16	160.432	29.1554	307.691	375.001
LP19-10	138.773	5781.69	3.31853	21.2865	19.9456	0.154135	20.4589	0.023796	4.55416	0.2226		151.602	6.82365	145.556	27.7501	48.1317	480.478
LP19-39	119.307	6935.33	1.49222	25.9259	21.9133	0.127122	22.3442	0.023903	4.36706	0.195445		152.276	6.57206	121.508	25.5938	-445.752	582.537
LP19-50	344.607	18281.9	2.25505	19.831	6.29507	0.166765	6.58412	0.0239855	1.92946	0.293048		152.795	2.91346	156.607	9.55569	214.686	145.921
LP19-5	107.172	7282.32	2.37187	23.0554	21.8	0.144281	22.1619	0.0241257	3.98848	0.17997		153.678	6.05693	136.85	28.3809	-146.087	545.874
LP19-55	86.8613	4088.58	3.12707	23.1038	28.2002	0.145959	29.1758	0.0244575	7.48152	0.256429		155.766	11.514	138.338	37.7497	-151.287	711.809
LP19-27	73.5382	3311.73	1.80552	26.3355	40.3858	0.129051	40.8496	0.0246491	6.13797	0.150258		156.972	9.51852	123.244	47.4439	-487.198	1110.45
LP19-26	147.077	11653.1	2.45862	23.1825	15.5564	0.146671	15.8791	0.0246605	3.18452	0.200548		157.043	4.94065	138.968	20.6262	-159.729	388.655
LP19-6	81.4157	15264.4	1.89273	18.9742	19.9642	0.180689	20.7996	0.0248653	5.83534	0.280551		158.332	9.12665	168.654	32.3316	316.02	458.016
LP19-92	275.801	28176.9	2.25031	20.64	9.3972	0.166135	9.77116	0.0248696	2.67736	0.274006		158.358	4.18817	156.059	14.1356	121.278	221.829
LP19-4	74.2996	7775.63	2.53602	24.0841	48.1949	0.143394	48.5888	0.0250472	6.17441	0.127075		159.476	9.7259	136.062	61.9498	-255.474	1287.38
LP19-24	190.571	13855.7	5.95943	23.1101	20.1004	0.149769	20.3194	0.0251027	2.97567	0.146444		159.825	4.69739	141.708	26.8815	-151.962	503.121
LP19-14	398.488	34768	2.11451	20.7487	4.481	0.168138	5.41482	0.0253021	3.03987	0.561399		161.078	4.83591	157.802	7.91396	108.875	105.863
LP19-46	113.089	9581.84	2.51418	23.2337	19.2877	0.150246	19.6858	0.0253175	3.93928	0.200108		161.175	6.27043	142.129	26.1151	-165.224	483.718
LP19-71	282.175	13569.1	2.86364	19.8262	9.22746	0.176991	9.43721	0.02545	1.97866	0.209665		162.009	3.16565	165.468	14.4106	215.27	214.077
LP19-1	335.953	29229.4	2.3443	19.5181	6.56149	0.180411	6.80073	0.0255388	1.78795	0.262905		162.567	2.87026	168.415	10.5544	251.414	151.082
LP19-30	201.463	10283.9	1.83271	20.3234	9.90189	0.175468	10.6015	0.0258638	3.78738	0.357249		164.609	6.15544	164.153	16.0701	157.589	232.208
LP19-49	221.066	11666.6	2.62251	20.0141	12.4454	0.181703	12.9389	0.0263754	3.53925	0.273536		167.823	5.86303	169.525	20.2041	193.372	290.324
LP19-90	304.492	23447.2	1.32412	21.5032	7.54007	0.169237	8.20127	0.0263935	3.22618	0.393376		167.937	5.34799	158.757	12.0538	23.8632	181.129
LP19-22	441.432	59413.9	2.66068	21.0188	7.07496	0.174581	8.82677	0.0266136	5.27795	0.597948		169.319	8.82026	163.387	13.322	78.2322	168.2
LP19-57	100.43	8431.99	1.9347	20.8691	18.6063	0.176725	19.0051	0.0267486	3.87276	0.203775		170.167	6.50393	165.239	28.9895	95.1903	443.796
LP19-80	224.565	9355.44	2.3378	22.3181	9.21881	0.165528	9.33183	0.0267933	1.44797	0.155165		170.447	2.43569	155.53	13.4577	-66.1262	225.416
LP19-63	1050.33	65537.7	2.36999	20.0677	2.39671	0.184101	2.83647	0.0267949	1.51702	0.534827		170.458	2.55199	171.583	4.47794	187.108	55.8051
LP19-23	142.927	18419.3	3.40161	21.4918	12.6819	0.172845	13.1919	0.0269419	3.6328	0.27538		171.38	6.14386	161.885	19.7428	25.1124	305.271
LP19-67	625.252	67999.2	2.86369	20.2472	2.64067	0.188662	2.90149	0.0277043	1.20229	0.414371		176.164	2.08934	175.487	4.67606	166.343	61.725
LP19-15	99.0548	4337.28	2.29621	24.1628	28.3763	0.159186	28.5255	0.0278965	2.91405	0.102156		177.37	5.09818	149.99	39.7958	-263.746	732.325
LP19-52	901.549	60470.3	2.0007	20.2559	3.4409	0.19056	4.01355	0.027995	2.06611	0.514784		177.988	3.62712	177.107	6.52297	165.342	80.4132
LP19-12	525.697	40939.8	1.77863	20.1666	4.62695	0.193668	4.76928	0.0283263	1.15641	0.242471		180.065	2.05347	179.754	7.85716	175.651	107.983
LP19-48	650.721	45688.4	2.37766	20.0704	2.5096	0.197082	2.82821	0.0286881	1.3041	0.461105		182.332	2.34449	182.654	4.72789	186.793	58.4135
LP19-53	262.846	23976.9	2.62403	20.89	7.13066	0.191367	7.3808	0.0289938	1.90523	0.258133		184.248	3.46064	177.795	12.0386	92.8403	169.077
LP19-73	226.771	20024.6	1.41268	20.1462	7.19136	0.198774	7.36601	0.0290436	1.59451	0.216468		184.56	2.90109	184.088	12.4024	178.013	167.865
LP19-91	1110.43	41345.5	15.1278	20.1558	3.01197	0.198988	3.33765	0.0290887	1.43805	0.430857		184.842	2.62038	184.27	5.62455	176.909	70.2355
LP19-3	158.559	21461.4	2.52158	21.1719	10.8653	0.192455	11.2146	0.0295521	2.77719	0.247641		187.744	5.13882	178.722	18.3801	60.9848	259.548
LP19-59	192.738	14778.1	2.58755	19.782	9.08625	0.211402	10.2415	0.0303304	4.72521	0.46138		192.616	8.96688	194.729	18.1493	220.418	210.582
LP19-9	245.889	16997.4	3.83557	19.8452	9.01167	0.211367	9.13389	0.0304223	1.48917	0.163038		193.191	2.83426	194.699	16.1839	213.002	209.136
LP19-42	364.932	32862.6	7.57973	19.1873	6.89533	0.219881	7.18361	0.0305985	2.01463	0.280448		194.293	3.85589	201.811	13.1483	290.563	157.681
LP19-81	410.638	22474	2.24908	20.0732	4.19439	0.211257	4.40694	0.0307558	1.35211	0.306814		195.277	2.60077	194.607	7.8046	186.47	97.6727
LP19-95	647.462	26113.6	3.32629	19.4922	3.63121	0.220232	6.50659	0.0311343	5.39907	0.829786		197.644	10.509	202.103	11.9245	254.427	83.5204
LP19-17	358.936	30103.1	2.68488	20.0118	4.24947	0.215155	4.45167	0.0312275	1.32641	0.297959		198.226	2.58928	197.869	8.00353	193.642	98.8558
LP19-31	111.056	16472	5.093	21.1049	18.4538	0.212083	18.595	0.032463	2.2874	0.123011		205.945	4.63633	195.299	33.0487	68.5169	442.314
LP19-69	418.52	31188.2	3.55832	20.1283	6.28865	0.223994	6.7582	0.0326996	2.47512	0.366239		207.422	5.05222	205.229	12.5586	180.089	146.702
LP19-32	309.284	23333.2	4.3466	20.5083	4.96026	0.22999	5.57625	0.0342088	2.54762	0.456871		216.836	5.43229	210.19	10.5875	136.316	116.609
LP19-93	176.669	19354.4	2.33677	18.6681	9.77216	0.296207	10.1791	0.0401046	2.84937	0.279924		253.481	7.08246	263.433	23.6232	352.922	221.254
LP19-72	591.695	82398.4	2.53996	18.7371	1.04577	0.413431	1.74736	0.0561828	1.39987	0.801135		352.369	4.80033	351.343	5.18973	344.588	23.6407
LP19-88	103.933	45427.6	0.45575	20.3525	13.306	0.394476	13.591	0.0582288	2.76865	0.203712		364.845	9.82075	337.634	39.0576	154.205	312.772
LP19-83	29.0799	13144.8	3.64823	14.0052	9.87865	1.55713	10.1351	0.158165	2.26531	0.223512		946.572	19.9428	953.327	62.7452	968.935	202.061
LP19-2	138.242	136418	4.2091	12.6726	1.5233	2.10082	2.34345	0.193087	1.78082	0.759913		1138.08	18.5789	1149.08	16.1226	1169.87	30.1486
LP19-66	32.0903	2269.94	3.90116	8.58985	150.766	0.390203	151.017	0.0243095	8.68912	0.0575376		154.834	13.2935	334.518	459.365	1901.9	9.85624
M4D308B-12	459.099	21092.7	1.44552	18.8191	9.13238	0.115895	9.37276	0.0158184	2.1091	0.225024		101.174	2.11719	111.343	9.88442	334.691	207.35
M4D308B-9	454.369	19972.3	2.93843	20.0323	4.0384	0.111151	5.24135	0.0161489	3.34113	0.637455		103.271	3.42293	107.018	5.32375	191.259	93.9741
M4D308B-7	414.895	8900.94	2.22147	19.9141	12.7205	0.11216	13.2135	0.0161994	3.5755	0.270595		103.591	3.6743	107.94	13.5314	205.008	296.155
M4D308B-14	561.129	35856.5	2.31669	20.9517	6.99977	0.106615	7.36155	0.0162008	2.2794	0.309636		103.6	2.34259	102.865	7.20161	85.8753	166.19
M4D308B-19	545.081	20505.1	2.26317	20.6566	5.28226	0.108218	5.62349	0.0162127	1.92907	0.343039		103.676	1.98399	104.334	5.57587	119.405	124.576
M4D308B-6	296.518	11884	3.47105	23.2067	11.941	0.104364	12.2819	0.0175656	2.87349	0.233962		112.252	3.19764	100.797	11.7856	-162.329	297.839
M4D308B-3	327.143	16332.1	1.54465	22.475	21.5583	0.128195	22.2718	0.0208964	5.59224	0.251091		133.319	7.37893	122.475	25.7019	-83.2607	533.198
M4D308B-18	173.271	14867.2	3.33736	20.6807	10.4456	0.145488	10.9672	0.0218219	3.3419	0.304718		139.16	4.60075	137.921	14.1446	116.632	246.878
M4D308B-17	151.117	10779.6	2.09737	25.0583	18.9702	0.12315	19.1405	0.0223813	2.54767	0.133103		142.688	3.59529	117.924	21.313	-356.952	494.059
M4D308B-14	357.19	26446.8	2.6713	20.0807	7.027	0.160949	7.32494	0.0234404	2.06782	0.282299		149.363	3.05305	151.534	10.3116	185.608	163.8
M4D308B-2	275.193	18960	2.9423	21.3257	10.3134	0.157406	10.6021	0.0243458	2.45756	0.231798		155.063	3.76529	148.43	14.6416	43.7173	247.091
M4D308B-20	369.321	21801.3	6.20071	20.8302	6.40355	0.165652	6.84608	0.0250259	2.42143	0.353696		159.341	3.81105	155.638	9.87899	99.617	151.606
M4D308B-10	382.689	27932.6	1.69924	20.4685	8.36184	0.169981	8.60361	0.0252339	2.02526	0.235396		160.65	3.21337	159.402	12.6927	140.926	196.589
M4D308B-1	208.426	24897.6	2.34221	21.9055	14.8124	0.160778	14.9891	0.0255434	2.29485	0.153101		162.595	3.68466	151.384	21.0836	-20.7815	360.099
M4D308B-16	160.438	10349.3	2.26357	21.1923	11.1542	0.167052	11.4064	0.025676	2.38511	0.209104		163.429	3.84897	156.857	16.5797	58.7242	266.578
M4D308B-4	141.728	14277.6	2.49134	21.9401	18.4076	0.161436	19.0167	0.0256883	4.77413	0.25105		163.506	7.70785	151.959	26.8454	-24.5939	448.979
M4D308B-11	194.042	13815.6	2.61575	22.8296	13.4227	0.162519	13.5872	0.0269091	2.10789	0.155138		171.175	3.5607	152.905	19.2893	-121.74	332.447
M4D308B-5	632.777	154383	1.74958	18.5623	0.886508	0.435915	1.43173	0.0586855	1.12425	0.785242		367.627	4.01741	367.368	4.41332	365.712	19.967
M4D308B-13	344.248	129841	1.02873	17.0649	2.57885	0.670347	2.99971	0.0829665	1.53227	0.510804		513.805	7.56729	520.923	12.2243	552.277	56.2807
M4D308B-8	125.758	83389.1	2.00812	10.9971	0.908162	3.21725	1.83618	0.256603	1.59587	0.869125		1472.44	21.0078	1461.32	14.2243	1445.18	17.2984
Sample 08QH1b
08QH1B-1	134.991	46732.2	2.48542	9.11646	2.4922	4.07983	3.98524	0.269753	3.10983	0.780338		1539.55	42.5901	1650.28	32.5106	1794.28	45.3811
08QH1B-2	168.45	1745.15	1.67709	23.1403	68.8605	0.103736	71.6379	0.0174099	19.754	0.275748		111.266	21.791	100.219	68.4692	-155.205	1944.46
08QH1B-3	377.341	3516.94	1.79273	32.0733	116.844	0.0561605	117.01	0.0130639	6.23622	0.0532964		83.67	5.18413	55.4807	63.2581	-1042.04	0
08QH1B-4	414.17	5889.34	2.34406	21.3803	15.2169	0.15736	15.9356	0.024401	4.73185	0.296935		155.41	7.26585	148.39	22.0035	37.5757	365.965
08QH1B-5	1565.91	19151.9	2.7587	20.9069	7.22697	0.152736	8.95941	0.0231595	5.29546	0.591051		147.593	7.72694	144.325	12.0543	90.9249	171.433
08QH1B-7	508.222	4099.17	2.43222	22.3473	16.3643	0.0936649	17.1897	0.015181	5.26254	0.306145		97.1278	5.07308	90.9117	14.9493	-69.3242	401.964
08QH1B-8	949.821	4805.44	2.04755	24.7463	21.7883	0.0836732	23.7476	0.0150174	9.44566	0.397752		96.089	9.00894	81.5925	18.6203	-324.669	565.128
08QH1B-9	431.223	2818.17	5.13929	24.0035	40.0161	0.073039	42.2124	0.0127154	13.4387	0.31836		81.4518	10.8772	71.5792	29.1829	-246.997	1048.22
08QH1B-11	319.256	5628.71	2.46609	23.0482	25.6102	0.158594	26.652	0.0265107	7.37886	0.276859		168.673	12.2847	149.471	37.0602	-145.307	643.714
08QH1B-12	368.179	5179.2	2.23199	17.23	14.3952	0.141034	16.7391	0.017624	8.54266	0.510341		112.622	9.53739	133.964	21.0111	531.233	316.769
08QH1B-13	412.753	5831.94	2.5122	22.3804	15.4261	0.148615	16.3811	0.024123	5.51167	0.336464		153.661	8.36914	140.689	21.5243	-72.9447	378.946
08QH1B-15	545.372	8263.48	6.31343	20.1987	8.54894	0.19896	9.51442	0.0291466	4.1761	0.438923		185.205	7.6243	184.246	16.0328	171.943	199.84
08QH1B-16	445.737	7457.64	1.88269	23.8592	24.4533	0.135162	26.6883	0.0233889	10.6912	0.400594		149.039	15.7512	128.726	32.2771	-231.765	624.299
08QH1B-18	396.786	14452.9	1.71571	21.5767	28.5171	0.155643	32.2516	0.0243564	15.0647	0.467099		155.13	23.0911	146.882	44.1328	15.6866	697.573
08QH1B-21	363.357	5285.72	1.88163	20.0043	18.3412	0.176832	19.5731	0.0256557	6.83421	0.349163		163.301	11.0202	165.331	29.8719	194.521	429.49
08QH1B-23	188.657	51306.6	2.33417	7.79012	1.28557	6.01259	3.13518	0.339707	2.85949	0.912064		1885.26	46.7421	1977.67	27.3011	2075.72	22.6408
08QH1B-24	715.905	18383.1	2.20127	20.4668	12.089	0.169894	12.7188	0.0252189	3.95281	0.310784		160.555	6.26806	159.327	18.7567	141.084	284.659
08QH1B-25	135.254	1483.11	2.22385	20.2967	28.1069	0.165943	29.1502	0.0244278	7.72863	0.265132		155.579	11.8802	155.892	42.1505	160.651	669.037
08QH1B-26	340.526	2904.39	1.3396	15.661	35.0332	0.124388	38.3155	0.0141285	15.5163	0.404961		90.4409	13.9351	119.043	43.0654	736.787	764.04
08QH1B-27	251.715	4121.11	2.08227	-12.5051	512.102	-0.145863	512.178	0.0132291	8.83215	0.0172443		84.7208	7.43371	-160.089	-1373.36	0	1385.23
08QH1B-28	197.284	4569.1	1.26465	19.8884	44.5613	0.146477	45.1614	0.0211285	7.33757	0.162474		134.784	9.78722	138.797	58.6523	207.963	1083.14
08QH1B-29	537.717	117113	1.93875	9.66473	1.39216	4.03387	5.80861	0.282755	5.63932	0.970854		1605.22	80.1371	1641.05	47.2973	1687.24	25.6872
08QH1B-31	218.675	2669.86	1.35964	36.8308	108.274	0.0542191	109.36	0.0144831	15.3795	0.140632		92.6944	14.154	53.6125	57.1702	-1476.73	0
08QH1B-32	282.911	2986.27	5.23813	20.0253	43.4047	0.111432	45.7675	0.016184	14.5154	0.317155		103.494	14.9026	107.274	46.6249	192.077	1055.19
08QH1B-33	177.225	1337.75	11.2652	39.7029	86.3738	0.0364794	88.0064	0.0105043	16.8729	0.191723		67.3621	11.3068	36.381	31.4608	-1732.58	1348.4
08QH1B-34	234.557	1932.81	3.28029	24.4126	76.9131	0.0805675	78.1023	0.014265	13.577	0.173836		91.3087	12.3096	78.6784	59.1961	-289.916	2334.16
08QH1B-36	1025.17	7369.9	36.7987	19.4538	13.9156	0.0930338	14.8822	0.0131263	5.27599	0.354518		84.0671	4.40658	90.3255	12.8625	258.997	321.063
08QH1B-38	216.007	3348.82	2.46426	14.8763	29.1856	0.259489	29.6391	0.0279971	5.16504	0.174265		178.001	9.06805	234.255	62.0812	844.633	619.827
08QH1B-39	134.539	1211.76	1.44057	-1.10301	1640.22	-1.98318	1640.34	0.0158649	19.0674	0.0116241		101.469	19.1961	#NUM!	#NUM!	0	280.994
08QH1B-40	475.969	5235.39	2.76401	19.1574	33.6547	0.0911009	34.3396	0.0126578	6.82419	0.198726		81.0853	5.49876	88.5284	29.1207	294.144	788.538
08QH1B-41	391.431	4255.39	2.07989	14.5535	32.7211	0.127969	35.7201	0.0135074	14.3267	0.401083		86.4916	12.3087	122.271	41.1708	890.083	693.928
08QH1B-42	472.257	3200.62	2.71258	15.509	151.837	0.117224	151.936	0.0131855	5.47374	0.0360267		84.4437	4.59209	112.552	163.262	757.356	837.688
08QH1B-43	530.894	12632.8	3.62909	20.7555	17.8744	0.152656	21.3073	0.0229798	11.5977	0.544305		146.461	16.7946	144.255	28.6609	108.109	425.088
08QH1B-45	618.511	7403.35	2.6033	22.5069	34.4331	0.0845267	35.0279	0.0137978	6.42764	0.183501		88.3381	5.63933	82.3919	27.7271	-86.7383	866.092
08QH1B-46	110.75	2891.29	1.75086	14.244	36.6068	0.370629	39.0836	0.0382886	13.692	0.350327		242.216	32.5493	320.12	107.713	934.358	776.616
08QH1B-47	433.731	142451	3.81361	9.0355	0.974601	3.78374	3.35851	0.247955	3.21399	0.956969		1427.92	41.1663	1589.3	26.9794	1810.5	17.7087
08QH1B-49	838.414	19215.2	4.09125	19.599	8.28956	0.179457	12.7974	0.0255091	9.74975	0.761852		162.38	15.6339	167.594	19.7737	241.853	191.326
08QH1B-50	188.114	2016.75	2.8647	23.142	105.929	0.082835	107.303	0.0139031	17.1154	0.159506		89.0081	15.1295	80.8068	83.5356	-155.387	1215.06
08QH1B-52	669.079	6308.04	1.91556	24.6238	28.7339	0.0797047	29.0529	0.0142344	4.29396	0.147798		91.1137	3.88486	77.8673	21.7804	-311.936	749.003
08QH1B-53	1077.98	21235	3.98633	20.6208	8.84711	0.24253	10.0134	0.0362718	4.69008	0.46838		229.683	10.5827	220.49	19.8484	123.456	208.71
08QH1B-55	583.006	4989.66	1.97685	20.1367	21.4031	0.0956163	22.6107	0.0139643	7.29064	0.322442		89.3968	6.47262	92.7218	20.0389	179.117	503.938
08QH1B-57	1285	15084.8	4.39336	21.1156	7.66215	0.0907579	8.65994	0.0138991	4.03559	0.466007		88.9826	3.5663	88.2092	7.31659	67.3078	182.576
08QH1B-58	634.445	5491.66	1.92634	17.4111	8.34221	0.105037	11.5302	0.0132639	7.95945	0.690314		84.9422	6.71658	101.416	11.1289	508.276	183.729
08QH1B-59	1394.9	10679.8	2.60976	21.0696	7.48556	0.100648	9.19009	0.0153801	5.33143	0.580128		98.3917	5.20586	97.3742	8.53328	72.5479	178.171
08QH1B-60	1601.58	21400.8	1.47181	20.0094	5.51513	0.149723	5.97278	0.021728	2.29292	0.383895		138.568	3.14334	141.667	7.89787	193.925	128.299
08QH1B-61	471.739	3739.35	2.1252	18.9381	32.0722	0.102502	34.0776	0.0140788	11.5179	0.337989		90.1251	10.3083	99.0833	32.1809	320.392	746.127
08QH1B-62	345.854	3389	1.28097	15.2645	30.4953	0.113219	32.1975	0.0125343	10.3303	0.320843		80.2988	8.24368	108.905	33.2617	790.788	654.431
08QH1B-63	129.993	2399.15	1.61246	-1.85704	1009.44	-1.61829	1009.56	0.0217961	15.2826	0.0151379		138.997	21.0151	#NUM!	#NUM!	0	287.432
08QH1B-64	1013.41	12031.2	2.72297	19.113	15.2312	0.107747	15.4204	0.0149359	2.40819	0.156169		95.571	2.28456	103.902	15.2307	299.415	349.175
08QH1B-65	2313.67	12759.3	6.11612	21.0743	10.5356	0.093307	10.9855	0.0142615	3.11161	0.283246		91.2862	2.82045	90.5793	9.51996	72.0182	251.096
08QH1B-66	394.234	5022.11	1.10064	15.1785	26.8059	0.114078	28.2308	0.0125583	8.85557	0.313685		80.4517	7.08018	109.689	29.3604	802.636	571.133
08QH1B-68	677.516	8401.99	1.59519	21.5682	19.5125	0.092164	20.2063	0.014417	5.24961	0.259801		92.2743	4.80954	89.5172	17.3154	16.5909	472.657
08QH1B-70	1242.92	6670.1	1.78335	20.1967	12.4924	0.091584	13.6923	0.0134152	5.60535	0.409378		85.9051	4.78334	88.9778	11.6651	172.18	292.555
08QH1B-71	357.88	6152.71	2.28824	21.3476	15.2247	0.160546	16.8798	0.024857	7.28955	0.43185		158.28	11.3974	151.181	23.7146	41.2821	365.902
08QH1B-72	597.639	6062.35	1.69202	18.1505	26.6046	0.0975589	28.8126	0.0128426	11.0617	0.38392		82.2618	9.04179	94.5206	26.0104	416.058	604.094
08QH1B-73	569.1	10811.4	1.75649	21.4044	9.53451	0.153543	12.2743	0.023836	7.72988	0.629763		151.854	11.601	145.036	16.5906	34.8974	228.725
08QH1B-74	982.644	8922.69	1.70014	22.7582	23.1812	0.0908274	23.6906	0.0149918	4.88635	0.206257		95.9261	4.65259	88.2738	20.032	-114.021	577.65
08QH1B-76	361.957	3074.57	1.36416	11.7559	113.868	0.168918	114.781	0.0144023	14.4496	0.125889		92.1808	13.225	158.48	169.99	1316.97	182.794
08QH1B-77	238.816	1738.95	1.91008	32.7008	90.8998	0.0550097	92.4309	0.0130466	16.7538	0.181258		83.5597	13.9091	54.3738	48.9741	-1100.4	1822.43
08QH1B-78	122.777	1469.02	3.2417	6.26407	283.977	0.351561	284.291	0.0159719	13.3495	0.0469574		102.148	13.5288	305.894	963.939	2451.84	126.082
08QH1B-80	515.586	3386.54	1.97397	17.9095	22.5719	0.130175	24.6561	0.0169087	9.92134	0.402389		108.089	10.6345	124.255	28.8438	445.847	507.522
08QH1B-81	284.82	7014.15	3.31243	21.2695	18.857	0.180482	23.7384	0.0278413	14.4196	0.607438		177.024	25.1789	168.475	36.8676	50.0255	453.694
08QH1B-82	352.614	3012.95	1.83578	25.9957	60.3645	0.0752157	60.8935	0.0141811	8.00896	0.131524		90.7749	7.21918	73.6369	43.2789	-452.833	1737.93
08QH1B-83	590.787	5552.14	1.82802	20.1897	34.6538	0.097011	35.4673	0.0142053	7.55249	0.212943		90.9288	6.81918	94.0135	31.8574	172.984	831.026
08QH1B-84	650.929	27439.2	1.76514	20.7148	12.2803	0.184818	12.4273	0.0277666	1.90573	0.153351		176.555	3.319	172.198	19.6858	112.753	290.713
08QH1B-90	380.592	4374.87	1.32136	29.6496	60.1354	0.0610226	60.4364	0.0131223	6.02391	0.0996735		84.0413	5.02971	60.1443	35.3077	-812.826	1860.58
08QH1B-93	451.6	3514.77	2.53509	21.4471	40.3542	0.0865349	41.2178	0.0134604	8.3931	0.203628		86.1925	7.18608	84.2703	33.3441	30.1454	1003.67
08QH1B-96	747.65	8714.46	3.1777	19.5402	10.2657	0.15174	12.0911	0.0215044	6.38837	0.528352		137.157	8.66952	143.447	16.1763	248.809	236.83
08QH1B-98	344.03	4303.77	3.81577	24.9642	22.6518	0.12902	24.9353	0.0233601	10.4243	0.418052		148.857	15.3395	123.217	28.9413	-347.239	590.672
08QH1B-101	156.073	1592.66	6.69691	21.899	38.8329	0.15813	41.9172	0.0251152	15.7818	0.376498		159.903	24.9253	149.065	58.1773	-20.0606	972.009
08QH1B-102	567.332	9104.91	2.62348	25.0965	21.345	0.0841848	22.9473	0.0153231	8.42423	0.367112		98.0296	8.19577	82.0718	18.0941	-360.891	557.452
08QH1B-104	2490.35	31645.9	2.21998	20.299	6.70653	0.106924	6.90973	0.0157416	1.66338	0.24073		100.687	1.66179	103.148	6.77728	160.371	157.044
08QH1B-105	223.519	8435.27	2.19327	19.2221	12.9271	0.471889	13.7368	0.0657869	4.64644	0.338249		410.723	18.4888	392.493	44.7466	286.446	296.625
08QH1B-106	156.686	4605.92	2.54569	27.9591	56.4207	0.121013	57.4791	0.0245388	10.9796	0.191018		156.278	16.9523	115.99	63.0839	-648.738	1667.16
08QH1B-107	737.833	3863.43	1.67725	20.9405	20.6784	0.0942015	21.1726	0.0143068	4.54783	0.214798		91.5741	4.13519	91.4098	18.5103	87.1441	494.845
08QH1B-108	647.942	7570.14	2.70873	25.1749	51.3692	0.0939579	51.4651	0.0171553	3.14003	0.0610128		109.653	3.41401	91.1836	44.9116	-368.967	1414.39
Sample 08TC37
08TC37-1	624.829	11046.9	0.948731	21.1954	5.34433	0.170773	6.36951	0.0262519	3.46538	0.544057		167.047	5.71446	160.09	9.434	58.3752	127.463
08TC37-2	772.879	10980.1	1.97055	20.9789	9.4094	0.104584	10.3947	0.0159128	4.41735	0.424962		101.773	4.46037	100.999	9.99364	82.7521	223.715
08TC37-3	294.892	5842.6	1.11112	22.3059	33.7225	0.113546	33.9779	0.0183692	4.15766	0.122364		117.341	4.83451	109.204	35.1936	-64.7914	843.75
08TC37-4	322.656	11308.4	1.63601	18.6106	17.0554	0.127198	18.1585	0.0171688	6.23239	0.343222		109.738	6.78139	121.577	20.8089	359.845	387.323
08TC37-5	143.104	61448.1	0.958407	5.3064	1.02394	13.8034	2.60669	0.531232	2.39716	0.919619		2746.64	53.6127	2736.31	24.6847	2728.68	16.8605
08TC37-6	339.137	10600.4	1.05888	19.0822	12.7007	0.192761	13.1671	0.0266775	3.47341	0.263794		169.72	5.81815	178.982	21.6098	303.096	290.52
08TC37-7	441.424	23677	1.56526	19.7302	9.46173	0.204621	9.53562	0.0292807	1.1848	0.12425		186.045	2.17276	189.029	16.4481	226.477	219.082
08TC37-8	84.091	2244.01	2.33696	23.0457	129.104	0.139947	129.131	0.0233911	2.63522	0.0204073		149.052	3.88279	132.996	162.337	-145.038	1441.1
08TC37-9	116.304	4581.52	2.36628	15.7834	99.8934	0.134472	117.346	0.0153933	61.5735	0.52472		98.4754	60.1757	128.108	142.154	720.244	#VALUE!
08TC37-10	419.534	13518	1.00711	20.6417	14.2792	0.133108	14.3516	0.0199273	1.43989	0.100329		127.197	1.81354	126.887	17.1201	121.108	337.905
08TC37-12	105.363	4731.86	1.79421	15.4158	26.7844	0.200139	26.8198	0.0223767	1.3787	0.051406		142.659	1.94524	185.244	45.444	770.06	573.613
08TC37-13	487.454	11792.7	2.03624	21.4394	19.3531	0.0946469	19.5365	0.0147169	2.67076	0.136706		94.1801	2.49704	91.823	17.1534	30.9857	467.467
08TC37-14	195.525	8510.07	2.45359	19.5358	27.2297	0.182532	27.2717	0.0258624	1.51234	0.0554545		164.6	2.4578	170.237	42.7685	249.296	637.152
08TC37-15	670.338	79276.6	8.78561	17.3267	2.41469	0.604418	4.87274	0.0759544	4.23236	0.868579		471.93	19.2602	480.033	18.6411	518.91	53.0088
08TC37-16	240.39	161531	1.47192	9.52915	1.51375	4.38556	2.46661	0.303094	1.9475	0.789544		1706.63	29.2012	1709.62	20.3978	1713.27	27.8411
08TC37-17	310.973	9676.81	1.01772	19.6938	19.9935	0.178222	20.2739	0.0254561	3.36017	0.165739		162.046	5.37717	166.53	31.1486	230.711	465.753
08TC37-18	436.213	22721.8	5.36267	16.5948	6.67886	0.589722	7.07387	0.0709773	2.33077	0.329489		442.041	9.95764	470.69	26.651	612.891	144.436
08TC37-19	806.651	5315.91	1.17032	22.0355	15.0974	0.0925975	15.2921	0.0147986	2.43225	0.159053		94.699	2.28648	89.9202	13.1601	-35.1147	368.098
08TC37-20	1197.5	29823.7	3.48534	20.874	5.12441	0.123602	7.58543	0.0187124	5.59278	0.737306		119.513	6.62254	118.332	8.47293	94.6628	121.383
08TC37-22	164.889	77761.3	1.15654	8.74217	1.9238	5.52267	5.69623	0.350161	5.36154	0.941243		1935.36	89.6432	1904.13	49.0093	1870.25	34.7053
08TC37-24	1080.19	24097.5	0.88434	20.2104	13.3184	0.099126	13.6195	0.0145298	2.84802	0.209114		92.9915	2.6294	95.9692	12.4725	170.592	312.138
08TC37-25	127.596	3615.19	2.07207	16.9583	43.9838	0.149477	44.0712	0.0183847	2.77482	0.0629621		117.439	3.22922	141.45	58.2553	565.936	1004.71
08TC37-26	295.95	7927.11	1.28145	21.0323	24.4179	0.178904	24.804	0.02729	4.35939	0.175753		173.565	7.46544	167.117	38.2383	76.714	587.679
08TC37-27	273.57	14141.7	1.51254	20.5465	21.1042	0.212029	21.2186	0.0315961	2.20029	0.103697		200.53	4.34432	195.254	37.7076	131.974	501.064
08TC37-28	948.996	24931.4	1.79325	21.8711	8.89126	0.0922722	9.50509	0.0146366	3.36039	0.353536		93.6696	3.12491	89.6178	8.15334	-16.9705	215.365
08TC37-29	85.3322	25014.8	3.14159	10.5101	3.65717	3.19856	5.44702	0.243815	4.03672	0.741088		1406.5	51.0107	1456.81	42.1592	1530.96	68.8851
08TC37-30	1090.43	18981.2	2.3368	22.223	10.8824	0.0876906	11.026	0.0141337	1.77393	0.160886		90.4736	1.59373	85.3497	9.02627	-55.7199	265.754
08TC37-32	659.291	26130.7	2.39791	19.4098	8.45123	0.149938	8.65727	0.0211073	1.87751	0.216871		134.65	2.50185	141.857	11.4622	264.197	194.297
08TC37-33	430.777	12304.7	1.75476	19.2737	17.6838	0.14945	18.0788	0.0208911	3.75865	0.207903		133.285	4.95828	141.427	23.8719	280.333	407.499
08TC37-34	497.134	17445	1.91249	23.5408	12.6644	0.0879958	13.2569	0.0150238	3.91892	0.295613		96.1296	3.73929	85.6346	10.8874	-197.999	318.227
08TC37-35	4099.64	7766.28	0.441635	19.7323	3.70788	0.17495	3.96066	0.0250375	1.39229	0.35153		159.415	2.19229	163.706	5.9882	226.224	85.7288
08TC37-36	104.224	2313.96	2.71144	19.7843	114.062	0.119222	114.176	0.0171071	5.0907	0.0445866		109.347	5.51958	114.367	124.108	220.149	982.912
08TC37-37	302.944	6717.75	2.38491	21.9557	21.448	0.103032	22.1556	0.0164066	5.55453	0.250706		104.906	5.77987	99.5715	21.0165	-26.319	524.706
08TC37-38	1078.57	18535.7	1.79469	20.4104	5.20475	0.0926023	5.47345	0.0137079	1.69387	0.309471		87.7668	1.47658	89.9246	4.71035	147.558	122.085
08TC37-39	130.312	3321.8	3.30125	20.3238	34.7082	0.129468	37.7367	0.0190838	14.8122	0.392513		121.863	17.8811	123.619	43.9494	157.509	834.741
08TC37-40	555.781	7738.92	2.33162	21.2015	25.0966	0.10718	25.5371	0.0164809	4.7227	0.184935		105.377	4.93617	103.383	25.1066	57.6444	606.603
08TC37-41	668.689	10939.2	1.98849	23.0075	10.635	0.0860423	11.6095	0.0143575	4.65578	0.401033		91.8965	4.24814	83.8099	9.33942	-140.93	264.005
08TC37-42	846.437	33990.9	2.02873	20.3345	7.59922	0.160348	9.12676	0.023648	5.05467	0.553829		150.67	7.52756	151.007	12.8069	156.319	178.092
08TC37-43	167.345	52464.3	2.50595	8.82346	0.811924	4.82029	5.21867	0.308468	5.15513	0.987823		1733.17	78.3478	1788.44	43.9126	1853.54	14.6753
08TC37-45	56.2303	1444.92	2.23528	27.9897	95.2999	0.112364	95.3765	0.02281	3.82366	0.0400902		145.391	5.49704	108.126	98.1301	-651.745	1523.97
08TC37-46	840.505	25926.5	2.42329	19.873	5.95665	0.111346	7.11809	0.0160485	3.89686	0.547459		102.634	3.96783	107.195	7.24143	209.773	138.195
08TC37-47	2217.84	42411.8	1.23645	20.2778	2.73498	0.116349	3.70916	0.0171113	2.50554	0.675502		109.374	2.71729	111.757	3.92529	162.81	63.9554
08TC37-48	130.847	2606.89	2.45987	12.9427	105.217	0.175784	105.364	0.0165007	5.55698	0.0527408		105.502	5.81503	164.426	161.289	1128.03	254.922
08TC37-50	123.285	6807.56	2.29877	28.5034	30.2494	0.146564	30.571	0.0302986	4.42294	0.144678		192.417	8.38473	138.874	39.7	-701.992	855.996
08TC37-51	195.562	8043.27	1.15108	22.379	14.8005	0.16693	15.767	0.027094	5.43561	0.344745		172.335	9.24335	156.751	22.9056	-72.7895	363.41
08TC37-52	297.396	14148.1	2.89383	19.0832	15.9499	0.145358	16.4571	0.0201182	4.05448	0.246366		128.403	5.15457	137.805	21.2102	303.014	365.601
08TC37-53	196.278	5460.65	2.48026	36.0481	42.6669	0.0619605	42.783	0.0161993	3.14946	0.0736147		103.591	3.23647	61.0415	25.3512	-1406.3	1439.68
08TC37-54	41.341	1258.36	2.43643	10.0223	115.777	0.231985	115.793	0.0168626	1.87988	0.0162349		107.797	2.00961	211.836	225.006	1619.92	5.09176
08TC37-55	590.994	14175.8	2.34147	22.0513	20.1879	0.105387	21.0698	0.0168547	6.03211	0.286291		107.747	6.44539	101.737	20.3996	-36.8609	494.307
08TC37-56	170.131	14018	2.42255	25.7058	27.1499	0.163388	27.2366	0.0304614	2.17145	0.0797252		193.436	4.13795	153.665	38.859	-423.356	722.379
08TC37-57	345.61	12044	2.51761	22.4625	27.4323	0.0884231	27.6493	0.0144053	3.45748	0.125048		92.2002	3.16511	86.0334	22.8116	-81.8994	682.606
08TC37-58	244.68	10648.2	2.45004	21.1696	12.4329	0.183919	12.6641	0.0282383	2.40914	0.190234		179.513	4.26506	171.427	19.9786	61.226	297.189
08TC37-59	840.061	14134.4	1.51748	21.3232	13.77	0.098658	14.1577	0.0152575	3.29083	0.232441		97.6133	3.18809	95.5368	12.9097	44.0001	330.468
08TC37-60	227.625	16233.4	1.92843	22.5537	28.2265	0.184421	28.4537	0.0301666	3.58911	0.126138		191.591	6.77522	171.857	45.015	-91.8277	704.409
08TC37-61	395.359	4626.76	2.59818	20.0055	22.5468	0.106584	22.7744	0.0154647	3.21179	0.141026		98.929	3.15313	102.836	22.2769	194.373	529.993
08TC37-62	254.557	3224.34	1.93976	16.9904	27.153	0.142835	27.2074	0.0176011	1.71996	0.0632165		112.477	1.91777	135.566	34.5412	561.811	601.921
08TC37-63	247.867	16553.2	1.71072	23.147	21.4397	0.165903	21.4688	0.0278514	1.11828	0.0520886		177.087	1.95338	155.857	31.0289	-155.922	537.699
08TC37-64	89.8386	2647.56	2.85415	12.7553	74.9158	0.216545	75.0926	0.0200326	5.15022	0.0685849		127.862	6.52028	199.03	136.538	1156.98	1799.43
08TC37-65	404.954	10156.4	2.96687	20.7621	17.4374	0.110352	17.6196	0.0166169	2.52778	0.143464		106.239	2.66348	106.287	17.7823	107.385	414.614
08TC37-66	127.428	3753.57	1.43297	17.5994	205.354	0.163738	205.385	0.0209	3.58157	0.0174383		133.341	4.72666	153.97	302.026	484.586	1482.86
08TC37-67	1184.49	17748.8	1.81152	21.9923	7.78656	0.101318	7.86964	0.0161605	1.14047	0.14492		103.345	1.16922	97.9921	7.35132	-30.3568	188.995
08TC37-68	97.464	1743.91	1.84638	20.271	55.499	0.116598	55.7014	0.0171421	4.74386	0.0851659		109.569	5.15386	111.983	59.1263	163.601	1401.92
08TC37-69	167.33	9800.76	2.61065	21.5585	18.9372	0.377817	19.3653	0.0590743	4.04925	0.209099		369.993	14.5601	325.431	53.97	17.6798	458.429
08TC37-70	197.345	8246.87	2.13696	19.7961	17.9813	0.175001	18.1471	0.0251258	2.44785	0.134889		159.97	3.86763	163.75	27.4503	218.767	419.086
08TC37-71	1805.83	118191	1.80442	20.8138	4.75803	0.170901	5.31478	0.0257985	2.36815	0.445577		164.199	3.83936	160.201	7.87678	101.468	112.56
08TC37-72	471.662	20360.5	2.77788	25.1098	23.7286	0.0889051	23.8444	0.0161908	2.3478	0.0984634		103.537	2.41142	86.483	19.7701	-362.26	621.277
08TC37-73	241.911	35306.1	1.56337	15.4368	18.5813	0.314588	22.519	0.0352208	12.7216	0.564928		223.141	27.9017	277.731	54.7713	767.183	394.583
08TC37-74	193.853	12909.5	1.02667	22.3642	38.5497	0.143321	38.6239	0.0232467	2.39243	0.0619417		148.142	3.50379	135.997	49.2002	-71.1678	973.679
08TC37-75	233.576	1159.54	1.97289	15.909	34.855	0.130428	34.9841	0.0150491	3.00287	0.0858353		96.2903	2.86998	124.482	41.0075	703.395	763.957
08TC37-76	178.858	3571.05	2.74655	28.27	67.626	0.0694538	67.7112	0.0142403	3.39424	0.0501282		91.1517	3.07213	68.181	44.6791	-679.209	2096.91
08TC37-77	267.329	15882.9	2.44923	20.4651	11.0773	0.199624	11.3555	0.0296295	2.49826	0.220005		188.229	4.63446	184.808	19.1891	141.32	260.694
08TC37-78	1605.23	58940.4	2.50101	20.5508	9.93486	0.105838	10.2934	0.015775	2.69295	0.26162		100.899	2.696	102.151	10.0035	131.467	234.109
08TC37-79	1200.82	65991.4	4.94182	21.3243	6.34973	0.133818	6.45188	0.0206961	1.14357	0.177245		132.053	1.49476	127.523	7.73207	43.8623	151.918
08TC37-80	229.715	7044.89	4.04033	26.47	29.8159	0.156238	30.0798	0.0299944	3.97533	0.13216		190.513	7.46271	147.405	41.2937	-500.742	808.561
08TC37-81	763.72	13511.5	4.52336	20.1509	12.4409	0.106138	12.6199	0.0155119	2.11841	0.167862		99.2285	2.08597	102.427	12.2962	177.47	291.047
08TC37-82	475.297	15989	4.27342	22.2909	20.2219	0.119387	20.5169	0.0193012	3.46647	0.168957		123.238	4.23142	114.516	22.2222	-63.1586	497.622
08TC37-83	216.695	7407.41	7.19973	17.0423	29.7739	0.153392	30.06	0.0189596	4.13775	0.13765		121.077	4.96312	144.902	40.614	555.129	663.11
08TC37-84	381.742	32117.8	4.62418	19.1652	25.2245	0.107798	25.3986	0.0149838	2.96882	0.116889		95.875	2.8253	103.949	25.1002	293.203	584.23
08TC37-85	439.687	12061.9	2.63198	21.1306	14.7078	0.11047	15.5562	0.0169299	5.06727	0.325738		108.224	5.43822	106.395	15.7147	65.6463	351.75
08TC37-86	286.912	9298.56	2.54943	20.7417	13.0897	0.160668	13.261	0.0241698	2.12488	0.160235		153.955	3.23262	151.288	18.6413	109.701	310.189
08TC37-87	315.465	10266.1	8.30952	22.4174	28.9162	0.15935	29.0775	0.0259082	3.05892	0.105199		164.888	4.97984	150.134	40.6029	-76.9795	720.201
08TC37-88	346.839	5355.31	4.48828	17.7	16.0157	0.190067	16.2825	0.0243994	2.93514	0.180264		155.401	4.50668	176.687	26.4109	471.954	356.453
08TC37-90	620.247	17741.6	4.19489	22.0656	16.9487	0.0960876	17.0317	0.0153774	1.67915	0.09859		98.3744	1.63932	93.1585	15.1615	-38.4285	414.023
08TC37-91	323.529	5924.64	5.20596	28.9017	28.1387	0.0760669	28.1765	0.0159448	1.45962	0.0518028		101.976	1.47675	74.4404	20.227	-740.706	800.766
08TC37-92	376.909	9627.43	3.78681	19.7375	19.3009	0.111823	19.8454	0.0160074	4.61677	0.232637		102.373	4.689	107.631	20.2694	225.639	449.76
08TC37-93	628.849	15654.7	7.14426	24.4308	17.9002	0.0843264	18.0336	0.0149417	2.18952	0.121413		95.6077	2.0779	82.2043	14.2412	-291.811	459.752
08TC37-94	132.259	8739.5	5.92868	24.994	47.7288	0.165972	47.7829	0.0300863	2.27276	0.0475643		191.088	4.27925	155.917	69.1704	-350.309	1297.16
08TC37-95	189.428	8914.02	4.51536	18.8275	34.6377	0.124948	35.0645	0.0170616	5.45462	0.155559		109.058	5.89867	119.548	39.5652	333.683	807.295
08TC37-96	129.751	939.383	3.46974	20.0176	22.1859	0.195468	22.7003	0.0283784	4.80511	0.211676		180.391	8.54786	181.285	37.7051	192.966	521.455
08TC37-97	385.574	3119.65	5.87098	25.6609	21.7678	0.102756	21.9233	0.019124	2.60629	0.118882		122.117	3.15277	99.3173	20.7455	-418.778	575.418
08TC37-98	539.251	8757.88	5.1166	20.9484	10.3251	0.179105	10.7614	0.0272117	3.03288	0.281831		173.074	5.17928	167.29	16.5993	86.2499	245.402
08TC37-99	388.955	92596	2.59433	19.1899	15.3782	0.186756	15.6058	0.0259924	2.65539	0.170154		165.417	4.33661	173.858	24.9411	290.275	353.155
08TC37-100	245.429	10431.5	4.92652	18.4095	24.0892	0.169711	24.4393	0.0226596	4.1222	0.168671		144.443	5.88801	159.168	36.0192	384.308	548.359
* Radiogenic
§ Decay constants used in age calculations: λ238U = 1.55125 x 10-10 λ235U= 9.8485x10-10 (Jaffey et al., 1971); 238U/235U = 137.88 (Chen and Wasserberg, 1981). Uncertainties are given as ± 2σ in last three figures.
Common Pb correction from measured 206Pb/204Pb, with initial Pb composition from Stacey and Kramers (1975).
† Analyses in which epoxy was overlapped and those with greater than 10% uncertainty, 30% discordance, and/or 5% reverse discordance are excluded. Accepted ages calculated using 206Pb/238U ages for grains younger than 800 Ma and 207Pb/206Pb ages for grains older than 800 Ma.

## Sheet: SD2
Table SD2. University of California Santa Cruz LA-MC-ICPMS U-Pb detrital zircon data for Nacimiento Franciscan rocks.†
				Isotope ratios								Isotopic ages (Ma)§
Analysis	U	206Pb	U/Th	206Pb*	±	207Pb*	±	206Pb*	±	Error		206Pb*	±	207Pb*	±	206Pb*	±
	(ppm)	204Pb		207Pb*	(%)	235U*	(%)	238U	(%)	correlation		238U	(Ma)	235U*	(Ma)	207Pb*	(Ma)
Sample 13NB1
13NB1_1.FIN2				20.5339	4.10678	0.1058	8.79017	0.01677	8.34824	0.050893		107.2	8.7	101.8	8.5	136	73
13NB1_2.FIN2				4.01606	8.03213	0.842	13.0641	0.02323	8.60956	0.95122		147.9	13	567	61	2730	190
13NB1_3.FIN2				18.9934	2.46914	0.1054	8.25427	0.01554	8.36551	0.25703		99.37	7.9	101.8	8	307	55
13NB1_4.FIN2				20.202	3.0303	0.0906	8.38852	0.0142	8.4507	0.14844		90.9	7.3	87.9	7.1	146	56
13NB1_5.FIN2				20.5761	3.49794	0.1098	8.56102	0.01769	7.91408	0.02384		113	9.1	106.1	8.6	125	69
13NB1_6.FIN2				11.0607	1.88032	2.792	8.23782	0.2421	8.26105	0.70461		1398	100	1354.4	55	1433	35
13NB1_7.FIN2				17.2414	4.48276	0.1142	8.75657	0.01513	7.93126	0.14879		96.8	7.9	109.6	9.3	500	92
13NB1_8.FIN2				11.4653	1.94909	1.451	8.95934	0.1286	8.55365	0.98565		781	65	913	55	1365	37
13NB1_9.FIN2				11.4587	1.83339	2.504	7.98722	0.2202	8.17439	0.68231		1282.7	94	1273	59	1365.9	35
13NB1_10.FIN2				20.2511	2.22762	0.0996	8.23293	0.0154	7.79221	0.52212		98.52	7.9	96.5	7.5	163	47
13NB1_11.FIN2				19.1571	3.2567	0.0962	8.52391	0.01365	8.05861	0.14551		87.4	7.1	93.1	7.4	281	64
13NB1_12.FIN2				20.1207	3.21932	0.1051	8.56327	0.01571	8.27498	0.065241		100.5	8.1	101.5	8.3	185	68
13NB1_13.FIN2				10.784	1.83328	1.246	8.02568	0.09945	8.1448	0.86388		611.1	47	821.2	46	1483.3	36
13NB1_14.FIN2				20.8768	3.54906	0.0994	8.65191	0.01513	7.93126	0.048061		96.77	7.8	96.1	7.9	116	68
13NB1_15.FIN2				17.762	2.6643	0.262	8.39695	0.03381	7.9858	0.12774		214.3	17	235.9	17	452	56
13NB1_16.FIN2				18.018	3.42342	0.2021	8.41168	0.02606	8.05833	0.22034		165.8	13	186.2	15	408	70
13NB1_18.FIN2				20.5592	2.6727	0.0889	8.32396	0.01318	8.34598	0.12685		84.42	6.8	86.5	6.8	133	54
13NB1_19.FIN2				19.802	4.35644	0.1175	9.3617	0.01699	8.24014	0.1879		108.6	8.8	113	9.5	213	81
13NB1_20.FIN2				17.1233	9.24658	0.25	48	0.01487	10.0874	0.998		95	9.3	123	21	338	76
13NB1_21.FIN2				7.02741	6.04357	0.353	10.7649	0.01759	8.52757	0.72744		112.4	9.2	304	28	2191	100
13NB1_22.FIN2				20.4708	2.25179	0.111	8.28829	0.01605	8.09969	0.11619		102.61	8.2	106.8	8.4	139	49
13NB1_23.FIN2				20.1329	2.21462	0.1189	8.24222	0.01699	8.24014	0.54721		108.59	8.6	114	8.9	177	49
13NB1_24.FIN2				18.1159	4.16667	0.1051	9.32445	0.01348	8.16024	0.54462		86.3	7.3	101.3	9.2	390	91
13NB1_25.FIN2				14.7929	3.25444	0.1578	8.87199	0.01663	8.41852	0.41585		106.3	8.7	148.4	12	825	67
13NB1_26.FIN2				16.9205	2.87648	0.1356	8.11209	0.01664	8.41346	0.40464		106.4	8.6	129.1	10	549	62
13NB1_27.FIN2				15.6986	3.2967	0.435	8.73563	0.0493	8.31643	0.53269		309.8	25	365	27	719	68
13NB1_28.FIN2				18.9394	4.16667	0.1314	9.13242	0.01793	7.80814	0.60295		114.6	9.3	123.9	10	271	78
13NB1_29.FIN2				9.42241	1.97871	4.693	8.09717	0.3175	8.18898	0.70119		1777	130	1764.9	68	1732	36
13NB1_30.FIN2				19.4553	2.91829	0.1036	8.49421	0.01456	8.24176	0.24765		93.15	7.5	99.7	8.1	239	58
13NB1_31.FIN2				19.5312	3.32031	0.1335	8.2397	0.01909	8.38135	0.34666		121.9	9.8	127.1	10	241	72
13NB1_32.FIN2				19.7239	3.15582	0.1153	8.67303	0.01638	7.93651	0.63322		104.76	8.4	109.6	7.4	190	52
13NB1_33.FIN2				15.748	5.35433	0.1433	9.76971	0.01623	8.00986	0.59108		103.8	8.3	133.5	11	670	110
13NB1_34.FIN2				13.2802	5.44489	0.1642	9.74421	0.0159	8.1761	0.42401		101.7	8.2	154.5	14	1000	110
13NB1_35.FIN2				16.2602	5.04065	0.1429	9.79706	0.01669	8.38826	0.64852		106.7	8.6	133.5	12	537	88
13NB1_36.FIN2				18.3486	3.30275	0.1038	8.76686	0.01417	8.4686	0.64028		90.7	7.3	100	8.3	380	73
13NB1_37.FIN2				20.1369	2.41643	0.1016	8.26772	0.014993	8.00374	0.33017		95.93	7.7	98.3	7.8	175	51
13NB1_38.FIN2				13.2873	1.99309	1.409	8.51668	0.1382	7.95948	0.88049		834	65	893	50	1072	41
13NB1_39.FIN2				19.4326	2.52623	0.1629	8.59423	0.02337	8.13008	0.50592		148.9	12	153.3	12	254	57
13NB1_40.FIN2				19.9203	2.98805	0.1121	8.56378	0.01619	8.02965	0.46982		103.6	8.3	107.6	8.7	205	62
13NB1_41.FIN2				19.8807	3.18091	0.1074	8.56611	0.01574	8.25921	0.36668		100.69	8.1	103.4	8.4	186	64
13NB1_42.FIN2				6.75676	8.78378	0.398	13.0653	0.0191	8.37696	0.82731		122	10	333	37	2250	170
13NB1_43.FIN2				14.5138	3.19303	0.1603	8.73362	0.01715	8.16327	0.48862		109.6	8.9	151.2	12	874	64
13NB1_44.FIN2				9.73615	1.94723	3.569	8.40572	0.2552	8.22884	0.94301		1464	110	1539	67	1673	35
13NB1_45.FIN2				19.6928	2.56006	0.1127	8.34073	0.01627	7.99017	0.15773		104.01	8.3	108.6	8.3	225	56
13NB1_46.FIN2				16.3132	5.38336	0.1433	9.76971	0.01699	8.24014	0.79932		108.62	8.7	135.1	12	545	88
13NB1_47.FIN2				18.4502	3.13653	0.1085	8.47926	0.01471	8.15772	0.351		94.15	7.6	104.4	8.4	353	66
13NB1_48.FIN2				19.305	2.89575	0.1102	8.4392	0.01548	8.39793	0.1378		99.02	7.9	106.6	8.5	257	61
13NB1_49.FIN2				19.8413	2.77778	0.0903	8.30565	0.01301	7.6864	0.16358		83.33	6.7	87.7	7	211	58
13NB1_50.FIN2				19.6194	2.35433	0.0942	8.1741	0.013377	8.22307	0.29474		85.66	6.9	91.6	7.1	230	51
13NB1_51.FIN2				20.4583	3.68249	0.1535	6.12378	0.02334	5.14139	0.2791		148.7	7.8	145	8.2	139	83
13NB1_52.FIN2				15.674	4.85893	0.203	6.89655	0.02375	5.47368	0.36955		151.3	8.1	187.2	12	681	100
13NB1_53.FIN2				13.5685	5.97015	0.1609	8.07955	0.01618	5.37701	0.34255		103.5	5.5	151.1	11	930	130
13NB1_54.FIN2				21.0526	5.68421	0.109	7.24771	0.01729	5.49451	-0.0057144		110.5	6	104.7	7.2	80	100
13NB1_55.FIN2				20.4918	5.7377	0.1078	7.32839	0.01655	5.49849	0.19399		105.8	5.8	103.7	7.2	137	110
13NB1_56.FIN2				20.5761	4.11523	0.1093	6.3129	0.01666	5.34214	0.18257		106.5	5.6	105.2	6.3	137	85
13NB1_57.FIN2				21.322	5.11727	0.1004	6.87251	0.01577	5.38998	0.08345		100.9	5.4	97.4	6.5	68	97
13NB1_58.FIN2				18.5185	7.77778	0.1112	8.81295	0.01523	5.77807	0.13474		97.4	5.6	106.6	9	310	150
13NB1_59.FIN2				20.9644	5.03145	0.1112	6.92446	0.01723	5.39756	0.12394		110.1	5.9	106.8	7	102	96
13NB1_60.FIN2				9.31532	3.53982	4.772	6.07712	0.329	5.16717	0.77788		1833	85	1779.7	51	1753	65
13NB1_61.FIN2				19.0186	3.99391	0.1186	6.32378	0.01686	5.39739	0.46076		107.8	5.8	113.8	6.8	301	90
13NB1_62.FIN2				20.6612	4.33884	0.1304	6.67178	0.01964	5.60081	0.53975		125.3	6.9	124.1	7.8	124	87
13NB1_63.FIN2				17.1821	5.49828	0.1198	7.34558	0.0154	5.71429	0.31365		98.5	5.6	114.6	8	531	110
13NB1_64.FIN2				20.3666	5.29532	0.1097	7.20146	0.01631	5.51809	0.33047		104.3	5.7	105.6	7.3	161	110
13NB1_65.FIN2				11.8203	3.6643	2.322	6.02929	0.2026	5.42942	0.6295		1188	58	1218	44	1305	73
13NB1_66.FIN2				20.0401	4.80962	0.1136	6.77817	0.01681	5.6514	0.26043		107.5	6	109.2	7	199	94
13NB1_67.FIN2				21.4592	4.29185	0.0983	6.40895	0.01561	5.38117	0.19587		99.9	5.3	95.2	5.8	33	89
13NB1_68.FIN2				20.79	4.5738	0.0851	6.46298	0.01311	5.41571	0.049959		83.9	4.5	82.9	5.2	102	95
13NB1_69.FIN2				9.4518	3.49716	4.65	6.02151	0.3233	5.25827	0.9089		1805	83	1758.4	50	1728.5	64
13NB1_70.FIN2				16.6945	6.34391	0.1589	7.55192	0.01951	6.15069	0.55647		124.5	7.9	149.3	11	600	130
13NB1_71.FIN2				18.2149	6.19308	0.118	7.88136	0.01595	5.76803	0.20481		102	5.8	112.8	8.4	350	120
13NB1_72.FIN2				21.0084	5.46218	0.0992	7.25806	0.0152	5.46053	0.01287		97.3	5.3	95.8	6.6	84	110
13NB1_73.FIN2				17.9533	5.74506	0.1657	7.8455	0.02097	6.19933	0.38898		133.7	7.9	154.5	11	414	120
13NB1_74.FIN2				21.1416	4.22833	0.0841	6.42093	0.01305	5.36398	0.39971		83.5	4.5	82.3	5.2	66	90
13NB1_75.FIN2				20.7469	4.14938	0.1093	6.3129	0.01674	5.31661	0.26238		107	5.6	105.3	6.2	110	83
13NB1_76.FIN2				21.0526	4.42105	0.0845	6.39053	0.01306	5.35988	0.052192		83.62	4.4	82.3	5.1	85	86
13NB1_77.FIN2				9.57763	3.54372	4.309	6.03388	0.3007	5.32092	0.78306		1696	78	1694.8	49	1704	65
13NB1_78.FIN2				20.4374	3.8831	0.1193	6.20285	0.0178	5.33708	0.49038		113.81	6	114.4	6.7	143	82
13NB1_79.FIN2				20.816	3.74688	0.1068	6.17978	0.01619	5.31192	0.3418		103.52	5.5	103.1	6	105	79
13NB1_80.FIN2				18.3824	5.14706	0.1162	6.97074	0.01576	5.32995	0.20482		100.81	5.3	111.2	7.3	333	97
13NB1_81.FIN2				9.30579	3.62926	4.864	6.16776	0.3311	5.43642	0.76904		1846	84	1798	51	1756	66
13NB1_82.FIN2				12.596	3.65285	2.248	6.22776	0.2067	5.32172	0.36969		1211.2	58	1196.3	42	1180	72
13NB1_83.FIN2				20.5973	3.91349	0.1138	6.23902	0.01693	5.31601	0.1169		108.21	5.7	109.6	6.4	129	83
13NB1_84.FIN2				20.9644	3.98323	0.0924	6.27706	0.01404	5.41311	0.3082		89.9	4.8	89.8	5.4	90	83
13NB1_85.FIN2				20.0803	4.61847	0.1178	6.70628	0.0172	5.34884	0.064847		109.9	5.8	112.9	7.1	164	88
13NB1_86.FIN2				19.7239	4.33925	0.1044	6.6092	0.01492	5.29491	0.31997		95.5	5	100.2	6.1	178	78
13NB1_87.FIN2				20.8333	4.16667	0.1095	6.48402	0.01645	5.34954	0.20823		105.2	5.6	105.7	6.3	98	92
13NB1_88.FIN2				21.2585	4.03912	0.0807	6.19579	0.012409	5.31872	0.16728		79.5	4.2	78.7	4.7	74	81
13NB1_89.FIN2				20.3791	3.87202	0.0922	6.18221	0.013742	5.31218	0.31652		87.99	4.6	89.5	5.3	145	84
13NB1_90.FIN2				21.3129	3.83632	0.1051	6.18459	0.01623	5.29883	0.17744		103.79	5.4	101.4	5.9	59	78
13NB1_91.FIN2				19.7239	4.14201	0.1064	6.29699	0.01522	5.32194	0.078964		97.4	5.1	102.8	6.1	218	84
13NB1_92.FIN2				19.7628	5.73123	0.1098	7.46812	0.01566	5.55556	0.11326		100.2	5.5	105.7	7.6	227	110
13NB1_93.FIN2				12.8535	3.59897	2.179	5.96604	0.2033	5.41072	0.66038		1192.7	58	1175.3	41	1141	72
13NB1_94.FIN2				19.4553	4.47471	0.1192	6.7953	0.01669	5.39245	0.62055		106.7	5.7	114	7.3	224	87
13NB1_95.FIN2				13.8122	4.00552	1.78	6.17978	0.1789	5.42202	0.2291		1062	54	1040	38	984	79
13NB1_96.FIN2				9.25926	3.51852	5.16	6.00775	0.3472	5.18433	0.78235		1921	88	1845.1	51	1767.4	65
13NB1_97.FIN2				19.5695	4.69667	0.1011	6.6271	0.01428	5.39216	0.08081		91.4	4.9	97.6	6.2	230	94
13NB1_98.FIN2				8.67604	3.55718	3.246	6.16143	0.2041	5.38951	0.93131		1197	58	1467.7	47	1883.3	63
13NB1_99.FIN2				19.6078	4.31373	0.1222	6.46481	0.0173	5.31792	0.23395		110.6	5.9	117.1	7.1	234	89
13NB1_100.FIN2				5.07099	3.5497	14.49	6.00414	0.5323	5.26019	0.85787		2750	120	2780.5	58	2803	57
Sample 13SR2
13SR2_1.FIN2				18.9394	4.16667	0.2047	6.35076	0.02797	5.36289	0.244		177.8	9.4	188.9	11	309	91
13SR2_2.FIN2				20.6186	3.91753	0.1503	6.18762	0.02237	5.36433	0.12689		142.6	7.5	142.2	8.1	132	82
13SR2_3.FIN2				20.0401	4.40882	0.1592	6.28141	0.02297	5.22421	0.21609		146.4	7.7	149.9	9.1	183	93
13SR2_4.FIN2				20.3211	4.06421	0.1696	6.48585	0.0249	5.22088	0.39773		158.5	8.3	158.9	9.2	138	75
13SR2_5.FIN2				20.5339	4.10678	0.1182	6.26058	0.0175	5.31429	0.090645		111.8	5.9	113	6.6	128	78
13SR2_6.FIN2				20	4.4	0.1918	6.25652	0.02779	5.39763	0.064366		176.7	9.3	177.7	11	165	86
13SR2_7.FIN2				20.5634	3.70142	0.1129	6.1116	0.01668	5.27578	0.26604		106.62	5.6	108.6	6.3	127	84
13SR2_8.FIN2				18.5529	5.00928	0.1167	7.02656	0.01581	5.4396	0.24793		101.1	5.5	112	7.5	345	110
13SR2_9.FIN2				19.9203	4.38247	0.1389	6.47948	0.01987	5.53598	0.14755		126.8	6.7	132	8.1	203	86
13SR2_10.FIN2				5.54631	3.6051	13.1	6.03053	0.5243	5.34045	0.68516		2719	120	2684	57	2655	58
13SR2_11.FIN2				20.4499	4.29448	0.173	6.35838	0.02568	5.45171	0.13036		163.5	8.6	161.9	9.6	148	90
13SR2_12.FIN2				19.6078	5.29412	0.1737	6.90846	0.02505	5.58882	0.013739		159.5	8.6	162.3	10	216	100
13SR2_13.FIN2				20.9205	4.1841	0.17	6.47059	0.02523	5.54895	0.32683		160.6	8.6	159.3	9.5	87	89
13SR2_14.FIN2				20.284	4.0568	0.1823	6.03401	0.02671	5.24148	0.011523		169.9	8.9	170	9.9	159	87
13SR2_15.FIN2				20.79	4.7817	0.1187	6.73968	0.01774	5.4115	0.029383		113.4	6.1	113.9	7.3	118	95
13SR2_16.FIN2				20.1207	4.62777	0.1111	6.57066	0.01616	5.38366	0.20075		103.3	5.5	106.8	6.7	171	92
13SR2_17.FIN2				20.8768	4.38413	0.1109	6.49234	0.01678	5.36353	0.068076		107.3	5.7	106.7	6.6	96	90
13SR2_18.FIN2				21.4592	4.72103	0.1383	6.72451	0.02116	5.19849	-0.0034171		134.9	7.2	131.1	8.3	46	90
13SR2_19.FIN2				19.4553	4.66926	0.1367	6.65691	0.01894	5.27983	0.16306		120.9	6.5	129.9	8.1	251	95
13SR2_20.FIN2				20	4.8	0.1232	6.81818	0.01777	5.34609	0.20119		113.5	6	117.9	7.5	188	96
13SR2_21.FIN2				20.0803	5.62249	0.1863	7.51476	0.02666	5.62641	0.24555		169.6	9.2	172.2	12	196	110
13SR2_22.FIN2				19.8807	5.36779	0.1981	7.06714	0.02892	5.5325	0.19824		183.8	9.8	183.1	12	201	110
13SR2_23.FIN2				20.4499	5.52147	0.1609	6.83654	0.02394	5.43024	0.055258		152.5	8.3	152	10	133	100
13SR2_24.FIN2				17.4216	4.70383	0.1461	6.84463	0.01827	5.41872	0.85523		116.7	6.3	138	9.1	463	99
13SR2_25.FIN2				20.3666	4.68432	0.1473	6.72098	0.02135	5.15222	0.31511		136.2	7.2	139.1	8.8	157	92
13SR2_26.FIN2				17.9533	8.43806	0.19	8.94737	0.02553	5.87544	0.07056		162.5	9.4	177	15	400	160
13SR2_27.FIN2				19.0114	5.51331	0.1865	7.5067	0.02577	5.43267	0.049758		164	8.8	172.5	11	278	110
13SR2_28.FIN2				21.0482	3.78868	0.1076	6.13383	0.016305	5.27446	0.019429		104.26	5.5	103.7	6	83	78
13SR2_29.FIN2				20.7039	4.14079	0.1062	6.40301	0.01584	5.30303	0.24781		101.3	5.3	102.3	6.2	123	85
13SR2_30.FIN2				20.9908	3.98825	0.1065	6.19718	0.0162	5.30864	0.058833		103.57	5.4	102.7	6	84	81
13SR2_31.FIN2				20.7039	4.14079	0.1193	6.28667	0.01803	5.32446	0.20799		115.17	6.1	114.3	6.8	116	83
13SR2_32.FIN2				19.2678	5.00963	0.1231	6.90496	0.01713	5.42907	0.10383		109.5	5.9	118.1	7.6	262	98
13SR2_33.FIN2				20.6186	4.94845	0.1468	6.81199	0.02208	5.43478	0.0031714		140.8	7.5	138.6	8.8	131	96
13SR2_34.FIN2				21.1864	4.44915	0.1013	6.5153	0.01563	5.3103	0.044323		99.94	5.3	98.2	6.2	77	87
13SR2_35.FIN2				19.2308	9.03846	0.186	9.67742	0.02599	5.77145	-0.001877		165.3	9.6	167	15	150	150
13SR2_36.FIN2				20.79	4.7817	0.148	6.75676	0.02192	5.47445	0.15475		139.8	7.4	139.6	8.9	118	93
13SR2_37.FIN2				21.4592	4.07725	0.0934	6.31692	0.01463	5.33151	0.11987		93.62	4.9	90.7	5.5	44	83
13SR2_38.FIN2				19.8413	4.36508	0.1361	6.46583	0.01978	5.56117	0.08593		126.3	6.7	129.6	7.9	211	89
13SR2_39.FIN2				20.6101	3.91591	0.1087	6.16375	0.016293	5.27834	0.13783		104.18	5.5	104.9	6.2	124	81
13SR2_40.FIN2				16.2338	4.70779	0.2518	6.75139	0.0296	5.40541	0.10136		188.1	9.9	227.7	14	632	100
13SR2_41.FIN2				20.3666	4.07332	0.0986	6.28803	0.014643	5.25849	0.082086		93.71	4.9	95.4	5.7	147	83
13SR2_42.FIN2				15.748	5.03937	0.151	7.28477	0.01725	5.33333	0.28082		110.25	5.8	142.1	9.4	673	100
13SR2_43.FIN2				19.9203	5.17928	0.1307	6.886	0.01885	5.30504	-0.011672		120.4	6.4	124.6	8.2	200	100
13SR2_44.FIN2				20.8333	5.41667	0.1468	7.49319	0.02212	5.42495	0.037895		141	7.5	138.8	9.3	115	100
13SR2_45.FIN2				20.6186	4.12371	0.1716	6.41026	0.02584	5.41796	0.24075		164.5	8.6	160.7	9.4	124	86
13SR2_46.FIN2				14.0647	5.76653	0.1589	7.55192	0.01609	5.34493	0.2376		102.9	5.5	148.6	10	876	120
13SR2_47.FIN2				20.2184	4.04367	0.1972	6.08519	0.02911	5.15287	0.15694		185	9.6	182.5	10	171	84
13SR2_48.FIN2				20.202	4.44444	0.1751	6.28212	0.02584	5.41796	0.2791		164.4	8.8	163.7	9.7	175	90
13SR2_49.FIN2				20.7426	3.73367	0.0981	6.11621	0.01485	5.31987	0.23917		95.02	5	95	5.6	112	79
13SR2_50.FIN2				21.097	5.27426	0.0994	6.94165	0.01552	5.41237	-0.013467		99.2	5.3	96	6.4	69	97
13SR2_51.FIN2				20.8117	3.7461	0.1081	6.19796	0.01649	5.27592	0.25595		105.43	5.5	104.2	6.1	109	80
13SR2_52.FIN2				20.0401	4.20842	0.1685	6.52819	0.02478	5.24617	0.18519		157.8	8.3	158.1	9.3	180	81
13SR2_53.FIN2				19.3424	4.64217	0.1771	6.77583	0.02537	5.51833	0.13432		161.7	8.5	165	10	235	87
13SR2_54.FIN2				13.089	5.89005	0.1869	7.49064	0.01774	5.4115	0.1977		113.3	6.1	172.4	12	1020	130
13SR2_55.FIN2				20.1572	4.03145	0.1666	6.0024	0.02481	5.23982	0.11174		158	8.3	156.3	9	169	83
13SR2_56.FIN2				20.7469	4.35685	0.0998	6.41283	0.01533	5.34899	-0.027037		98.08	5.2	96.7	6	125	89
13SR2_57.FIN2				21.0084	4.20168	0.1432	6.42458	0.02217	5.41272	0.16299		141.4	7.4	135.6	8.1	86	83
13SR2_58.FIN2				20.6356	3.7144	0.0999	6.10611	0.015179	5.27044	0.1283		97.11	5.1	96.8	5.6	121	81
13SR2_59.FIN2				20.2429	4.25101	0.1124	6.40569	0.01686	5.33808	0.091602		107.8	5.7	108.2	6.6	166	88
13SR2_60.FIN2				19.3798	4.45736	0.3359	6.54957	0.04716	5.3011	0.3029		297	16	293.8	17	266	91
13SR2_61.FIN2				21.692	4.33839	0.0983	6.51068	0.01566	5.30013	0.16404		100.19	5.3	95.3	5.9	29	85
13SR2_62.FIN2				20.8203	3.95586	0.0926	6.15551	0.01423	5.34083	0.21973		91.07	4.8	89.9	5.3	106	80
13SR2_63.FIN2				19.2493	3.84986	0.1089	6.15243	0.0154	5.25974	0.15776		98.49	5.2	105.1	6	272	85
13SR2_64.FIN2				20.8768	4.17537	0.0968	6.19835	0.01508	5.30504	-0.016537		96.47	5.1	93.9	5.5	96	85
13SR2_65.FIN2				20.8333	4.79167	0.1513	6.60939	0.02348	5.53663	0.1477		149.6	8	142.5	9.1	102	93
13SR2_66.FIN2				20.8333	4.16667	0.1397	6.37079	0.02142	5.13539	0.10682		136.63	7.2	132.6	7.9	106	83
13SR2_67.FIN2				19.6696	3.54052	0.2276	6.15114	0.03284	5.17661	0.35636		208.3	11	208.1	11	231	84
13SR2_68.FIN2				20.6186	3.71134	0.0961	6.13944	0.014701	5.30576	0.17218		94.08	4.9	93.2	5.4	124	80
13SR2_69.FIN2				15.0376	6.61654	0.228	8.33333	0.02578	5.43057	0.2661		164	8.9	208	16	700	130
13SR2_70.FIN2				21.097	4.21941	0.1006	6.36183	0.01573	5.34011	0.14706		100.6	5.3	97.5	5.9	84	83
13SR2_71.FIN2				20.6313	3.91995	0.1013	6.12043	0.01549	5.29374	0.17084		99.08	5.2	97.9	5.7	124	81
13SR2_72.FIN2				20.8725	3.75704	0.0995	6.13065	0.01522	5.32194	0.20076		97.37	5.1	96.3	5.6	91	82
13SR2_73.FIN2				20.9776	3.77596	0.1083	6.18652	0.01675	5.31343	0.24109		107.08	5.6	104.3	6.1	90	79
13SR2_74.FIN2				21.097	3.79747	0.1115	6.18834	0.01728	5.32407	0.20513		110.42	5.8	107.2	6.3	82	80
13SR2_75.FIN2				20.6186	3.71134	0.1413	6.15711	0.02165	5.08083	0.26115		138.08	7.2	134.3	7.6	124	80
13SR2_76.FIN2				20.5761	4.32099	0.145	6.41379	0.02186	5.48948	0.18339		139.4	7.4	137.2	8.2	132	84
13SR2_77.FIN2				19.6618	3.93236	0.1121	6.15522	0.01624	5.29557	0.09366		103.82	5.5	107.9	6.3	228	85
13SR2_78.FIN2				19.8807	4.37376	0.124	6.53226	0.0182	5.32967	0.15036		116.3	6.1	119.4	7.4	214	92
13SR2_79.FIN2				20.6612	4.54545	0.112	6.51786	0.01698	5.30035	0.043445		108.54	5.7	107.5	6.7	134	88
13SR2_80.FIN2				10.4603	5.96234	0.208	7.69231	0.0159	5.22013	0.089156		101.67	5.3	191.8	13	1510	110
13SR2_81.FIN2				20.8073	3.95339	0.1008	6.15079	0.01535	5.27687	0.14297		98.17	5.2	97.6	5.7	112	84
13SR2_82.FIN2				20.4499	4.29448	0.2003	6.49026	0.02994	5.34402	0.16013		190.2	10	185.3	11	137	86
13SR2_83.FIN2				19.7239	4.93097	0.1645	6.68693	0.02395	5.42797	0.06129		152.6	8.1	154	9.8	205	96
13SR2_84.FIN2				20.2716	3.85161	0.1492	6.0992	0.02221	5.40297	0.123		141.62	7.4	141.4	7.9	162	84
13SR2_85.FIN2				20.8768	5.01044	0.1475	6.77966	0.02277	5.27009	-0.10065		145.1	7.7	139.9	8.8	112	96
13SR2_86.FIN2				21.173	3.81114	0.0996	6.1245	0.015405	5.25803	0.13895		98.55	5.2	96.4	5.6	68	78
13SR2_87.FIN2				19.6464	4.71513	0.1195	6.69456	0.0171	5.38012	0.21944		109.3	5.8	114.3	7.2	220	93
13SR2_88.FIN2				19.4553	4.28016	0.3061	6.53381	0.04369	5.26436	0.17787		275.7	14	270.2	15	239	89
13SR2_89.FIN2				17.9211	5.91398	0.1719	7.56254	0.02241	5.35475	0.075599		142.9	7.6	159.8	11	372	120
13SR2_90.FIN2				20.674	3.72131	0.105	6.09524	0.0159	5.28302	0.41165		101.7	5.3	101.4	5.9	117	80
13SR2_91.FIN2				19.972	3.99441	0.1465	6.2116	0.02141	5.13779	0.040906		136.57	7.2	138.7	8	195	82
13SR2_92.FIN2				20.79	4.9896	0.1034	6.76983	0.0157	5.35032	-0.025347		100.4	5.3	99.6	6.4	114	95
13SR2_93.FIN2				20.3252	5.4878	0.1645	7.29483	0.02392	5.43478	0.10719		152.4	8.2	154.6	11	164	110
13SR2_94.FIN2				19.9442	3.78939	0.1482	6.07287	0.02156	5.10204	0.28679		137.52	7.2	140.2	8	197	84
13SR2_95.FIN2				10.0806	7.25806	0.281	9.60854	0.02068	5.31915	0.77878		131.9	7.2	245	20	1470	130
13SR2_96.FIN2				20.6186	5.15464	0.1808	7.19027	0.02698	5.55967	0.067542		171.6	9.2	168.3	11	110	99
13SR2_97.FIN2				20.1207	4.42656	0.1705	6.45161	0.02519	5.16078	0.17603		160.3	8.4	159.4	9.7	175	91
13SR2_98.FIN2				19.8807	5.16899	0.1107	6.95574	0.01603	5.36494	0.074919		102.5	5.5	106.2	7.1	189	99
13SR2_99.FIN2				20.6186	5.36082	0.115	7.04348	0.01731	5.37262	0.029092		110.6	5.9	110.8	7.4	128	100
13SR2_100.FIN2				21.2766	4.25532	0.1138	6.59051	0.01761	5.39466	0.3583		112.5	6	109.3	6.8	66	85
Sample 13DR1
13DR1_1.FIN2				17.3913	5.04348	0.169	8.28402	0.02011	5.46992	0.88195		128.3	6.9	152.1	10	421	87
13DR1_3.FIN2				19.7239	3.94477	0.1769	6.2182	0.02543	5.50531	0.31201		161.9	8.5	165.6	9.6	222	85
13DR1_5.FIN2				17.0068	7.31293	0.177	9.60452	0.02139	5.6101	0.56877		136.4	7.3	162	13	380	130
13DR1_6.FIN2				20.5761	4.52675	0.1912	6.79916	0.02835	5.29101	0.25161		180.2	9.5	177	11	141	92
13DR1_7.FIN2				21.1416	4.65116	0.1183	6.59341	0.01796	5.34521	0.069824		114.7	6.1	113.6	7	88	89
13DR1_8.FIN2				20.9205	5.23013	0.1191	6.96893	0.01787	5.37213	0.072588		114.2	6.1	114.5	7.5	100	99
13DR1_9.FIN2				20.0401	4.40882	0.1291	6.50658	0.0187	5.34759	0.16681		119.5	6.3	123.2	7.5	188	90
13DR1_10.FIN2				20.0401	4.20842	0.1232	6.49351	0.01789	5.31023	0.32421		114.31	6	118	7.3	182	87
13DR1_11.FIN2				20.9205	4.81172	0.1216	6.82566	0.01834	5.34351	0.013506		117.1	6.2	116.2	7.5	102	88
13DR1_12.FIN2				20.202	4.44444	0.1304	6.5184	0.019	5.26316	0.12281		121.3	6.4	124.2	7.6	163	90
13DR1_13.FIN2				20.284	5.07099	0.1614	6.81537	0.0235	5.53191	0.091973		149.7	8	151.4	9.5	176	97
13DR1_14.FIN2				16.2311	3.73316	1.003	6.08175	0.11738	5.28199	0.20001		715.4	36	706	30	659	79
13DR1_15.FIN2				21.097	4.64135	0.1228	6.67752	0.01867	5.35619	0.19738		119.2	6.3	117	7.3	87	86
13DR1_16.FIN2				20.803	3.95257	0.1486	6.25841	0.02216	5.41516	0.089302		141.3	7.4	140.5	8.2	108	81
13DR1_17.FIN2				20.3666	4.68432	0.1269	6.61939	0.01862	5.37057	0.045484		118.9	6.3	121.1	7.6	158	96
13DR1_18.FIN2				20.5339	4.31211	0.1209	6.28619	0.01758	5.40387	0.23416		112.4	6	115.8	6.9	135	89
13DR1_19.FIN2				11.8343	3.90533	2.914	6.17708	0.2508	5.58214	0.67081		1441	70	1384	48	1293	76
13DR1_20.FIN2				21.4133	5.99572	0.121	7.52066	0.01857	5.38503	-0.042469		118.6	6.4	115.6	8.2	68	110
13DR1_21.FIN2				20.3252	4.26829	0.1254	6.37959	0.01813	5.29509	0.10642		115.82	6.1	119.8	7.2	168	88
13DR1_23.FIN2				20.6058	4.12116	0.1391	6.25449	0.02062	5.33463	0.15837		131.5	6.9	132.5	7.8	142	85
13DR1_24.FIN2				12.285	3.80835	2.073	6.2711	0.1821	5.27183	0.32505		1078.3	53	1137	41	1220	73
13DR1_25.FIN2				17.9533	4.12926	0.1801	6.66297	0.02313	5.18807	0.52643		147.4	7.8	168.4	10	438	88
13DR1_26.FIN2				20.9688	3.98406	0.1255	6.21514	0.01881	5.31632	0.051415		120.12	6.3	120	7.1	86	84
13DR1_27.FIN2				16.5017	4.78548	0.1589	6.92259	0.01859	5.37924	0.080475		118.7	6.3	149.1	9.6	557	99
13DR1_28.FIN2				20.9205	4.60251	0.1259	6.59253	0.01875	5.33333	0.010895		119.7	6.3	120.7	7.4	102	90
13DR1_30.FIN2				14.2045	4.97159	0.1895	6.86016	0.01921	5.20562	0.31642		122.6	6.6	176.6	12	919	100
13DR1_31.FIN2				18.9036	5.29301	0.187	6.95187	0.02524	5.54675	0.15531		160.7	8.6	173.6	11	291	100
13DR1_32.FIN2				20.1207	4.02414	0.1388	6.26801	0.02001	5.49725	-0.0087162		127.69	6.7	131.8	7.8	168	82
13DR1_33.FIN2				6.86342	3.56898	8.981	6.01269	0.4416	5.43478	0.65364		2357	110	2337.8	56	2294	63
13DR1_34.FIN2				20.2429	4.45344	0.1602	6.86642	0.02283	5.25624	0.33581		145.5	7.8	150.7	9.2	172	96
13DR1_37.FIN2				19.4553	5.25292	0.166	7.22892	0.02316	5.61313	0.25175		147.8	8.1	155.5	10	242	100
13DR1_38.FIN2				16.1812	4.36893	0.2305	6.50759	0.02677	5.60329	0.52494		170.3	9.2	210.1	13	666	94
13DR1_39.FIN2				18.6916	4.29907	0.2143	6.5329	0.02847	5.2687	0.51317		181	9.6	196.5	12	329	88
13DR1_40.FIN2				20.9908	3.98825	0.1249	6.16493	0.01883	5.31067	0.17864		120.24	6.3	119.5	6.9	85	80
13DR1_41.FIN2				20.4666	3.684	0.1264	6.09177	0.01859	5.27165	0.35196		118.82	6.2	120.7	7	140	80
13DR1_42.FIN2				11.2613	7.54505	0.222	9.00901	0.01798	5.33927	0.1804		114.9	6.1	196.7	12	1180	120
13DR1_43.FIN2				20.6186	4.12371	0.12	6.25	0.01786	5.31915	0.2078		114.1	6	115.3	6.7	123	83
13DR1_44.FIN2				20.5128	3.89744	0.1119	6.16622	0.01642	5.29842	0.25687		105	5.5	107.8	6.3	140	83
13DR1_45.FIN2				19.1571	4.02299	0.1196	6.35452	0.01654	5.32044	0.50877		105.76	5.6	114.6	6.9	281	88
13DR1_46.FIN2				20.5002	3.69004	0.1202	6.07321	0.017721	5.24801	0.25419		113.23	5.9	115.2	6.6	134	81
13DR1_47.FIN2				20.2799	3.85317	0.1246	6.17978	0.01809	5.3068	0.1079		115.56	6.1	119.1	7	155	79
13DR1_48.FIN2				20.7039	4.34783	0.1203	6.48379	0.01778	5.34308	0.11597		113.58	6	115.6	6.9	119	90
13DR1_49.FIN2				20.4499	4.29448	0.1545	6.47249	0.02285	5.25164	0.10828		145.6	7.6	145.6	8.7	140	86
13DR1_50.FIN2				20.6271	3.91914	0.1455	6.11684	0.02167	5.07614	0.19496		138.21	7.2	137.9	7.9	115	83
13DR1_51.FIN2				19.1571	4.21456	0.1277	6.26468	0.01781	5.27793	0.12485		113.81	6	122.4	7.2	296	88
13DR1_52.FIN2				20.8333	4.375	0.144	6.45833	0.02185	5.49199	0.18279		139.3	7.3	136.6	8.3	106	85
13DR1_53.FIN2				9.01063	3.51415	4.808	6.03161	0.3141	5.41229	0.70488		1761.3	81	1786.9	51	1815.2	64
13DR1_56.FIN2				19.6464	5.10806	0.1295	7.02703	0.01824	5.37281	0.14042		116.5	6.2	123.5	8.1	211	100
13DR1_57.FIN2				20.842	3.95998	0.1154	6.23917	0.01738	5.29344	0.19684		111	5.8	110.7	6.5	104	82
13DR1_58.FIN2				20.1735	3.63123	0.162	6.04938	0.02372	5.48061	0.19951		151.1	7.9	152.6	8.4	173	83
13DR1_59.FIN2				10.9769	3.84193	3.37	6.23145	0.2686	5.21221	0.48157		1533	73	1497	49	1447	74
13DR1_60.FIN2				20.9205	4.39331	0.1117	6.53536	0.01693	5.37507	0.1619		108.2	5.8	107.4	6.7	107	93
13DR1_62.FIN2				20.3915	3.67047	0.1622	6.10358	0.02419	5.37412	0.37037		154.1	8.1	153	8.4	147	81
13DR1_63.FIN2				20.0763	3.61373	0.1264	6.01266	0.01849	5.30016	0.5548		118.11	6.2	120.8	6.9	183	81
13DR1_64.FIN2				20.1005	3.8191	0.1658	6.03136	0.02424	5.36304	0.20507		154.4	8.1	155.6	8.9	174	82
13DR1_65.FIN2				9.6918	3.58597	4.331	6.00323	0.3065	5.22023	0.55251		1723.2	80	1699.4	49	1681.2	66
13DR1_66.FIN2				20.5255	3.89984	0.1338	6.20329	0.01986	5.53877	0.16101		126.74	6.7	127.4	7.4	139	82
13DR1_67.FIN2				18.9358	3.97652	0.1383	6.29067	0.01901	5.26039	0.19184		121.4	6.4	131.4	7.7	303	85
13DR1_68.FIN2				19.2308	5.76923	0.1587	7.56144	0.02264	5.30035	-0.020765		144.3	7.8	148.6	10	198	100
13DR1_69.FIN2				19.9203	3.98406	0.1307	6.27391	0.01913	5.22739	0.025723		122.2	6.4	124.8	7.4	201	86
13DR1_70.FIN2				20.5339	4.10678	0.1174	6.30324	0.01756	5.29613	0.11402		112.24	5.9	112.6	6.8	133	84
13DR1_71.FIN2				20.8333	4.16667	0.1305	6.36015	0.0197	5.07614	0.22615		125.8	6.6	124.8	7.3	112	84
13DR1_72.FIN2				18.8324	4.89642	0.1465	6.75768	0.02012	5.4672	0.028289		128.4	6.8	138	8.7	303	96
13DR1_73.FIN2				21.0084	4.41176	0.1142	6.47986	0.01737	5.29649	0.1454		110.99	5.9	110	6.9	99	88
13DR1_74.FIN2				19.5312	4.10156	0.1822	6.03732	0.02604	5.37634	0.14469		165.7	8.7	169.7	9.8	241	85
13DR1_75.FIN2				20.9205	4.1841	0.1236	6.39159	0.01883	5.31067	0.12753		120.3	6.4	118.1	7.1	102	84
13DR1_76.FIN2				20.4374	3.67872	0.1286	6.06532	0.01911	5.23286	0.32331		122	6.4	122.8	7	141	82
13DR1_77.FIN2				21.5054	4.51613	0.114	6.57895	0.01793	5.29838	0.03137		114.5	6	109.6	6.7	56	88
13DR1_78.FIN2				18.7617	4.69043	0.1632	6.7402	0.02225	5.39326	0.31461		142.1	7.8	153.3	9.5	328	100
13DR1_79.FIN2				20.6186	4.74227	0.1331	6.6867	0.02016	5.45635	0.011132		128.7	6.8	126.5	8	125	91
13DR1_80.FIN2				20.4499	4.70348	0.124	6.69355	0.01848	5.35714	0.17729		118.1	6.3	118.6	7.4	148	93
13DR1_81.FIN2				21.097	4.21941	0.1185	6.4135	0.01834	5.34351	0.11381		117.18	6.2	113.8	6.9	80	83
13DR1_82.FIN2				20.3666	4.27699	0.1599	6.25391	0.02369	5.48755	0.10279		150.9	7.9	150.9	9	157	87
13DR1_83.FIN2				18.4162	4.78821	0.13	6.76923	0.01758	5.2901	0.15801		112.34	5.9	123.7	7.8	357	98
13DR1_84.FIN2				20.4082	4.69388	0.1264	6.8038	0.01889	5.29381	0.10446		120.7	6.4	121.6	7.8	159	95
13DR1_85.FIN2				21.0526	4.63158	0.1201	6.66112	0.01872	5.34188	0.025459		119.6	6.3	115.1	7.3	94	91
13DR1_86.FIN2				21.3675	5.98291	0.1158	7.51295	0.0183	5.46448	0.094216		116.9	6.4	111.6	8	74	110
13DR1_87.FIN2				18.6567	4.85075	0.1462	6.83995	0.01998	5.50551	0.47872		127.6	6.8	137.3	8.7	304	94
13DR1_88.FIN2				20.3666	4.07332	0.129	6.27907	0.01922	5.20291	-0.07371		122.74	6.4	123	7.3	147	83
13DR1_90.FIN2				12.4054	3.59757	2.119	6.13497	0.19177	5.21458	0.6519		1131.2	54	1155.1	41	1213	69
13DR1_91.FIN2				19.4553	4.0856	0.2665	6.37899	0.03793	5.27287	0.23757		240	13	240.5	13	264	90
13DR1_92.FIN2				13.7363	3.57143	1.839	5.98151	0.1843	5.31742	0.64816		1090.4	53	1059.6	40	1010	72
13DR1_93.FIN2				20.202	4.0404	0.1191	6.29723	0.01743	5.33563	0.19717		111.36	5.9	114.2	6.8	172	86
13DR1_94.FIN2				20.4082	4.28571	0.1144	6.29371	0.01699	5.29723	0.035247		108.62	5.7	109.9	6.6	149	90
13DR1_95.FIN2				20.9205	5.23013	0.1144	7.16783	0.0174	5.4023	0.18201		111.2	5.9	109.7	7.5	106	100
13DR1_96.FIN2				20.6186	4.12371	0.1284	6.23053	0.01929	5.18403	0.0071183		123.18	6.5	122.7	7.2	135	84
13DR1_97.FIN2				20.6228	3.91833	0.1216	6.25	0.01822	5.32382	0.17598		116.38	6.1	116.4	6.9	124	82
13DR1_99.FIN2				13.151	3.68227	1.898	6.32244	0.1823	5.3209	0.25569		1080	52	1079.7	40	1091	73
13DR1_100.FIN2				20.1369	3.82602	0.1719	6.39907	0.02523	5.1526	0.17814		160.6	8.4	161.1	9.1	174	82
Sample 13DR3
13DR3_1.FIN2				21.0526	4	0.1256	6.28981	0.01922	5.20291	0.059221		122.71	6.4	120.2	7.1	84	81
13DR3_3.FIN2				20.1248	3.82371	0.1086	6.16943	0.015866	5.29434	0.16624		101.47	5.3	105	6.1	181	86
13DR3_4.FIN2				19.9203	4.18327	0.1391	6.25449	0.02025	5.4321	0.063304		129.2	6.8	132.1	7.8	194	85
13DR3_5.FIN2				20.284	4.86815	0.1341	6.63684	0.0196	5.10204	-0.037645		125.1	6.6	127.5	8	156	98
13DR3_6.FIN2				21.1416	4.01691	0.1207	6.37945	0.01848	5.30303	0.20843		118.01	6.2	115.8	6.9	77	82
13DR3_7.FIN2				20	4.2	0.1145	6.46288	0.01661	5.29801	0.35521		106.21	5.6	110.1	6.7	201	89
13DR3_8.FIN2				8.93655	3.75335	4.123	6.30609	0.2728	5.8651	0.98095		1550	83	1648	60	1811	41
13DR3_9.FIN2				20.5339	4.31211	0.1376	6.46802	0.02047	5.37372	0.19758		130.6	6.9	130.7	7.9	130	86
13DR3_10.FIN2				20.1735	3.83296	0.1321	6.13172	0.01922	5.20291	0.052285		122.73	6.4	126	7.3	173	83
13DR3_12.FIN2				20	4.2	0.1197	6.43275	0.01733	5.30871	0.20578		110.75	5.8	114.7	6.9	188	89
13DR3_13.FIN2				20.7727	3.73909	0.1075	6.13953	0.016112	5.27557	0.1348		103.04	5.4	103.7	5.9	108	79
13DR3_15.FIN2				20.3252	5.0813	0.1366	6.8082	0.01973	5.57527	-0.012685		125.9	6.7	130.2	8.2	160	94
13DR3_16.FIN2				21.0084	4.41176	0.1144	6.46853	0.01719	5.29378	0.17376		109.88	5.8	109.8	6.7	97	87
13DR3_17.FIN2				20.2306	4.04613	0.1372	6.19534	0.02026	5.42942	0.1204		129.27	6.8	130.8	7.6	157	84
13DR3_18.FIN2				18.1488	4.53721	0.1497	6.68003	0.01953	5.12033	0.669		124.7	6.6	141.1	9	389	95
13DR3_19.FIN2				20.6398	3.71517	0.1314	6.08828	0.01948	5.13347	0.26963		124.34	6.5	125.3	7.1	120	80
13DR3_20.FIN2				20.475	4.095	0.1304	6.21166	0.01925	5.19481	0.10237		122.91	6.4	124.4	7.3	138	85
13DR3_21.FIN2				21.0084	4.83193	0.1194	6.70017	0.01814	5.3473	0.21572		115.9	6.1	114.8	7.4	101	93
13DR3_22.FIN2				20.5761	5.14403	0.1236	6.95793	0.01811	5.35616	-0.032678		115.7	6.1	117.9	7.7	134	97
13DR3_23.FIN2				20.6612	4.54545	0.1309	6.64629	0.01938	5.15996	0.077594		123.7	6.5	124.3	7.7	124	88
13DR3_25.FIN2				20.7469	4.14938	0.111	6.30631	0.0165	5.33333	0.13939		105.49	5.5	106.9	6.3	111	83
13DR3_27.FIN2				20.5804	3.91027	0.131	6.18321	0.01922	5.20291	0.15382		122.75	6.4	124.9	7.2	132	81
13DR3_28.FIN2				20.3252	4.47154	0.1263	6.49248	0.01864	5.31116	-0.029291		119.1	6.3	120.5	7.4	159	90
13DR3_29.FIN2				19.992	3.9984	0.1368	6.21345	0.01948	5.13347	0.26249		124.39	6.5	130	7.6	203	86
13DR3_30.FIN2				19.2678	4.4316	0.1395	6.5233	0.01921	5.20562	0.056285		122.7	6.5	132.3	8.1	265	93
13DR3_31.FIN2				20.4499	5.52147	0.1284	7.16511	0.01882	5.3135	-0.0064114		120.2	6.4	122.4	8.2	148	100
13DR3_32.FIN2				20.4834	4.09668	0.1039	6.25602	0.01541	5.32122	0.11485		98.56	5.2	100.3	6	135	86
13DR3_33.FIN2				20.6484	3.92319	0.1424	6.17978	0.0212	5.18868	0.20875		135.2	7.1	135.1	7.8	115	82
13DR3_34.FIN2				20.8117	3.95421	0.1135	6.1674	0.01699	5.29723	0.047003		108.59	5.7	109.1	6.4	109	81
13DR3_35.FIN2				20.6186	4.12371	0.1204	6.22924	0.01781	5.33408	0.14138		113.78	6	115.3	6.8	125	83
13DR3_38.FIN2				20.1613	4.03226	0.1432	6.21508	0.02097	5.24559	0.16632		133.76	7	136	7.9	176	84
13DR3_39.FIN2				17.8253	4.27807	0.1493	6.22907	0.01941	5.15198	-0.14924		123.9	6.5	141.3	8.3	430	92
13DR3_40.FIN2				20.5761	4.93827	0.1296	6.79012	0.01947	5.13611	0.02415		124.3	6.6	123.7	8	129	96
13DR3_41.FIN2				16.4204	4.10509	0.1636	6.11247	0.01943	5.14668	0.18082		124.07	6.5	153.6	9	637	89
13DR3_42.FIN2				20.0803	4.61847	0.1335	6.51685	0.01969	5.07872	0.062044		125.7	6.6	127.3	7.9	194	92
13DR3_43.FIN2				20.8768	5.63674	0.1218	7.30706	0.01838	5.4407	0.02396		117.6	6.3	116.5	8.1	133	110
13DR3_44.FIN2				21.1864	5.08475	0.1282	6.86427	0.01978	5.56117	-0.047081		126.3	6.7	122.1	7.9	77	95
13DR3_45.FIN2				20.4918	4.5082	0.1175	6.55319	0.01774	5.35513	0.037405		113.4	6	112.8	6.9	133	90
13DR3_46.FIN2				20.7469	4.56432	0.1354	6.64697	0.02057	5.34759	0.14798		131.3	6.9	128.9	8	116	91
13DR3_47.FIN2				20.7039	4.34783	0.1257	6.52347	0.01877	5.32765	0.18298		119.9	6.4	120.1	7.4	112	89
13DR3_48.FIN2				20.9644	3.98323	0.1279	6.25489	0.01948	5.13347	0.039886		124.38	6.5	122.1	7.2	96	82
13DR3_49.FIN2				17.0068	4.2517	0.1616	6.18812	0.02	5.5	0.17472		127.6	6.7	152.1	8.9	542	90
13DR3_51.FIN2				20.7943	3.95093	0.1321	6.20742	0.02008	5.47809	0.11406		128.18	6.7	125.9	7.4	111	83
13DR3_52.FIN2				15.625	5.46875	0.143	6.99301	0.01642	5.42022	0.24239		105	5.6	135	9.1	685	110
13DR3_54.FIN2				15.528	6.67702	0.202	8.41584	0.02277	5.27009	0.53279		145.1	7.8	184	14	590	120
13DR3_55.FIN2				20.5339	4.92813	0.1324	6.79758	0.01973	5.57527	0.046096		125.9	6.7	126.1	8	136	96
13DR3_56.FIN2				20.9644	4.40252	0.1211	6.52353	0.01853	5.34269	-0.0092902		118.3	6.3	116.3	7	89	86
13DR3_58.FIN2				20.1045	4.02091	0.1343	6.25465	0.01982	5.04541	0.24919		126.51	6.6	127.9	7.5	176	84
13DR3_59.FIN2				16.9492	4.57627	0.1264	6.72468	0.01577	5.38998	0.41041		100.9	5.4	120.7	7.7	543	99
13DR3_60.FIN2				18.9753	3.98482	0.1454	6.2586	0.02034	5.40806	0.30473		129.82	6.8	137.9	8	307	88
13DR3_61.FIN2				20.6186	4.94845	0.1218	6.97865	0.01852	5.39957	0.26687		118.3	6.3	116.3	7.6	135	96
13DR3_62.FIN2				20.79	4.3659	0.1155	6.40693	0.01751	5.31125	0.17176		111.89	5.9	110.8	6.8	114	87
13DR3_63.FIN2				21.0084	4.83193	0.1025	6.73171	0.0158	5.37975	-0.06702		101	5.4	98.9	6.4	92	94
13DR3_64.FIN2				20.3666	4.27699	0.1096	6.29562	0.01622	5.3021	-0.017781		103.72	5.5	105.5	6.3	154	89
13DR3_65.FIN2				20	4.6	0.1658	6.6345	0.02404	5.40765	0.122		153.1	8.2	155.9	9.6	206	96
13DR3_66.FIN2				20.5423	3.90304	0.1684	6.53207	0.02552	5.48589	0.65224		162.4	8.8	157.7	9.3	130	81
13DR3_67.FIN2				19.5695	4.30528	0.199	6.53266	0.02826	5.30786	0.17631		179.6	9.6	184.2	11	254	100
13DR3_68.FIN2				21.097	5.48523	0.1179	7.2095	0.01831	5.4615	0.082815		117	6.3	112.9	7.7	87	110
13DR3_69.FIN2				21.0084	4.20168	0.1175	6.38298	0.01803	5.32446	0.14711		115.19	6.1	112.8	6.7	97	84
13DR3_70.FIN2				20.6612	4.33884	0.1378	6.5312	0.02079	5.29101	0.31923		132.7	7	131.3	7.9	123	92
13DR3_71.FIN2				20.7039	4.7619	0.1255	6.69323	0.01888	5.29661	0.13199		120.5	6.4	119.7	7.5	109	90
13DR3_72.FIN2				20.79	5.19751	0.1095	7.03196	0.01663	5.41191	0.13861		106.3	5.7	105.2	7.1	112	99
13DR3_73.FIN2				20.4918	4.71311	0.1383	6.72451	0.02058	5.345	-0.0031996		131.3	6.9	131.2	8.3	144	96
13DR3_74.FIN2				20.9644	4.8218	0.1263	6.65083	0.01938	5.15996	0.01307		123.7	6.6	120.4	7.6	102	92
13DR3_76.FIN2				20.004	3.80076	0.1114	6.10413	0.016214	5.30406	0.11721		103.68	5.4	107.3	6.2	189	82
13DR3_77.FIN2				20.6186	4.74227	0.1485	6.73401	0.02235	5.36913	0.11621		142.5	7.6	140.3	8.8	126	94
13DR3_78.FIN2				19.8807	5.5666	0.1529	7.19424	0.02217	5.41272	0.15994		141.4	7.6	144.3	9.7	195	110
13DR3_80.FIN2				20.6612	4.75207	0.1285	6.77043	0.01934	5.17063	0.092421		123.5	6.6	122.7	7.7	120	94
13DR3_81.FIN2				20.79	4.7817	0.1227	6.76447	0.01863	5.31401	0.030966		119	6.3	117.5	7.5	106	94
13DR3_82.FIN2				20.5761	4.52675	0.1187	6.57119	0.01787	5.31617	0.080729		114.2	6	113.6	7.1	121	86
13DR3_83.FIN2				19.6078	4.70588	0.142	6.69014	0.02041	5.38951	0.15883		130.3	6.9	135.1	8.6	237	96
13DR3_84.FIN2				16.1812	5.33981	0.1429	7.69769	0.01664	5.34856	0.45072		106.4	5.6	134.7	9.4	609	110
13DR3_85.FIN2				20.5423	3.69762	0.1157	6.05013	0.017381	5.29314	0.31688		111.08	5.8	111.18	6.3	128	81
13DR3_86.FIN2				17.0068	5.10204	0.1305	7.12644	0.01624	5.35714	0.28298		103.85	5.5	124	8.3	500	110
13DR3_87.FIN2				14.0449	7.30337	0.195	8.71795	0.02027	5.42674	0.30584		129.4	7.2	179	14	930	140
13DR3_88.FIN2				20.2429	5.26316	0.1362	7.04846	0.02016	5.45635	0.34624		128.7	6.8	129.3	8.6	152	100
13DR3_89.FIN2				19.685	4.52756	0.1225	6.53061	0.01751	5.36836	0.045427		112	6	117.1	7.2	232	92
13DR3_90.FIN2				20.8768	4.17537	0.112	6.33929	0.01699	5.29723	0.066275		108.63	5.7	107.6	6.5	106	84
13DR3_91.FIN2				17.2414	4.31034	0.1503	6.45376	0.01883	5.31067	0.1227		120.3	6.4	142.4	8.5	503	95
13DR3_92.FIN2				19.1131	3.82263	0.1414	6.15276	0.01954	5.11771	0.10967		124.75	6.5	134.2	7.7	290	84
13DR3_93.FIN2				20.4918	3.68852	0.1177	6.03229	0.01763	5.2751	0.36328		112.68	5.9	112.9	6.4	134	81
13DR3_94.FIN2				21.0526	4.42105	0.1278	6.57277	0.0195	5.12821	0.16603		124.5	6.6	122.3	7.5	85	86
13DR3_95.FIN2				19.6464	4.12574	0.162	6.17284	0.02316	5.18135	0.34581		147.6	7.8	152.2	9	217	86
13DR3_96.FIN2				8.80669	3.61074	4.89	5.93047	0.3148	5.40025	0.49186		1764.7	82	1799.8	51	1856	64
13DR3_97.FIN2				21.322	4.69083	0.1035	6.66667	0.01607	5.35159	0.039919		102.8	5.5	99.8	6.3	68	91
13DR3_98.FIN2				21.5983	4.75162	0.1077	6.68524	0.01708	5.32787	0.021662		109.2	5.8	103.9	6.6	37	90
13DR3_99.FIN2				19.5695	5.28376	0.1334	6.97151	0.01916	5.21921	-0.037862		122.4	6.5	126.6	8.3	191	97
13DR3_100.FIN2				20.3252	4.06504	0.1268	6.38801	0.01898	5.2687	0.10654		121.18	6.4	121.1	7.3	153	85
* Radiogenic
§ Decay constants used in age calculations: λ238U = 1.55125 x 10-10 λ235U= 9.8485x10-10 (Jaffey et al., 1971); 238U/235U = 137.88 (Chen and Wasserberg, 1981). Uncertainties are given as ± 2σ in last three figures.
Common Pb correction from measured 206Pb/204Pb, with initial Pb composition from Stacey and Kramers (1975).
† Analyses in which epoxy was overlapped and those with greater than 10% uncertainty, 30% discordance, and/or 5% reverse discordance are excluded. Accepted ages calculated using 206Pb/238U ages for grains younger than 800 Ma and 207Pb/206Pb ages for grains older than 800 Ma.

## Sheet: SD3
Table SD3. Visually estimated modal proportions of the minerals present in the rocks studied here. Reproducible mineral assemblages were determined through detailed petrographic studies by Ernst et al. (1993).
Sample no.	12SL1	11SL1	11SL2	10NB2	10NB1	SLO-401	SLO-402	SLO-387	SLO-382	13NB1	11MB6	11MB4A	11MB3	SLO-107	11SM1	13SR2	LP19	10NB6	11MB5	15NB1*	13DR1	13DR3
UTM zone	10S	10S	10S	10S	10S	10S	10S	10S	10S	10S	10S	10S	10S	10S	10S	10S	11S	10S	10S	10S	10S	10S
UTM Easting	612487	629784	635943	642864	644021	664410	666010	663266	665484	654613	665317	685368	693282	715176	756869	770185	264023	606296	671162	703902	727405	709609
UTM Northing	4008060	3987317	3983176	3969434	3967956	3959034	3957662	3957080	3953005	3.95124e+06	3945492	3925367	3920170	3909554	3882266	3.8485e+06	3818596	4011121	3937841	3893095	3.99072e+06	4.02098e+06
lithic fragments
shale chips	6	5	4	4	5	1	1	1	1		3	3			2	2	2	1	2		1
chert	9	2	6	7	8	8	15	12	12	4	7	15	10	9	5	6	20	2	1		13	9
volcanic frags	19	3				5	10	25	9		6	16		9	2	2	6		2		19	13
siltstone		4	3	3	6	2	5	3	3		7	6	7	4	6	10	2	5	4		8	15
Total	34	14	13	14	19	16	31	41	25	4	23	40	17	22	15	20	30	8	9	9	41	37
v+c	28
detrital minerals
quartz	28	40	26	33	31	28	20	11	21	30	30	20	30	30	30	29	29	32	34	39	20	12
plagioclase	21	25	40	29	26	36	32	26	31	36	32	29	28	32	32	27	26	38	40		17	32
K-spar					tr													3	1
Total Feldspar	21	25	40	29	26	36	32	26	31	36	32	29	28	32	32	27	26	41	41	52
Total Detrital	49	65	66	62	57	64	52	37	52	66	62	49	58	62	62	56	55
metamorphic (?) minerals
white mica	4	5	7	10	5	8	4	tr	2	11	3	1	2	4	7	7	4	5	4		4	12
biotite ± stilp.	4	tr	4	4	6	1	1		2	4	3	3	7	1	tr	10	1	8	6		8
chlorite	2	1	4	2	7	5	6	5	7	6	2	3	5	2	5	3	2	3	3		4	2
Total mica	10	6	15	16	18	14	11	5	11	21	8	7	14	7	12	20	7	16	13	8	16	14
opaques*	3	3	2	5	4	tr	1	1	2	3	2	1	1	1	1	2	1	1	2		2	tr
epidote ± cpx		tr	tr			tr		5	2		2	2	2	tr	tr	1	1				tr
carbonate	2	3		3	1	3	1	1		5	2			4			5	tr			2
titanite	1	2	2			1	1	tr	1	tr	tr	tr	tr	1	tr	tr	1	1			1
carb. matter	1	2	2		1	1	tr	1	1	1	1	1	1	tr	1	1	tr	1	1		1	tr
zeolites?				tr?				tr
pumpellyite		5						9	6					1	9							5
prehnite														2
lawsonite						1	3								tr
Na-cpx						tr
Total metamorphic	0	5	0	0	0	1	3	9	6	0	0	0	0	3	9	0	0
*Analysis from Lee-Wong and Howell (1977)
